# Supplementary material
Source: Research Square preprint supplement (doi:10.21203/rs.3.rs-9644263/v1)
Supplement: Supplementary file 1 [file 4a1976bd6b8dfd488943db56.xlsx]

## Sheet: Sheet1
Realm	Order	Scenario	Biomass_Mtons	Biomass_lw95	Biomass_up95	Cells
Pantropical	Rodentia	COMB	18.048	0.373704	51.2165	12492
Pantropical	Chiroptera	COMB	0.296325	0	0.744705	12492
Pantropical	Carnivora	COMB	2.31945	0.0758944	6.45063	12492
Pantropical	Cetartiodactyla	COMB	13.3865	1.53266	27.342	12492
Pantropical	Diprotodontia	COMB	0.200733	0.00719293	0.442907	12492
Pantropical	Primates	COMB	15.3115	0.178486	38.9925	12492
Pantropical	Afrosoricida	COMB	0.0450978	0.00123692	0.14301	12492
Pantropical	Scandentia	COMB	0.0567867	0.000573169	0.114729	12492
Pantropical	Eulipotyphla	COMB	0.248741	0.000749521	0.715721	12492
Pantropical	Pilosa	COMB	1.24802	0.00287231	3.34583	12492
Pantropical	Cingulata	COMB	1.01734	0.00825834	2.49552	12492
Pantropical	Paucituberculata	COMB	0.000805247	4.29362e-05	0.00156756	12492
Pantropical	Didelphimorphia	COMB	0.701725	0.0164861	1.90003	12492
Pantropical	Lagomorpha	COMB	0.898256	8.85563e-05	2.68928	12492
Pantropical	Perissodactyla	COMB	2.34952	0.135438	5.21082	12492
Pantropical	Dermoptera	COMB	0.0774629	0.000110474	0.27609	12492
Pantropical	Dasyuromorphia	COMB	0.0127644	9.39517e-05	0.0275345	12492
Pantropical	Hyracoidea	COMB	1.85714	0.0083516	5.39164	12492
Pantropical	Peramelemorphia	COMB	0.0279868	0.00110263	0.0550352	12492
Pantropical	Macroscelidea	COMB	0.026413	0.000607431	0.0627186	12492
Pantropical	Proboscidea	COMB	4.51678	1.07072	8.27483	12492
Pantropical	Pholidota	COMB	0.114982	0.00144664	0.323915	12492
Pantropical	Tubulidentata	COMB	0.0650212	0.000872225	0.133419	12492
Pantropical	Monotremata	COMB	0.00320472	0	0.00660748	12492
Neotropical	Rodentia	COMB	10.7666	0.208554	30.2979	5897
Neotropical	Chiroptera	COMB	0.15588	0	0.364647	5897
Neotropical	Carnivora	COMB	1.34539	0.0474864	3.80493	5897
Neotropical	Cetartiodactyla	COMB	3.40553	0.440952	6.68995	5897
Neotropical	Diprotodontia	COMB	0	0	0	5897
Neotropical	Primates	COMB	5.95587	0.146598	15.3415	5897
Neotropical	Afrosoricida	COMB	0	0	0	5897
Neotropical	Scandentia	COMB	0	0	0	5897
Neotropical	Eulipotyphla	COMB	0.00317395	3.14397e-06	0.00800023	5897
Neotropical	Pilosa	COMB	1.24802	0.00287231	3.34583	5897
Neotropical	Cingulata	COMB	1.01734	0.00825834	2.49552	5897
Neotropical	Paucituberculata	COMB	0.000805247	4.29362e-05	0.00156756	5897
Neotropical	Didelphimorphia	COMB	0.701725	0.0164861	1.90003	5897
Neotropical	Lagomorpha	COMB	0.415559	0	1.55165	5897
Neotropical	Perissodactyla	COMB	1.20139	0.135438	2.34701	5897
Neotropical	Dermoptera	COMB	0	0	0	5897
Neotropical	Dasyuromorphia	COMB	0	0	0	5897
Neotropical	Hyracoidea	COMB	0	0	0	5897
Neotropical	Peramelemorphia	COMB	0	0	0	5897
Neotropical	Macroscelidea	COMB	0	0	0	5897
Neotropical	Proboscidea	COMB	0	0	0	5897
Neotropical	Pholidota	COMB	0	0	0	5897
Neotropical	Tubulidentata	COMB	0	0	0	5897
Neotropical	Monotremata	COMB	0	0	0	5897
Afrotropical	Rodentia	COMB	3.86795	0.115986	10.7327	3647
Afrotropical	Chiroptera	COMB	0.0603206	0	0.146398	3647
Afrotropical	Carnivora	COMB	0.542667	0.0221232	1.46815	3647
Afrotropical	Cetartiodactyla	COMB	5.63844	0.71289	11.7059	3647
Afrotropical	Diprotodontia	COMB	0	0	0	3647
Afrotropical	Primates	COMB	7.20851	0.030792	17.6279	3647
Afrotropical	Afrosoricida	COMB	0.0450978	0.00123692	0.14301	3647
Afrotropical	Scandentia	COMB	0	0	0	3647
Afrotropical	Eulipotyphla	COMB	0.0845434	0.000432171	0.189673	3647
Afrotropical	Pilosa	COMB	0	0	0	3647
Afrotropical	Cingulata	COMB	0	0	0	3647
Afrotropical	Paucituberculata	COMB	0	0	0	3647
Afrotropical	Didelphimorphia	COMB	0	0	0	3647
Afrotropical	Lagomorpha	COMB	0.291721	8.53827e-05	0.696839	3647
Afrotropical	Perissodactyla	COMB	0.924274	0	2.38084	3647
Afrotropical	Dermoptera	COMB	0	0	0	3647
Afrotropical	Dasyuromorphia	COMB	0	0	0	3647
Afrotropical	Hyracoidea	COMB	1.85714	0.0083516	5.39164	3647
Afrotropical	Peramelemorphia	COMB	0	0	0	3647
Afrotropical	Macroscelidea	COMB	0.026413	0.000607431	0.0627186	3647
Afrotropical	Proboscidea	COMB	3.21008	1.07072	5.37131	3647
Afrotropical	Pholidota	COMB	0.0963749	0.00144664	0.284578	3647
Afrotropical	Tubulidentata	COMB	0.0650212	0.000872225	0.133419	3647
Afrotropical	Monotremata	COMB	0	0	0	3647
Indomalayan	Rodentia	COMB	3.41351	0.0491632	10.1859	2948
Indomalayan	Chiroptera	COMB	0.0801246	0	0.233659	2948
Indomalayan	Carnivora	COMB	0.431397	0.00628484	1.17755	2948
Indomalayan	Cetartiodactyla	COMB	4.34258	0.378813	8.9462	2948
Indomalayan	Diprotodontia	COMB	0.200733	0.00719293	0.442907	2948
Indomalayan	Primates	COMB	2.14712	0.00109597	6.02308	2948
Indomalayan	Afrosoricida	COMB	0	0	0	2948
Indomalayan	Scandentia	COMB	0.0567867	0.000573169	0.114729	2948
Indomalayan	Eulipotyphla	COMB	0.161023	0.000314206	0.518047	2948
Indomalayan	Pilosa	COMB	0	0	0	2948
Indomalayan	Cingulata	COMB	0	0	0	2948
Indomalayan	Paucituberculata	COMB	0	0	0	2948
Indomalayan	Didelphimorphia	COMB	0	0	0	2948
Indomalayan	Lagomorpha	COMB	0.190976	3.17367e-06	0.440794	2948
Indomalayan	Perissodactyla	COMB	0.223854	0	0.482969	2948
Indomalayan	Dermoptera	COMB	0.0774629	0.000110474	0.27609	2948
Indomalayan	Dasyuromorphia	COMB	0.0127644	9.39517e-05	0.0275345	2948
Indomalayan	Hyracoidea	COMB	0	0	0	2948
Indomalayan	Peramelemorphia	COMB	0.0279868	0.00110263	0.0550352	2948
Indomalayan	Macroscelidea	COMB	0	0	0	2948
Indomalayan	Proboscidea	COMB	1.30671	0	2.90353	2948
Indomalayan	Pholidota	COMB	0.0186068	0	0.0393371	2948
Indomalayan	Tubulidentata	COMB	0	0	0	2948
Indomalayan	Monotremata	COMB	0.00320472	0	0.00660748	2948
Pantropical	Rodentia	Hloss	13.7915	1.22012	37.3489	12492
Pantropical	Chiroptera	Hloss	0.176966	0	0.412938	12492
Pantropical	Carnivora	Hloss	2.34953	0.24923	6.12999	12492
Pantropical	Cetartiodactyla	Hloss	20.822	5.24181	38.3366	12492
Pantropical	Diprotodontia	Hloss	0.160845	0.0347198	0.311136	12492
Pantropical	Primates	Hloss	18.1588	0.609946	44.4402	12492
Pantropical	Afrosoricida	Hloss	0.0301507	0.00426595	0.0855858	12492
Pantropical	Scandentia	Hloss	0.0403409	0.0115623	0.0700013	12492
Pantropical	Eulipotyphla	Hloss	0.154101	0.0115191	0.421713	12492
Pantropical	Pilosa	Hloss	1.06139	0.0138179	2.72799	12492
Pantropical	Cingulata	Hloss	0.887182	0.0296024	2.11602	12492
Pantropical	Paucituberculata	Hloss	0.000562035	0.000182081	0.000941989	12492
Pantropical	Didelphimorphia	Hloss	0.489302	0.0513555	1.27692	12492
Pantropical	Lagomorpha	Hloss	0.848453	0.00221866	2.44935	12492
Pantropical	Perissodactyla	Hloss	4.26468	0.400442	9.36989	12492
Pantropical	Dermoptera	Hloss	0.0711448	0.000982718	0.245424	12492
Pantropical	Dasyuromorphia	Hloss	0.00919234	0.00170384	0.0174749	12492
Pantropical	Hyracoidea	Hloss	1.76301	0.0243759	4.90622	12492
Pantropical	Peramelemorphia	Hloss	0.0216817	0.00707343	0.036386	12492
Pantropical	Macroscelidea	Hloss	0.0185189	0.00357262	0.0390172	12492
Pantropical	Proboscidea	Hloss	7.66248	2.45516	12.8698	12492
Pantropical	Pholidota	Hloss	0.122861	0.0133362	0.311645	12492
Pantropical	Tubulidentata	Hloss	0.0883387	0.016813	0.159864	12492
Pantropical	Monotremata	Hloss	0.00288112	0.000531024	0.00523122	12492
Neotropical	Rodentia	Hloss	8.36853	0.482925	22.2917	5897
Neotropical	Chiroptera	Hloss	0.0914051	0	0.19708	5897
Neotropical	Carnivora	Hloss	1.19634	0.0926468	3.22944	5897
Neotropical	Cetartiodactyla	Hloss	4.66389	0.752127	8.80202	5897
Neotropical	Diprotodontia	Hloss	0	0	0	5897
Neotropical	Primates	Hloss	6.92992	0.309107	17.2985	5897
Neotropical	Afrosoricida	Hloss	0	0	0	5897
Neotropical	Scandentia	Hloss	0	0	0	5897
Neotropical	Eulipotyphla	Hloss	0.00167328	6.92522e-05	0.00383711	5897
Neotropical	Pilosa	Hloss	1.06139	0.0138179	2.72799	5897
Neotropical	Cingulata	Hloss	0.887182	0.0296024	2.11602	5897
Neotropical	Paucituberculata	Hloss	0.000562035	0.000182081	0.000941989	5897
Neotropical	Didelphimorphia	Hloss	0.489302	0.0513555	1.27692	5897
Neotropical	Lagomorpha	Hloss	0.410685	0	1.49796	5897
Neotropical	Perissodactyla	Hloss	1.73517	0.274882	3.31215	5897
Neotropical	Dermoptera	Hloss	0	0	0	5897
Neotropical	Dasyuromorphia	Hloss	0	0	0	5897
Neotropical	Hyracoidea	Hloss	0	0	0	5897
Neotropical	Peramelemorphia	Hloss	0	0	0	5897
Neotropical	Macroscelidea	Hloss	0	0	0	5897
Neotropical	Proboscidea	Hloss	0	0	0	5897
Neotropical	Pholidota	Hloss	0	0	0	5897
Neotropical	Tubulidentata	Hloss	0	0	0	5897
Neotropical	Monotremata	Hloss	0	0	0	5897
Afrotropical	Rodentia	Hloss	2.57046	0.369597	6.68166	3647
Afrotropical	Chiroptera	Hloss	0.037079	0	0.0836148	3647
Afrotropical	Carnivora	Hloss	0.531772	0.0696646	1.36062	3647
Afrotropical	Cetartiodactyla	Hloss	8.14897	2.11793	15.0827	3647
Afrotropical	Diprotodontia	Hloss	0	0	0	3647
Afrotropical	Primates	Hloss	8.18305	0.198972	19.1367	3647
Afrotropical	Afrosoricida	Hloss	0.0301507	0.00426595	0.0855858	3647
Afrotropical	Scandentia	Hloss	0	0	0	3647
Afrotropical	Eulipotyphla	Hloss	0.0468382	0.0042976	0.0930246	3647
Afrotropical	Pilosa	Hloss	0	0	0	3647
Afrotropical	Cingulata	Hloss	0	0	0	3647
Afrotropical	Paucituberculata	Hloss	0	0	0	3647
Afrotropical	Didelphimorphia	Hloss	0	0	0	3647
Afrotropical	Lagomorpha	Hloss	0.248232	0.000481884	0.553449	3647
Afrotropical	Perissodactyla	Hloss	2.07769	0.0410276	5.18387	3647
Afrotropical	Dermoptera	Hloss	0	0	0	3647
Afrotropical	Dasyuromorphia	Hloss	0	0	0	3647
Afrotropical	Hyracoidea	Hloss	1.76301	0.0243759	4.90622	3647
Afrotropical	Peramelemorphia	Hloss	0	0	0	3647
Afrotropical	Macroscelidea	Hloss	0.0185189	0.00357262	0.0390172	3647
Afrotropical	Proboscidea	Hloss	4.6055	2.12776	7.08325	3647
Afrotropical	Pholidota	Hloss	0.100144	0.00990019	0.269648	3647
Afrotropical	Tubulidentata	Hloss	0.0883387	0.016813	0.159864	3647
Afrotropical	Monotremata	Hloss	0	0	0	3647
Indomalayan	Rodentia	Hloss	2.85254	0.367599	8.37554	2948
Indomalayan	Chiroptera	Hloss	0.0484824	0	0.132243	2948
Indomalayan	Carnivora	Hloss	0.621416	0.0869188	1.53993	2948
Indomalayan	Cetartiodactyla	Hloss	8.00912	2.37175	14.4519	2948
Indomalayan	Diprotodontia	Hloss	0.160845	0.0347198	0.311136	2948
Indomalayan	Primates	Hloss	3.04579	0.101866	8.00495	2948
Indomalayan	Afrosoricida	Hloss	0	0	0	2948
Indomalayan	Scandentia	Hloss	0.0403409	0.0115623	0.0700013	2948
Indomalayan	Eulipotyphla	Hloss	0.10559	0.00715225	0.324851	2948
Indomalayan	Pilosa	Hloss	0	0	0	2948
Indomalayan	Cingulata	Hloss	0	0	0	2948
Indomalayan	Paucituberculata	Hloss	0	0	0	2948
Indomalayan	Didelphimorphia	Hloss	0	0	0	2948
Indomalayan	Lagomorpha	Hloss	0.189536	0.00173678	0.397939	2948
Indomalayan	Perissodactyla	Hloss	0.451822	0.0845327	0.873868	2948
Indomalayan	Dermoptera	Hloss	0.0711448	0.000982718	0.245424	2948
Indomalayan	Dasyuromorphia	Hloss	0.00919234	0.00170384	0.0174749	2948
Indomalayan	Hyracoidea	Hloss	0	0	0	2948
Indomalayan	Peramelemorphia	Hloss	0.0216817	0.00707343	0.036386	2948
Indomalayan	Macroscelidea	Hloss	0	0	0	2948
Indomalayan	Proboscidea	Hloss	3.05698	0.327409	5.78655	2948
Indomalayan	Pholidota	Hloss	0.0227168	0.00343598	0.0419976	2948
Indomalayan	Tubulidentata	Hloss	0	0	0	2948
Indomalayan	Monotremata	Hloss	0.00288112	0.000531024	0.00523122	2948
Pantropical	Rodentia	Hunting	35.6076	0.585045	105.296	12492
Pantropical	Chiroptera	Hunting	0.477338	0	1.18562	12492
Pantropical	Carnivora	Hunting	3.48654	0.116479	9.78677	12492
Pantropical	Cetartiodactyla	Hunting	17.1656	1.75728	36.0199	12492
Pantropical	Diprotodontia	Hunting	0.290424	0.0107606	0.632054	12492
Pantropical	Primates	Hunting	22.0663	0.208269	56.2812	12492
Pantropical	Afrosoricida	Hunting	0.0740108	0.00180925	0.231678	12492
Pantropical	Scandentia	Hunting	0.0818281	0.000744836	0.166344	12492
Pantropical	Eulipotyphla	Hunting	0.63151	0.00124568	2.00231	12492
Pantropical	Pilosa	Hunting	1.70749	0.00370542	4.53476	12492
Pantropical	Cingulata	Hunting	1.18178	0.0101982	2.89684	12492
Pantropical	Paucituberculata	Hunting	0.00317629	0.000142945	0.00621019	12492
Pantropical	Didelphimorphia	Hunting	1.11092	0.0259467	2.97334	12492
Pantropical	Lagomorpha	Hunting	1.80443	0.00195644	5.13601	12492
Pantropical	Perissodactyla	Hunting	3.56649	0.143688	8.65508	12492
Pantropical	Dermoptera	Hunting	0.0931426	0.000134221	0.331926	12492
Pantropical	Dasyuromorphia	Hunting	0.0207795	0.000118515	0.0444331	12492
Pantropical	Hyracoidea	Hunting	2.73202	0.00972028	7.92742	12492
Pantropical	Peramelemorphia	Hunting	0.0341	0.00132166	0.0671666	12492
Pantropical	Macroscelidea	Hunting	0.0425767	0.000695208	0.107594	12492
Pantropical	Proboscidea	Hunting	4.98874	1.09596	9.30942	12492
Pantropical	Pholidota	Hunting	0.132037	0.00156749	0.364879	12492
Pantropical	Tubulidentata	Hunting	0.0696258	0.000893223	0.143587	12492
Pantropical	Monotremata	Hunting	0.00341892	0	0.0070492	12492
Neotropical	Rodentia	Hunting	21.5825	0.327627	64.0347	5897
Neotropical	Chiroptera	Hunting	0.265885	0	0.621527	5897
Neotropical	Carnivora	Hunting	2.12137	0.0742795	6.08794	5897
Neotropical	Cetartiodactyla	Hunting	4.40635	0.516672	8.92759	5897
Neotropical	Diprotodontia	Hunting	0	0	0	5897
Neotropical	Primates	Hunting	8.07438	0.167632	20.7932	5897
Neotropical	Afrosoricida	Hunting	0	0	0	5897
Neotropical	Scandentia	Hunting	0	0	0	5897
Neotropical	Eulipotyphla	Hunting	0.00833553	7.88696e-06	0.0202635	5897
Neotropical	Pilosa	Hunting	1.70749	0.00370542	4.53476	5897
Neotropical	Cingulata	Hunting	1.18178	0.0101982	2.89684	5897
Neotropical	Paucituberculata	Hunting	0.00317629	0.000142945	0.00621019	5897
Neotropical	Didelphimorphia	Hunting	1.11092	0.0259467	2.97334	5897
Neotropical	Lagomorpha	Hunting	0.630852	0	2.33797	5897
Neotropical	Perissodactyla	Hunting	1.32667	0.143688	2.62182	5897
Neotropical	Dermoptera	Hunting	0	0	0	5897
Neotropical	Dasyuromorphia	Hunting	0	0	0	5897
Neotropical	Hyracoidea	Hunting	0	0	0	5897
Neotropical	Peramelemorphia	Hunting	0	0	0	5897
Neotropical	Macroscelidea	Hunting	0	0	0	5897
Neotropical	Proboscidea	Hunting	0	0	0	5897
Neotropical	Pholidota	Hunting	0	0	0	5897
Neotropical	Tubulidentata	Hunting	0	0	0	5897
Neotropical	Monotremata	Hunting	0	0	0	5897
Afrotropical	Rodentia	Hunting	6.76856	0.173334	19.2279	3647
Afrotropical	Chiroptera	Hunting	0.0901859	0	0.219507	3647
Afrotropical	Carnivora	Hunting	0.774363	0.0320703	2.10543	3647
Afrotropical	Cetartiodactyla	Hunting	7.1373	0.774887	15.3268	3647
Afrotropical	Diprotodontia	Hunting	0	0	0	3647
Afrotropical	Primates	Hunting	10.3058	0.0388982	25.2447	3647
Afrotropical	Afrosoricida	Hunting	0.0740108	0.00180925	0.231678	3647
Afrotropical	Scandentia	Hunting	0	0	0	3647
Afrotropical	Eulipotyphla	Hunting	0.156013	0.000821789	0.350584	3647
Afrotropical	Pilosa	Hunting	0	0	0	3647
Afrotropical	Cingulata	Hunting	0	0	0	3647
Afrotropical	Paucituberculata	Hunting	0	0	0	3647
Afrotropical	Didelphimorphia	Hunting	0	0	0	3647
Afrotropical	Lagomorpha	Hunting	0.593674	0.0016871	1.45657	3647
Afrotropical	Perissodactyla	Hunting	1.63319	0	4.21342	3647
Afrotropical	Dermoptera	Hunting	0	0	0	3647
Afrotropical	Dasyuromorphia	Hunting	0	0	0	3647
Afrotropical	Hyracoidea	Hunting	2.73202	0.00972028	7.92742	3647
Afrotropical	Peramelemorphia	Hunting	0	0	0	3647
Afrotropical	Macroscelidea	Hunting	0.0425767	0.000695208	0.107594	3647
Afrotropical	Proboscidea	Hunting	3.3321	1.09596	5.59712	3647
Afrotropical	Pholidota	Hunting	0.105517	0.00156749	0.308625	3647
Afrotropical	Tubulidentata	Hunting	0.0696258	0.000893223	0.143587	3647
Afrotropical	Monotremata	Hunting	0	0	0	3647
Indomalayan	Rodentia	Hunting	7.25652	0.0840837	22.0336	2948
Indomalayan	Chiroptera	Hunting	0.121267	0	0.344585	2948
Indomalayan	Carnivora	Hunting	0.5908	0.010129	1.59341	2948
Indomalayan	Cetartiodactyla	Hunting	5.62198	0.465725	11.7656	2948
Indomalayan	Diprotodontia	Hunting	0.290424	0.0107606	0.632054	2948
Indomalayan	Primates	Hunting	3.68618	0.0017388	10.2432	2948
Indomalayan	Afrosoricida	Hunting	0	0	0	2948
Indomalayan	Scandentia	Hunting	0.0818281	0.000744836	0.166344	2948
Indomalayan	Eulipotyphla	Hunting	0.467162	0.000416003	1.63146	2948
Indomalayan	Pilosa	Hunting	0	0	0	2948
Indomalayan	Cingulata	Hunting	0	0	0	2948
Indomalayan	Paucituberculata	Hunting	0	0	0	2948
Indomalayan	Didelphimorphia	Hunting	0	0	0	2948
Indomalayan	Lagomorpha	Hunting	0.579907	0.000269343	1.34147	2948
Indomalayan	Perissodactyla	Hunting	0.606628	0	1.81984	2948
Indomalayan	Dermoptera	Hunting	0.0931426	0.000134221	0.331926	2948
Indomalayan	Dasyuromorphia	Hunting	0.0207795	0.000118515	0.0444331	2948
Indomalayan	Hyracoidea	Hunting	0	0	0	2948
Indomalayan	Peramelemorphia	Hunting	0.0341	0.00132166	0.0671666	2948
Indomalayan	Macroscelidea	Hunting	0	0	0	2948
Indomalayan	Proboscidea	Hunting	1.65664	0	3.7123	2948
Indomalayan	Pholidota	Hunting	0.0265199	0	0.0562541	2948
Indomalayan	Tubulidentata	Hunting	0	0	0	2948
Indomalayan	Monotremata	Hunting	0.00341892	0	0.0070492	2948
Pantropical	Rodentia	IUCN_Historical	15.7327	1.39517	42.4152	12492
Pantropical	Chiroptera	IUCN_Historical	0.214353	0	0.496975	12492
Pantropical	Carnivora	IUCN_Historical	2.93263	0.308797	7.74714	12492
Pantropical	Cetartiodactyla	IUCN_Historical	23.1599	5.82014	42.9874	12492
Pantropical	Diprotodontia	IUCN_Historical	0.17678	0.038035	0.341863	12492
Pantropical	Primates	IUCN_Historical	23.1768	0.738168	56.821	12492
Pantropical	Afrosoricida	IUCN_Historical	0.0341938	0.00584127	0.0904447	12492
Pantropical	Scandentia	IUCN_Historical	0.0527646	0.0147927	0.0925765	12492
Pantropical	Eulipotyphla	IUCN_Historical	0.21603	0.0134644	0.622733	12492
Pantropical	Pilosa	IUCN_Historical	1.18851	0.0185607	3.05331	12492
Pantropical	Cingulata	IUCN_Historical	0.929078	0.0314576	2.21537	12492
Pantropical	Paucituberculata	IUCN_Historical	0.000837595	0.000271914	0.00140328	12492
Pantropical	Didelphimorphia	IUCN_Historical	0.629207	0.069547	1.63256	12492
Pantropical	Lagomorpha	IUCN_Historical	0.792165	0.00264526	2.45145	12492
Pantropical	Perissodactyla	IUCN_Historical	4.72262	0.494702	10.2635	12492
Pantropical	Dermoptera	IUCN_Historical	0.0723414	0.000934559	0.249856	12492
Pantropical	Dasyuromorphia	IUCN_Historical	0.00920422	0.00175359	0.0174108	12492
Pantropical	Hyracoidea	IUCN_Historical	1.81398	0.0282328	5.05438	12492
Pantropical	Peramelemorphia	IUCN_Historical	0.0214384	0.00698729	0.0359928	12492
Pantropical	Macroscelidea	IUCN_Historical	0.018628	0.00425067	0.035132	12492
Pantropical	Proboscidea	IUCN_Historical	11.1517	3.73877	18.5646	12492
Pantropical	Pholidota	IUCN_Historical	0.138743	0.0157377	0.343838	12492
Pantropical	Tubulidentata	IUCN_Historical	0.0966591	0.0184137	0.174905	12492
Pantropical	Monotremata	IUCN_Historical	0.00307194	0.000566683	0.0055772	12492
Neotropical	Rodentia	IUCN_Historical	9.79256	0.589378	25.7448	5897
Neotropical	Chiroptera	IUCN_Historical	0.115179	0	0.248183	5897
Neotropical	Carnivora	IUCN_Historical	1.5314	0.110695	4.18862	5897
Neotropical	Cetartiodactyla	IUCN_Historical	5.43457	0.944567	10.1473	5897
Neotropical	Diprotodontia	IUCN_Historical	0	0	0	5897
Neotropical	Primates	IUCN_Historical	8.84396	0.350704	22.0087	5897
Neotropical	Afrosoricida	IUCN_Historical	0	0	0	5897
Neotropical	Scandentia	IUCN_Historical	0	0	0	5897
Neotropical	Eulipotyphla	IUCN_Historical	0.00184008	0.000118299	0.00411664	5897
Neotropical	Pilosa	IUCN_Historical	1.18851	0.0185607	3.05331	5897
Neotropical	Cingulata	IUCN_Historical	0.929078	0.0314576	2.21537	5897
Neotropical	Paucituberculata	IUCN_Historical	0.000837595	0.000271914	0.00140328	5897
Neotropical	Didelphimorphia	IUCN_Historical	0.629207	0.069547	1.63256	5897
Neotropical	Lagomorpha	IUCN_Historical	0.493778	0	1.81428	5897
Neotropical	Perissodactyla	IUCN_Historical	2.18608	0.337439	4.21687	5897
Neotropical	Dermoptera	IUCN_Historical	0	0	0	5897
Neotropical	Dasyuromorphia	IUCN_Historical	0	0	0	5897
Neotropical	Hyracoidea	IUCN_Historical	0	0	0	5897
Neotropical	Peramelemorphia	IUCN_Historical	0	0	0	5897
Neotropical	Macroscelidea	IUCN_Historical	0	0	0	5897
Neotropical	Proboscidea	IUCN_Historical	0	0	0	5897
Neotropical	Pholidota	IUCN_Historical	0	0	0	5897
Neotropical	Tubulidentata	IUCN_Historical	0	0	0	5897
Neotropical	Monotremata	IUCN_Historical	0	0	0	5897
Afrotropical	Rodentia	IUCN_Historical	2.12575	0.339262	5.38321	3647
Afrotropical	Chiroptera	IUCN_Historical	0.0407418	0	0.0926294	3647
Afrotropical	Carnivora	IUCN_Historical	0.616406	0.0821866	1.62317	3647
Afrotropical	Cetartiodactyla	IUCN_Historical	8.91335	2.29871	16.7017	3647
Afrotropical	Diprotodontia	IUCN_Historical	0	0	0	3647
Afrotropical	Primates	IUCN_Historical	10.04	0.212651	23.5738	3647
Afrotropical	Afrosoricida	IUCN_Historical	0.0341938	0.00584127	0.0904447	3647
Afrotropical	Scandentia	IUCN_Historical	0	0	0	3647
Afrotropical	Eulipotyphla	IUCN_Historical	0.0499453	0.00419212	0.0985883	3647
Afrotropical	Pilosa	IUCN_Historical	0	0	0	3647
Afrotropical	Cingulata	IUCN_Historical	0	0	0	3647
Afrotropical	Paucituberculata	IUCN_Historical	0	0	0	3647
Afrotropical	Didelphimorphia	IUCN_Historical	0	0	0	3647
Afrotropical	Lagomorpha	IUCN_Historical	0.146148	0.000551356	0.319059	3647
Afrotropical	Perissodactyla	IUCN_Historical	1.87541	0.0347194	4.76726	3647
Afrotropical	Dermoptera	IUCN_Historical	0	0	0	3647
Afrotropical	Dasyuromorphia	IUCN_Historical	0	0	0	3647
Afrotropical	Hyracoidea	IUCN_Historical	1.81398	0.0282328	5.05438	3647
Afrotropical	Peramelemorphia	IUCN_Historical	0	0	0	3647
Afrotropical	Macroscelidea	IUCN_Historical	0.018628	0.00425067	0.035132	3647
Afrotropical	Proboscidea	IUCN_Historical	7.18002	3.31183	11.0482	3647
Afrotropical	Pholidota	IUCN_Historical	0.107784	0.0110828	0.286575	3647
Afrotropical	Tubulidentata	IUCN_Historical	0.0966591	0.0184137	0.174905	3647
Afrotropical	Monotremata	IUCN_Historical	0	0	0	3647
Indomalayan	Rodentia	IUCN_Historical	3.81442	0.466525	11.2871	2948
Indomalayan	Chiroptera	IUCN_Historical	0.0584316	0	0.156163	2948
Indomalayan	Carnivora	IUCN_Historical	0.784819	0.115916	1.93535	2948
Indomalayan	Cetartiodactyla	IUCN_Historical	8.81196	2.57686	16.1384	2948
Indomalayan	Diprotodontia	IUCN_Historical	0.17678	0.038035	0.341863	2948
Indomalayan	Primates	IUCN_Historical	4.29284	0.174813	11.2385	2948
Indomalayan	Afrosoricida	IUCN_Historical	0	0	0	2948
Indomalayan	Scandentia	IUCN_Historical	0.0527646	0.0147927	0.0925765	2948
Indomalayan	Eulipotyphla	IUCN_Historical	0.164244	0.00915398	0.520028	2948
Indomalayan	Pilosa	IUCN_Historical	0	0	0	2948
Indomalayan	Cingulata	IUCN_Historical	0	0	0	2948
Indomalayan	Paucituberculata	IUCN_Historical	0	0	0	2948
Indomalayan	Didelphimorphia	IUCN_Historical	0	0	0	2948
Indomalayan	Lagomorpha	IUCN_Historical	0.152239	0.0020939	0.318115	2948
Indomalayan	Perissodactyla	IUCN_Historical	0.661125	0.122543	1.27942	2948
Indomalayan	Dermoptera	IUCN_Historical	0.0723414	0.000934559	0.249856	2948
Indomalayan	Dasyuromorphia	IUCN_Historical	0.00920422	0.00175359	0.0174108	2948
Indomalayan	Hyracoidea	IUCN_Historical	0	0	0	2948
Indomalayan	Peramelemorphia	IUCN_Historical	0.0214384	0.00698729	0.0359928	2948
Indomalayan	Macroscelidea	IUCN_Historical	0	0	0	2948
Indomalayan	Proboscidea	IUCN_Historical	3.97167	0.426948	7.51639	2948
Indomalayan	Pholidota	IUCN_Historical	0.030959	0.00465498	0.0572631	2948
Indomalayan	Tubulidentata	IUCN_Historical	0	0	0	2948
Indomalayan	Monotremata	IUCN_Historical	0.00307194	0.000566683	0.0055772	2948
Pantropical	Rodentia	Natural	16.7869	1.55528	45.278	12492
Pantropical	Chiroptera	Natural	0.230763	0	0.533467	12492
Pantropical	Carnivora	Natural	3.18088	0.351507	8.28516	12492
Pantropical	Cetartiodactyla	Natural	33.8701	7.08379	64.0612	12492
Pantropical	Diprotodontia	Natural	0.215233	0.0483801	0.409915	12492
Pantropical	Primates	Natural	27.0238	0.778281	66.605	12492
Pantropical	Afrosoricida	Natural	0.0397352	0.00603088	0.109835	12492
Pantropical	Scandentia	Natural	0.0651195	0.0165471	0.120507	12492
Pantropical	Eulipotyphla	Natural	0.239165	0.0142424	0.696166	12492
Pantropical	Pilosa	Natural	1.24669	0.0217265	3.20489	12492
Pantropical	Cingulata	Natural	0.944488	0.0332817	2.25098	12492
Pantropical	Paucituberculata	Natural	0.0012826	0.000421693	0.0021435	12492
Pantropical	Didelphimorphia	Natural	0.670973	0.0755726	1.73342	12492
Pantropical	Lagomorpha	Natural	1.33729	0.00288872	3.75147	12492
Pantropical	Perissodactyla	Natural	7.82798	1.05492	15.6379	12492
Pantropical	Dermoptera	Natural	0.0770095	0.000963007	0.266164	12492
Pantropical	Dasyuromorphia	Natural	0.0098262	0.00183788	0.0186532	12492
Pantropical	Hyracoidea	Natural	1.96057	0.0292138	5.46797	12492
Pantropical	Peramelemorphia	Natural	0.0221704	0.00720583	0.0372466	12492
Pantropical	Macroscelidea	Natural	0.0221067	0.00509982	0.0414646	12492
Pantropical	Proboscidea	Natural	26.33	7.18143	45.4786	12492
Pantropical	Pholidota	Natural	0.143258	0.0163331	0.352858	12492
Pantropical	Tubulidentata	Natural	0.0973979	0.0185526	0.176243	12492
Pantropical	Monotremata	Natural	0.00536292	0.000986671	0.00973917	12492
Neotropical	Rodentia	Natural	10.2832	0.650649	27.1503	5897
Neotropical	Chiroptera	Natural	0.12473	0	0.268583	5897
Neotropical	Carnivora	Natural	1.59096	0.120759	4.3249	5897
Neotropical	Cetartiodactyla	Natural	5.92461	0.959924	11.4555	5897
Neotropical	Diprotodontia	Natural	0	0	0	5897
Neotropical	Primates	Natural	9.88502	0.30018	25.0483	5897
Neotropical	Afrosoricida	Natural	0	0	0	5897
Neotropical	Scandentia	Natural	0	0	0	5897
Neotropical	Eulipotyphla	Natural	0.00246819	0.000205735	0.00551693	5897
Neotropical	Pilosa	Natural	1.24669	0.0217265	3.20489	5897
Neotropical	Cingulata	Natural	0.944488	0.0332817	2.25098	5897
Neotropical	Paucituberculata	Natural	0.0012826	0.000421693	0.0021435	5897
Neotropical	Didelphimorphia	Natural	0.670973	0.0755726	1.73342	5897
Neotropical	Lagomorpha	Natural	1.00257	0	3.02825	5897
Neotropical	Perissodactyla	Natural	2.2331	0.347077	4.313	5897
Neotropical	Dermoptera	Natural	0	0	0	5897
Neotropical	Dasyuromorphia	Natural	0	0	0	5897
Neotropical	Hyracoidea	Natural	0	0	0	5897
Neotropical	Peramelemorphia	Natural	0	0	0	5897
Neotropical	Macroscelidea	Natural	0	0	0	5897
Neotropical	Proboscidea	Natural	0	0	0	5897
Neotropical	Pholidota	Natural	0	0	0	5897
Neotropical	Tubulidentata	Natural	0	0	0	5897
Neotropical	Monotremata	Natural	0	0	0	5897
Afrotropical	Rodentia	Natural	2.38056	0.388662	5.99404	3647
Afrotropical	Chiroptera	Natural	0.0441041	0	0.0999611	3647
Afrotropical	Carnivora	Natural	0.693484	0.088401	1.79055	3647
Afrotropical	Cetartiodactyla	Natural	17.2514	3.25949	32.6353	3647
Afrotropical	Diprotodontia	Natural	0	0	0	3647
Afrotropical	Primates	Natural	11.4132	0.255973	26.7761	3647
Afrotropical	Afrosoricida	Natural	0.0397352	0.00603088	0.109835	3647
Afrotropical	Scandentia	Natural	0	0	0	3647
Afrotropical	Eulipotyphla	Natural	0.0532803	0.00447126	0.105203	3647
Afrotropical	Pilosa	Natural	0	0	0	3647
Afrotropical	Cingulata	Natural	0	0	0	3647
Afrotropical	Paucituberculata	Natural	0	0	0	3647
Afrotropical	Didelphimorphia	Natural	0	0	0	3647
Afrotropical	Lagomorpha	Natural	0.162174	0.000528774	0.363261	3647
Afrotropical	Perissodactyla	Natural	1.96541	0.0509615	4.51615	3647
Afrotropical	Dermoptera	Natural	0	0	0	3647
Afrotropical	Dasyuromorphia	Natural	0	0	0	3647
Afrotropical	Hyracoidea	Natural	1.96057	0.0292138	5.46797	3647
Afrotropical	Peramelemorphia	Natural	0	0	0	3647
Afrotropical	Macroscelidea	Natural	0.0221067	0.00509982	0.0414646	3647
Afrotropical	Proboscidea	Natural	12.5725	5.80804	19.337	3647
Afrotropical	Pholidota	Natural	0.109575	0.0113661	0.290459	3647
Afrotropical	Tubulidentata	Natural	0.0973979	0.0185526	0.176243	3647
Afrotropical	Monotremata	Natural	0	0	0	3647
Indomalayan	Rodentia	Natural	4.12314	0.515969	12.1337	2948
Indomalayan	Chiroptera	Natural	0.0619285	0	0.164923	2948
Indomalayan	Carnivora	Natural	0.896443	0.142347	2.16971	2948
Indomalayan	Cetartiodactyla	Natural	10.694	2.86438	19.9703	2948
Indomalayan	Diprotodontia	Natural	0.215233	0.0483801	0.409915	2948
Indomalayan	Primates	Natural	5.72556	0.222128	14.7805	2948
Indomalayan	Afrosoricida	Natural	0	0	0	2948
Indomalayan	Scandentia	Natural	0.0651195	0.0165471	0.120507	2948
Indomalayan	Eulipotyphla	Natural	0.183417	0.00956543	0.585447	2948
Indomalayan	Pilosa	Natural	0	0	0	2948
Indomalayan	Cingulata	Natural	0	0	0	2948
Indomalayan	Paucituberculata	Natural	0	0	0	2948
Indomalayan	Didelphimorphia	Natural	0	0	0	2948
Indomalayan	Lagomorpha	Natural	0.17254	0.00235994	0.359958	2948
Indomalayan	Perissodactyla	Natural	3.62947	0.656879	6.80877	2948
Indomalayan	Dermoptera	Natural	0.0770095	0.000963007	0.266164	2948
Indomalayan	Dasyuromorphia	Natural	0.0098262	0.00183788	0.0186532	2948
Indomalayan	Hyracoidea	Natural	0	0	0	2948
Indomalayan	Peramelemorphia	Natural	0.0221704	0.00720583	0.0372466	2948
Indomalayan	Macroscelidea	Natural	0	0	0	2948
Indomalayan	Proboscidea	Natural	13.7575	1.3734	26.1416	2948
Indomalayan	Pholidota	Natural	0.0336829	0.00496696	0.0623988	2948
Indomalayan	Tubulidentata	Natural	0	0	0	2948
Indomalayan	Monotremata	Natural	0.00536292	0.000986671	0.00973917	2948
