# Supplementary material
Source: Research Square preprint supplement (doi:10.21203/rs.3.rs-9644263/v1)
Supplement: Supplementary file 2 [file cc1b4202fe67d9a9af7110e4.docx]

## **Supplementary Tables.**

**Table S1** | Distribution of community weighted means of body mass (CWMbm) across the pantropical forest zone and Neotropical, Afrotropical and Indomalayan realms across scenarios: Baseline using PHYLACINE (BL), Baseline reconstructed using IUCN polygons including extinct polygons (BLIUCN), only habitat loss (HL), only hunting (OH), and the present-day defaunated scenario combining both pressures (COMB). We report distribution statistics of CWMbm: mean, median, standard deviation (SD), first quartile (Q1), third quartile (Q3), and 95th percentile (P95).

| **Realm** | **Scenario** | **Mean** | **Median** | **SD** | **Q1** | **Q3** | **P95** |
| --- | --- | --- | --- | --- | --- | --- | --- |
| Pantropical | BL | 0.9 | 0.59 | 0.86 | 0.3 | 1.28 | 2.49 |
| Pantropical | BLIUCN | 0.71 | 0.46 | 0.66 | 0.28 | 0.92 | 2.04 |
| Pantropical | HL | 0.63 | 0.43 | 0.76 | 0.26 | 0.81 | 1.72 |
| Pantropical | OH | 0.24 | 0.2 | 0.18 | 0.12 | 0.3 | 0.6 |
| Pantropical | COMB | 0.34 | 0.23 | 0.44 | 0.14 | 0.39 | 0.9 |
| Neotropical | BL | 0.4 | 0.32 | 0.39 | 0.24 | 0.43 | 0.82 |
| Neotropical | BLIUCN | 0.39 | 0.32 | 0.38 | 0.24 | 0.44 | 0.82 |
| Neotropical | HL | 0.41 | 0.33 | 0.53 | 0.22 | 0.46 | 0.93 |
| Neotropical | OH | 0.18 | 0.16 | 0.11 | 0.09 | 0.24 | 0.35 |
| Neotropical | COMB | 0.25 | 0.2 | 0.35 | 0.12 | 0.31 | 0.54 |
| Afrotropical | BL | 1.49 | 1.27 | 0.83 | 0.99 | 1.71 | 2.95 |
| Afrotropical | BLIUCN | 1.12 | 0.96 | 0.71 | 0.66 | 1.35 | 2.63 |
| Afrotropical | HL | 0.85 | 0.67 | 0.97 | 0.4 | 1.03 | 2.18 |
| Afrotropical | OH | 0.32 | 0.26 | 0.21 | 0.18 | 0.4 | 0.77 |
| Afrotropical | COMB | 0.46 | 0.31 | 0.55 | 0.17 | 0.56 | 1.38 |
| Indomalayan | BL | 1.19 | 1.11 | 0.97 | 0.47 | 1.64 | 2.7 |
| Indomalayan | BLIUCN | 0.81 | 0.64 | 0.73 | 0.29 | 1.1 | 2 |
| Indomalayan | HL | 0.8 | 0.67 | 0.72 | 0.3 | 1.07 | 1.87 |
| Indomalayan | OH | 0.28 | 0.2 | 0.21 | 0.13 | 0.39 | 0.69 |
| Indomalayan | COMB | 0.35 | 0.26 | 0.41 | 0.15 | 0.43 | 0.83 |

**Table S2 |** Relative change in community-weighted means of body mass (ΔCWMbm) between baseline scenarios and anthropogenic scenarios across tropical realms. Scenarios include: Baseline reconstructed using Phylacine (BL), baseline reconstructed with IUCN range maps including extinct polygons (BLIUCN), only habitat loss (HL), only hunting (OH), and the present-day defaunated scenario combining both pressures (COMB). For pantropical and realm-level analyses (Neotropical, Afrotropical, Indomalayan), we report distribution statistics of percentage CWMbm changes: mean relative change (ΔCWMbm), standard deviation (SD), first quartile (Q1), and third quartile (Q3). Statistical significance of absolute CWM body mass differences between baseline scenarios and anthropogenic scenarios across tropical realms. For each realm and scenario comparison, we report results from Wilcoxon signed-rank tests: test statistic (W) and p-value. Asterisks indicate significance levels: *p < 0.05, **p < 0.01, ***p < 0.001.

| **Realm** | **Comparison** | **Mean** | **SD** | **Q1** | **Q3** | **W** | ***p-value*** | **Sign.** |
| --- | --- | --- | --- | --- | --- | --- | --- | --- |
| Pantropical | BL - HL | -0.12 | 0.84 | -0.47 | 0.03 | 60820538 | 0 | *** |
| Pantropical | BL - OH | -0.61 | 0.25 | -0.8 | -0.44 | 77923273 | 0 | *** |
| Pantropical | BL - COMB | -0.49 | 0.54 | -0.76 | -0.33 | 75547318 | 0 | *** |
| Neotropical | BL - HL | 0.11 | 1.06 | -0.17 | 0.12 | 9346712 | 6.2e-14 | *** |
| Neotropical | BL - OH | -0.49 | 0.25 | -0.66 | -0.35 | 17339119 | 0 | *** |
| Neotropical | BL - COMB | -0.32 | 0.68 | -0.54 | -0.24 | 16009196 | 0 | *** |
| Afrotropical | BL - HL | -0.38 | 0.55 | -0.69 | -0.16 | 6217444 | 0 | *** |
| Afrotropical | BL - OH | -0.76 | 0.14 | -0.86 | -0.69 | 6651681 | 0 | *** |
| Afrotropical | BL - COMB | -0.67 | 0.31 | -0.86 | -0.55 | 6580562 | 0 | *** |
| Indomalayan | BL - HL | -0.24 | 0.38 | -0.49 | -0.05 | 3824310 | 2e-279 | *** |
| Indomalayan | BL - OH | -0.65 | 0.26 | -0.85 | -0.52 | 4341224 | 0 | *** |
| Indomalayan | BL - COMB | -0.61 | 0.29 | -0.81 | -0.48 | 4306079 | 0 | *** |
| Pantropical | BLIUCN - HL | 0 | 0.79 | -0.22 | 0.02 | 52630360 | 2.4e-262 | *** |
| Pantropical | BLIUCN - OH | -0.57 | 0.23 | -0.72 | -0.43 | 77986497 | 0 | *** |
| Pantropical | BLIUCN - COMB | -0.44 | 0.45 | -0.65 | -0.32 | 75540318 | 0 | *** |
| Neotropical | BLIUCN - HL | 0.1 | 1 | -0.09 | 0.03 | 9867566 | 5.3e-22 | *** |
| Neotropical | BLIUCN - OH | -0.5 | 0.26 | -0.65 | -0.35 | 17377001 | 0 | *** |
| Neotropical | BLIUCN - COMB | -0.33 | 0.54 | -0.51 | -0.26 | 16298015 | 0 | *** |
| Afrotropical | BLIUCN - HL | -0.22 | 0.55 | -0.47 | -0.01 | 5880432 | 0 | *** |
| Afrotropical | BLIUCN - OH | -0.68 | 0.13 | -0.78 | -0.61 | 6652110 | 0 | *** |
| Afrotropical | BLIUCN - COMB | -0.59 | 0.32 | -0.77 | -0.48 | 6547584 | 0 | *** |
| Indomalayan | BLIUCN - HL | 0.06 | 0.48 | -0.08 | 0.09 | 2306414 | 0.004 | ** |
| Indomalayan | BLIUCN - OH | -0.56 | 0.23 | -0.72 | -0.46 | 4340195 | 0 | *** |
| Indomalayan | BLIUCN - COMB | -0.49 | 0.35 | -0.67 | -0.36 | 4290126 | 0 | *** |

**Table S3 |** Comparison of community-weighted means (CWMbm) of body mass differences between the hunting (OH) and habitat loss (HL) scenarios across biogeographic realms. The relative change (ΔCWMbm) for each community was calculated as Δ = ((CWMbm OH – CWMbm HL) / CWMbm HL), representing the proportional change when using HL as the reference. Reported statistics include the mean, standard deviation (SD), and interquartile range (Q1, Q3) of ΔCWMbm. For each realm and scenario comparison, we report results from Wilcoxon signed-rank tests for paired differences between OH and HL scenarios: test statistic (W) and p-value. Asterisks indicate significance levels: *p < 0.05, **p < 0.01, ***p < 0.001.

| **Realm** | **Comparison** | | **Mean** | | **SD** | **Q1** | **Q3** | **W** | ***p-value*** | **Sign.** |
| --- | --- | --- | --- | --- | --- | --- | --- | --- | --- | --- |
| Pantropical | OH - HL | -0.5 | | 0.28 | | -0.68 | -0.36 | 77457339 | 0 | *** |
| Neotropical | OH - HL | -0.46 | | 0.29 | | -0.64 | -0.32 | 17281997 | 0 | *** |
| Afrotropical | OH - HL | -0.53 | | 0.26 | | -0.68 | -0.45 | 6603390 | 0 | *** |
| Indomalayan | OH - HL | -0.55 | | 0.27 | | -0.73 | -0.42 | 4324685 | 0 | *** |

**Table S4 |** Distribution of community weighted means of body mass (CWMbm) of each trophic guild (herbivores, omnivores, invertivores, and carnivores) across the pantropical forest zone and Neotropical, Afrotropical, and Indomalayan realms. Values of CWMbm are shown across scenarios: Baseline reconstructed using Phylacine (BL), Baseline using IUCN ranges (BLIUCN), only habitat loss (HL), only hunting (OH), and the present-day defaunated scenario combining both pressures (COMB). We report distribution statistics of CWMbm: mean, median, standard deviation (SD), first quartile (Q1), third quartile (Q3), and 95th percentile.

| **Guild** | **Realm** | **Scenario** | **Mean** | **Median** | | **SD** | **Q1** | **Q3** | **P95** |
| --- | --- | --- | --- | --- | --- | --- | --- | --- | --- |
| Herbivores | Pantropical | BL | 1.36 | 0.67 | 2.57 | | 0.31 | 1.79 | 3.85 |
| Herbivores | Pantropical | BLIUCN | 1.02 | 0.53 | 1.85 | | 0.3 | 1.24 | 3.23 |
| Herbivores | Pantropical | HL | 0.91 | 0.51 | 3.23 | | 0.29 | 1.08 | 2.56 |
| Herbivores | Pantropical | OH | 0.35 | 0.24 | 0.4 | | 0.14 | 0.41 | 1 |
| Herbivores | Pantropical | COMB | 0.51 | 0.28 | 2.19 | | 0.16 | 0.5 | 1.45 |
| Herbivores | Neotropical | BL | 0.51 | 0.34 | 1.27 | | 0.25 | 0.45 | 0.99 |
| Herbivores | Neotropical | BLIUCN | 0.46 | 0.34 | 0.87 | | 0.24 | 0.46 | 0.97 |
| Herbivores | Neotropical | HL | 0.46 | 0.34 | 1.01 | | 0.22 | 0.48 | 1.09 |
| Herbivores | Neotropical | OH | 0.19 | 0.17 | 0.16 | | 0.09 | 0.25 | 0.39 |
| Herbivores | Neotropical | COMB | 0.28 | 0.21 | 0.91 | | 0.12 | 0.32 | 0.62 |
| Herbivores | Afrotropical | BL | 2.67 | 1.97 | 3.99 | | 1.41 | 2.95 | 4.76 |
| Herbivores | Afrotropical | BLIUCN | 1.97 | 1.45 | 2.89 | | 0.99 | 2.31 | 3.99 |
| Herbivores | Afrotropical | HL | 1.63 | 1.09 | 5.71 | | 0.66 | 1.72 | 3.54 |
| Herbivores | Afrotropical | OH | 0.65 | 0.46 | 0.57 | | 0.3 | 0.74 | 1.97 |
| Herbivores | Afrotropical | COMB | 0.96 | 0.53 | 3.82 | | 0.28 | 0.94 | 2.33 |
| Herbivores | Indomalayan | BL | 1.43 | 1.33 | 1.18 | | 0.57 | 1.98 | 3.34 |
| Herbivores | Indomalayan | BLIUCN | 0.96 | 0.76 | 0.92 | | 0.32 | 1.28 | 2.47 |
| Herbivores | Indomalayan | HL | 0.92 | 0.78 | 0.88 | | 0.33 | 1.22 | 2.18 |
| Herbivores | Indomalayan | OH | 0.32 | 0.22 | 0.25 | | 0.14 | 0.46 | 0.78 |
| Herbivores | Indomalayan | COMB | 0.4 | 0.29 | 0.51 | | 0.16 | 0.5 | 0.99 |
| Omnivores | Pantropical | BL | 0.29 | 0.13 | 0.68 | | 0.07 | 0.25 | 0.77 |
| Omnivores | Pantropical | BLIUCN | 0.35 | 0.14 | 0.89 | | 0.08 | 0.26 | 0.82 |
| Omnivores | Pantropical | HL | 0.47 | 0.15 | 1.17 | | 0.08 | 0.37 | 2.08 |
| Omnivores | Pantropical | OH | 0.22 | 0.08 | 0.77 | | 0.05 | 0.13 | 0.42 |
| Omnivores | Pantropical | COMB | 0.35 | 0.11 | 1.04 | | 0.06 | 0.21 | 1.16 |
| Omnivores | Neotropical | BL | 0.24 | 0.13 | 0.42 | | 0.09 | 0.22 | 0.7 |
| Omnivores | Neotropical | BLIUCN | 0.27 | 0.14 | 0.47 | | 0.1 | 0.26 | 0.7 |
| Omnivores | Neotropical | HL | 0.32 | 0.15 | 0.56 | | 0.1 | 0.35 | 0.82 |
| Omnivores | Neotropical | OH | 0.14 | 0.09 | 0.28 | | 0.06 | 0.13 | 0.37 |
| Omnivores | Neotropical | COMB | 0.24 | 0.12 | 0.49 | | 0.07 | 0.24 | 0.54 |
| Omnivores | Afrotropical | BL | 0.11 | 0.06 | 0.13 | | 0.04 | 0.13 | 0.3 |
| Omnivores | Afrotropical | BLIUCN | 0.11 | 0.06 | 0.15 | | 0.04 | 0.14 | 0.35 |
| Omnivores | Afrotropical | HL | 0.16 | 0.07 | 0.63 | | 0.04 | 0.15 | 0.36 |
| Omnivores | Afrotropical | OH | 0.05 | 0.04 | 0.05 | | 0.02 | 0.07 | 0.13 |
| Omnivores | Afrotropical | COMB | 0.12 | 0.05 | 0.62 | | 0.03 | 0.1 | 0.23 |
| Omnivores | Indomalayan | BL | 0.63 | 0.25 | 1.2 | | 0.16 | 0.65 | 3.18 |
| Omnivores | Indomalayan | BLIUCN | 0.81 | 0.25 | 1.61 | | 0.16 | 0.76 | 3.18 |
| Omnivores | Indomalayan | HL | 1.17 | 0.44 | 2.01 | | 0.17 | 0.94 | 4.57 |
| Omnivores | Indomalayan | OH | 0.59 | 0.14 | 1.48 | | 0.08 | 0.29 | 3.18 |
| Omnivores | Indomalayan | COMB | 0.87 | 0.17 | 1.8 | | 0.11 | 0.43 | 4.42 |
| Invertivores | Pantropical | BL | 0.22 | 0.17 | 0.21 | | 0.09 | 0.3 | 0.51 |
| Invertivores | Pantropical | BLIUCN | 0.23 | 0.18 | 0.22 | | 0.09 | 0.31 | 0.55 |
| Invertivores | Pantropical | HL | 0.26 | 0.16 | 0.4 | | 0.07 | 0.31 | 0.64 |
| Invertivores | Pantropical | OH | 0.11 | 0.07 | 0.08 | | 0.05 | 0.16 | 0.26 |
| Invertivores | Pantropical | COMB | 0.18 | 0.11 | 0.3 | | 0.05 | 0.22 | 0.44 |
| Invertivores | Neotropical | BL | 0.29 | 0.28 | 0.21 | | 0.19 | 0.36 | 0.53 |
| Invertivores | Neotropical | BLIUCN | 0.31 | 0.29 | 0.22 | | 0.19 | 0.38 | 0.58 |
| Invertivores | Neotropical | HL | 0.4 | 0.3 | 0.48 | | 0.22 | 0.4 | 0.95 |
| Invertivores | Neotropical | OH | 0.15 | 0.15 | 0.08 | | 0.09 | 0.21 | 0.28 |
| Invertivores | Neotropical | COMB | 0.27 | 0.21 | 0.36 | | 0.14 | 0.29 | 0.55 |
| Invertivores | Afrotropical | BL | 0.18 | 0.14 | 0.17 | | 0.09 | 0.2 | 0.52 |
| Invertivores | Afrotropical | BLIUCN | 0.2 | 0.15 | 0.2 | | 0.09 | 0.21 | 0.61 |
| Invertivores | Afrotropical | HL | 0.14 | 0.08 | 0.31 | | 0.06 | 0.14 | 0.3 |
| Invertivores | Afrotropical | OH | 0.05 | 0.05 | 0.01 | | 0.05 | 0.06 | 0.06 |
| Invertivores | Afrotropical | COMB | 0.1 | 0.06 | 0.27 | | 0.05 | 0.1 | 0.21 |
| Invertivores | Indomalayan | BL | 0.12 | 0.08 | 0.22 | | 0.06 | 0.11 | 0.36 |
| Invertivores | Indomalayan | BLIUCN | 0.12 | 0.08 | 0.19 | | 0.06 | 0.11 | 0.35 |
| Invertivores | Indomalayan | HL | 0.11 | 0.08 | 0.12 | | 0.06 | 0.11 | 0.35 |
| Invertivores | Indomalayan | OH | 0.08 | 0.06 | 0.07 | | 0.04 | 0.09 | 0.19 |
| Invertivores | Indomalayan | COMB | 0.09 | 0.06 | 0.1 | | 0.04 | 0.09 | 0.28 |
| Carnivores | Pantropical | BL | 2.72 | 2.54 | 2.14 | | 1.35 | 3.31 | 6.33 |
| Carnivores | Pantropical | BLIUCN | 2.52 | 2.2 | 2.16 | | 1.35 | 3.06 | 5.36 |
| Carnivores | Pantropical | HL | 2.57 | 2.41 | 2.13 | | 1.35 | 3 | 5.53 |
| Carnivores | Pantropical | OH | 1.78 | 1.69 | 1.17 | | 1.11 | 2.28 | 3.52 |
| Carnivores | Pantropical | COMB | 2.05 | 1.79 | 1.87 | | 1.18 | 2.49 | 4.3 |
| Carnivores | Neotropical | BL | 1.88 | 1.5 | 1.55 | | 1.18 | 2.45 | 3.81 |
| Carnivores | Neotropical | BLIUCN | 1.85 | 1.5 | 1.16 | | 1.19 | 2.42 | 3.83 |
| Carnivores | Neotropical | HL | 2.18 | 1.8 | 1.68 | | 1.22 | 2.76 | 4.81 |
| Carnivores | Neotropical | OH | 1.33 | 1.2 | 0.68 | | 1.02 | 1.62 | 2.47 |
| Carnivores | Neotropical | COMB | 1.75 | 1.42 | 1.37 | | 1.07 | 2.24 | 3.9 |
| Carnivores | Afrotropical | BL | 4.2 | 3.31 | 2.64 | | 2.78 | 4.81 | 8.23 |
| Carnivores | Afrotropical | BLIUCN | 3.63 | 2.78 | 3.19 | | 2.04 | 3.81 | 8.14 |
| Carnivores | Afrotropical | HL | 3.45 | 2.75 | 2.82 | | 2.19 | 3.58 | 7.79 |
| Carnivores | Afrotropical | OH | 2.61 | 2.23 | 1.43 | | 1.85 | 2.68 | 5.25 |
| Carnivores | Afrotropical | COMB | 2.67 | 2.02 | 2.6 | | 1.52 | 2.66 | 6.24 |
| Carnivores | Indomalayan | BL | 2.58 | 2.66 | 1.36 | | 2.2 | 3.35 | 4.33 |
| Carnivores | Indomalayan | BLIUCN | 2.5 | 2.74 | 1.46 | | 1.79 | 3.66 | 4.38 |
| Carnivores | Indomalayan | HL | 2.25 | 2.62 | 1.57 | | 1.71 | 2.9 | 3.92 |
| Carnivores | Indomalayan | OH | 1.68 | 1.95 | 1.05 | | 0.8 | 2.38 | 3.24 |
| Carnivores | Indomalayan | COMB | 1.91 | 2.11 | 1.45 | | 1.4 | 2.53 | 3.4 |

**Table S5 |** Relative change in community-weighted means of body mass (ΔCWMbm) between baselines and anthropogenic scenarios across tropical realms for each trophic guild: herbivores (>50% diet is plant-based), omnivores (<50% of any dietary item), invertivores (>50% diet is invertebrates), and carnivores (>50% diet is vertebrate-based). Scenarios include: Baseline reconstructed using Phylacine (BL), baseline reconstructed with IUCN range maps including extinct polygons (BLIUCN), only habitat loss (HL), only hunting (OH), and the present-day defaunated scenario combining both pressures (COMB). For pantropical total and individual realms (Neotropical, Afrotropical, Indomalayan), we report distribution statistics of relative CWMbm changes: mean relative change (ΔCWMbm), standard deviation (SD), first quartile (Q1), and third quartile (Q3). For each realm and scenario comparison, we report results from Wilcoxon signed-rank tests for testing differences in absolute CWMbm values: test statistic (W) and p-value. Asterisks indicate significance levels: *p < 0.05, **p < 0.01, ***p < 0.001.

| **Guild** | **Realm** | **Comparison** | **Mean** | | **SD** | **Q1** | **Q3** | **W** | **p-value** | **Sign.** |
| --- | --- | --- | --- | --- | --- | --- | --- | --- | --- | --- |
| Herbivores | Pantropical | BL - HL | -0.07 | 2.02 | | -0.48 | 0.03 | 60401269 | 0 | *** |
| Herbivores | Pantropical | BL - OH | -0.59 | 0.33 | | -0.79 | -0.43 | 77764279 | 0 | *** |
| Herbivores | Pantropical | BL - COMB | -0.46 | 1.55 | | -0.77 | -0.34 | 75228847 | 0 | *** |
| Herbivores | Neotropical | BL - HL | 0.15 | 2.18 | | -0.2 | 0.12 | 9726133 | 2.6e-15 | *** |
| Herbivores | Neotropical | BL - OH | -0.49 | 0.39 | | -0.67 | -0.36 | 17298201 | 0 | *** |
| Herbivores | Neotropical | BL - COMB | -0.3 | 1.91 | | -0.56 | -0.25 | 15895854 | 0 | *** |
| Herbivores | Afrotropical | BL - HL | -0.28 | 2.45 | | -0.65 | -0.12 | 5991325 | 0 | *** |
| Herbivores | Afrotropical | BL - OH | -0.7 | 0.2 | | -0.85 | -0.59 | 6643709 | 0 | *** |
| Herbivores | Afrotropical | BL - COMB | -0.61 | 1.45 | | -0.85 | -0.52 | 6537971 | 0 | *** |
| Herbivores | Indomalayan | BL - HL | -0.27 | 0.41 | | -0.54 | -0.07 | 3858804 | 9.5e-293 | *** |
| Herbivores | Indomalayan | BL - OH | -0.65 | 0.28 | | -0.86 | -0.52 | 4333142 | 0 | *** |
| Herbivores | Indomalayan | BL - COMB | -0.62 | 0.31 | | -0.82 | -0.48 | 4298301 | 0 | *** |
| Carnivores | Pantropical | BL - HL | 0.09 | 1.2 | | -0.25 | 0.06 | 41484782 | 4.3e-131 | *** |
| Carnivores | Pantropical | BL - OH | -0.27 | 0.43 | | -0.43 | -0.13 | 68521040 | 0 | *** |
| Carnivores | Pantropical | BL - COMB | -0.14 | 0.83 | | -0.41 | -0.08 | 61149194 | 0 | *** |
| Carnivores | Neotropical | BL - HL | 0.31 | 1.57 | | -0.04 | 0.19 | 5474343 | 4.6e-55 | *** |
| Carnivores | Neotropical | BL - OH | -0.23 | 0.32 | | -0.35 | -0.11 | 16007901 | 0 | *** |
| Carnivores | Neotropical | BL - COMB | 0.03 | 1 | | -0.24 | -0.03 | 12415793 | 2.1e-211 | *** |
| Carnivores | Afrotropical | BL - HL | -0.13 | 0.66 | | -0.38 | 0 | 5272164 | 1.7e-267 | *** |
| Carnivores | Afrotropical | BL - OH | -0.3 | 0.61 | | -0.49 | -0.21 | 6423159 | 0 | *** |
| Carnivores | Afrotropical | BL - COMB | -0.33 | 0.65 | | -0.56 | -0.22 | 6242130 | 0 | *** |
| Carnivores | Indomalayan | BL - HL | -0.09 | 0.54 | | -0.28 | 0.03 | 2371364 | 1.3e-97 | *** |
| Carnivores | Indomalayan | BL - OH | -0.32 | 0.3 | | -0.48 | -0.15 | 3063734 | 0 | *** |
| Carnivores | Indomalayan | BL - COMB | -0.23 | 0.52 | | -0.39 | -0.11 | 2884906 | 7.7e-266 | *** |
| Omnivores | Pantropical | BL - HL | 1.69 | 12.19 | | -0.05 | 0.44 | 24308796 | 2.1e-194 | *** |
| Omnivores | Pantropical | BL - OH | 0.53 | 12.44 | | -0.57 | -0.16 | 68322152 | 0 | *** |
| Omnivores | Pantropical | BL - COMB | 1.14 | 12.04 | | -0.42 | 0.01 | 54405791 | 0 | *** |
| Omnivores | Neotropical | BL - HL | 0.74 | 3.2 | | -0.03 | 0.56 | 5295542 | 1.6e-111 | *** |
| Omnivores | Neotropical | BL - OH | -0.23 | 0.64 | | -0.44 | -0.12 | 15503784 | 0 | *** |
| Omnivores | Neotropical | BL - COMB | 0.29 | 2.83 | | -0.31 | 0.13 | 11270654 | 2.5e-87 | *** |
| Omnivores | Afrotropical | BL - HL | 1.11 | 15.53 | | -0.12 | 0.22 | 2486556 | 8.7e-17 | *** |
| Omnivores | Afrotropical | BL - OH | -0.36 | 0.5 | | -0.58 | -0.24 | 6055398 | 0 | *** |
| Omnivores | Afrotropical | BL - COMB | 0.72 | 15.54 | | -0.43 | -0.08 | 5397552 | 2.8e-267 | *** |
| Omnivores | Indomalayan | BL - HL | 4.34 | 17.46 | | -0.03 | 0.64 | 1138214 | 5.3e-79 | *** |
| Omnivores | Indomalayan | BL - OH | 3.17 | 25.52 | | -0.68 | -0.12 | 3458419 | 1.9e-249 | *** |
| Omnivores | Indomalayan | BL - COMB | 3.41 | 17.2 | | -0.59 | 0 | 2799036 | 1.1e-83 | *** |
| Invertivores | Pantropical | BL - HL | 0.21 | 1.7 | | -0.15 | 0.14 | 38405717 | 0.31 |  |
| Invertivores | Pantropical | BL - OH | -0.4 | 0.33 | | -0.63 | -0.2 | 76013984 | 0 | *** |
| Invertivores | Pantropical | BL - COMB | -0.12 | 1.41 | | -0.44 | -0.09 | 66572385 | 0 | *** |
| Invertivores | Neotropical | BL - HL | 0.44 | 1.53 | | -0.02 | 0.31 | 5010490 | 5.5e-171 | *** |
| Invertivores | Neotropical | BL - OH | -0.4 | 0.28 | | -0.59 | -0.24 | 17030135 | 0 | *** |
| Invertivores | Neotropical | BL - COMB | -0.03 | 1.13 | | -0.37 | -0.06 | 14082872 | 0 | *** |
| Invertivores | Afrotropical | BL - HL | -0.04 | 2.17 | | -0.58 | 0.01 | 5143170 | 4.0e-183 | *** |
| Invertivores | Afrotropical | BL - OH | -0.56 | 0.29 | | -0.75 | -0.45 | 6609778 | 0 | *** |
| Invertivores | Afrotropical | BL - COMB | -0.26 | 1.9 | | -0.67 | -0.19 | 6150700 | 0 | *** |
| Invertivores | Indomalayan | BL - HL | 0.08 | 1.23 | | -0.12 | 0.09 | 2396402 | 5.8e-07 | *** |
| Invertivores | Indomalayan | BL - OH | -0.21 | 0.38 | | -0.41 | -0.09 | 4027817 | 0 | *** |
| Invertivores | Indomalayan | BL - COMB | -0.12 | 1.16 | | -0.33 | -0.05 | 3712917 | 7.8e-247 | *** |
| Herbivores | Pantropical | BLIUCN - HL | 0.04 | 1.77 | | -0.21 | 0.02 | 50413856 | 9.8e-248 | *** |
| Herbivores | Pantropical | BLIUCN - OH | -0.55 | 0.26 | | -0.71 | -0.41 | 77924333 | 0 | *** |
| Herbivores | Pantropical | BLIUCN - COMB | -0.42 | 1.11 | | -0.66 | -0.32 | 75279674 | 0 | *** |
| Herbivores | Neotropical | BLIUCN - HL | 0.13 | 1.61 | | -0.11 | 0.02 | 9490911 | 2.7e-27 | *** |
| Herbivores | Neotropical | BLIUCN - OH | -0.5 | 0.3 | | -0.65 | -0.35 | 17361828 | 0 | *** |
| Herbivores | Neotropical | BLIUCN - COMB | -0.32 | 1.01 | | -0.53 | -0.27 | 16244851 | 0 | *** |
| Herbivores | Afrotropical | BLIUCN - HL | -0.11 | 2.51 | | -0.41 | 0 | 5361628 | 1.9e-276 | *** |
| Herbivores | Afrotropical | BLIUCN - OH | -0.63 | 0.17 | | -0.75 | -0.52 | 6651787 | 0 | *** |
| Herbivores | Afrotropical | BLIUCN - COMB | -0.53 | 1.58 | | -0.75 | -0.45 | 6502033 | 0 | *** |
| Herbivores | Indomalayan | BLIUCN - HL | 0.03 | 0.46 | | -0.11 | 0.07 | 2524685 | 9.7e-15 | *** |
| Herbivores | Indomalayan | BLIUCN - OH | -0.55 | 0.25 | | -0.73 | -0.45 | 4330330 | 0 | *** |
| Herbivores | Indomalayan | BLIUCN - COMB | -0.5 | 0.34 | | -0.68 | -0.37 | 4277170 | 0 | *** |
| Carnivores | Pantropical | BLIUCN - HL | 0.12 | 1.47 | | -0.08 | 0.07 | 31255058 | 0.013 | * |
| Carnivores | Pantropical | BLIUCN - OH | -0.24 | 0.22 | | -0.35 | -0.1 | 67129978 | 0 | *** |
| Carnivores | Pantropical | BLIUCN - COMB | -0.11 | 1.36 | | -0.31 | -0.07 | 61172508 | 0 | *** |
| Carnivores | Neotropical | BLIUCN - HL | 0.27 | 2.05 | | 0 | 0.14 | 4237129 | 1.7e-114 | *** |
| Carnivores | Neotropical | BLIUCN - OH | -0.25 | 0.2 | | -0.3 | -0.12 | 16858901 | 0 | *** |
| Carnivores | Neotropical | BLIUCN - COMB | 0.01 | 1.9 | | -0.2 | -0.05 | 13026692 | 9e-282 | *** |
| Carnivores | Afrotropical | BLIUCN - HL | 0.02 | 0.44 | | -0.12 | 0.09 | 3429026 | 8e-15 | *** |
| Carnivores | Afrotropical | BLIUCN - OH | -0.18 | 0.23 | | -0.35 | -0.05 | 5828324 | 0 | *** |
| Carnivores | Afrotropical | BLIUCN - COMB | -0.24 | 0.41 | | -0.39 | -0.11 | 6176681 | 0 | *** |
| Carnivores | Indomalayan | BLIUCN - HL | -0.07 | 0.47 | | -0.26 | 0 | 2288623 | 4.9e-129 | *** |
| Carnivores | Indomalayan | BLIUCN - OH | -0.29 | 0.22 | | -0.39 | -0.13 | 2876164 | 0 | *** |
| Carnivores | Indomalayan | BLIUCN - COMB | -0.21 | 0.46 | | -0.35 | -0.1 | 2787943 | 0 | *** |
| Omnivores | Pantropical | BLIUCN - HL | 0.99 | 8.89 | | -0.03 | 0.16 | 26452846 | 1e-72 | *** |
| Omnivores | Pantropical | BLIUCN - OH | -0.38 | 0.38 | | -0.57 | -0.21 | 72675217 | 0 | *** |
| Omnivores | Pantropical | BLIUCN - COMB | 0.48 | 8.64 | | -0.42 | -0.07 | 59880549 | 0 | *** |
| Omnivores | Neotropical | BLIUCN - HL | 0.51 | 3.1 | | -0.02 | 0.17 | 6214478 | 1.3e-30 | *** |
| Omnivores | Neotropical | BLIUCN - OH | -0.34 | 0.35 | | -0.46 | -0.18 | 17253376 | 0 | *** |
| Omnivores | Neotropical | BLIUCN - COMB | 0.12 | 2.82 | | -0.33 | -0.07 | 13430932 | 8.1e-291 | *** |
| Omnivores | Afrotropical | BLIUCN - HL | 0.91 | 13.93 | | -0.1 | 0.06 | 2794946 | 0.06 |  |
| Omnivores | Afrotropical | BLIUCN - OH | -0.4 | 0.48 | | -0.59 | -0.28 | 6180912 | 0 | *** |
| Omnivores | Afrotropical | BLIUCN - COMB | 0.56 | 13.94 | | -0.43 | -0.14 | 5738869 | 0 | *** |
| Omnivores | Indomalayan | BLIUCN - HL | 2.08 | 8.66 | | -0.01 | 0.42 | 1065117 | 7.3e-74 | *** |
| Omnivores | Indomalayan | BLIUCN - OH | -0.44 | 0.29 | | -0.67 | -0.19 | 3558930 | 0 | *** |
| Omnivores | Indomalayan | BLIUCN - COMB | 1.12 | 7.79 | | -0.57 | 0 | 2818059 | 1e-128 | *** |
| Invertivores | Pantropical | BLIUCN - HL | 0.16 | 1.54 | | -0.11 | 0.05 | 41019708 | 9e-21 | *** |
| Invertivores | Pantropical | BLIUCN - OH | -0.41 | 0.36 | | -0.64 | -0.2 | 76565700 | 0 | *** |
| Invertivores | Pantropical | BLIUCN - COMB | -0.15 | 1.27 | | -0.44 | -0.11 | 68903475 | 0 | *** |
| Invertivores | Neotropical | BLIUCN - HL | 0.38 | 1.43 | | -0.01 | 0.2 | 6155688 | 4e-72 | *** |
| Invertivores | Neotropical | BLIUCN - OH | -0.42 | 0.27 | | -0.61 | -0.25 | 17144260 | 0 | *** |
| Invertivores | Neotropical | BLIUCN - COMB | -0.07 | 1.05 | | -0.38 | -0.1 | 14676746 | 0 | *** |
| Invertivores | Afrotropical | BLIUCN - HL | -0.09 | 2.09 | | -0.61 | 0 | 5102887 | 2.6e-268 | *** |
| Invertivores | Afrotropical | BLIUCN - OH | -0.58 | 0.26 | | -0.76 | -0.47 | 6629288 | 0 | *** |
| Invertivores | Afrotropical | BLIUCN - COMB | -0.3 | 1.84 | | -0.69 | -0.21 | 6272897 | 0 | *** |
| Invertivores | Indomalayan | BLIUCN - HL | 0.05 | 0.64 | | -0.05 | 0.05 | 2174967 | 0.562 |  |
| Invertivores | Indomalayan | BLIUCN - OH | -0.2 | 0.5 | | -0.38 | -0.09 | 4104734 | 0 | *** |
| Invertivores | Indomalayan | BLIUCN - COMB | -0.15 | 0.59 | | -0.28 | -0.07 | 3905411 | 0 | *** |

**Table S6 |** Total mammalian biomass (in megatons) across biogeographic realms and the pantropical forest zone under five scenarios. Scenarios include: Baseline reconstructed using Phylacine (BL), Baseline using IUCN ranges (BLIUCN), Habitat loss (HL), Overhunting (OH), and the present-day defaunated scenario combining both pressures (COMB). For each realm (Neotropical, Afrotropical, Indomalayan) and the combined pantropical zone, we report: mean biomass, 95% confidence intervals (CI lower 95, CI upper 95), and number of 2500 km2 grid cells per realm. Cell counts indicate the number of spatial grid cells within each realm (or pantropical total) included in the analysis.

| **Realm** | **Scenario** | **Biomass** | **CI 95 lower** | **CI 95 upper** | | **Cells** |
| --- | --- | --- | --- | --- | --- | --- |
| Pantropical | BL | 122.35 | 18.3 | 264.53 | 12492 | |
| Pantropical | BLIUCN | 87.28 | 12.77 | 195.71 | 12492 | |
| Pantropical | HL | 73 | 10.4 | 164.09 | 12492 | |
| Pantropical | OH | 97.37 | 3.98 | 254.11 | 12492 | |
| Pantropical | COMB | 62.83 | 3.42 | 156.36 | 12492 | |
| Neotropical | BL | 33.91 | 2.51 | 82.79 | 5897 | |
| Neotropical | BLIUCN | 31.15 | 2.45 | 75.28 | 5897 | |
| Neotropical | HL | 25.84 | 2.01 | 62.75 | 5897 | |
| Neotropical | OH | 42.42 | 1.27 | 115.86 | 5897 | |
| Neotropical | COMB | 26.22 | 1.01 | 68.15 | 5897 | |
| Afrotropical | BL | 48.77 | 9.93 | 97.7 | 3647 | |
| Afrotropical | BLIUCN | 33.06 | 6.35 | 69.25 | 3647 | |
| Afrotropical | HL | 28.45 | 4.99 | 60.72 | 3647 | |
| Afrotropical | OH | 33.81 | 2.13 | 82.46 | 3647 | |
| Afrotropical | COMB | 23.92 | 1.97 | 56.34 | 3647 | |
| Indomalayan | BL | 39.67 | 5.87 | 84.04 | 2948 | |
| Indomalayan | BLIUCN | 23.08 | 3.96 | 51.19 | 2948 | |
| Indomalayan | HL | 18.71 | 3.41 | 40.62 | 2948 | |
| Indomalayan | OH | 21.14 | 0.58 | 55.79 | 2948 | |
| Indomalayan | COMB | 12.69 | 0.44 | 31.87 | 2948 | |

**Table S7 |** Relative biomass change (ΔBiomass) between baseline scenarios and anthropogenic scenarios across tropical realms. Scenarios include: Baseline reconstructed using Phylacine (BL), baseline reconstructed with IUCN range maps including extinct polygons (BLIUCN), Habitat loss (HL), Overhunting (OH), and the present-day defaunated scenario combining both pressures (COMB). For all the pantropical forest zone and individual realms (Neotropical, Afrotropical, Indomalayan), we report distribution statistics of percentage biomass changes: relative change (ΔBiomass) using the mean density predictions, standard deviation (SD), first quartile (Q1), and third quartile (Q3). For each realm and scenario comparison, we report results from Wilcoxon signed-rank tests for testing differences in absolute biomass levels: test statistic (W) and p-value. Asterisks indicate significance levels: *p < 0.05, **p < 0.01, ***p < 0.001.

| **Realm** | **Comparison** | **Mean** | | **SD** | **Q1** | **Q3** | **W** | ***p-value*** | **Sign.** |
| --- | --- | --- | --- | --- | --- | --- | --- | --- | --- |
| Pantropical | BL - HL | -0.33 | 0.34 | | -0.6 | -0.08 | 74217220 | 0 | *** |
| Pantropical | BL - OH | 0.05 | 0.92 | | -0.43 | 0.3 | 51406289 | 1.6e-207 | *** |
| Pantropical | BL - COMB | -0.36 | 0.41 | | -0.69 | -0.09 | 71281684 | 0 | *** |
| Neotropical | BL - HL | -0.22 | 0.29 | | -0.39 | -0.02 | 15757081 | 0 | *** |
| Neotropical | BL - OH | 0.37 | 1 | | -0.03 | 0.54 | 3740429 | 0 | *** |
| Neotropical | BL - COMB | -0.19 | 0.38 | | -0.47 | 0.09 | 13230904 | 1e-263 | *** |
| Afrotropical | BL - HL | -0.42 | 0.33 | | -0.64 | -0.22 | 6496286 | 0 | *** |
| Afrotropical | BL - OH | -0.26 | 0.74 | | -0.5 | -0.14 | 6078581 | 0 | *** |
| Afrotropical | BL - COMB | -0.51 | 0.32 | | -0.73 | -0.34 | 6556785 | 0 | *** |
| Indomalayan | BL - HL | -0.45 | 0.35 | | -0.72 | -0.2 | 4272427 | 0 | *** |
| Indomalayan | BL - OH | -0.21 | 0.72 | | -0.6 | -0.02 | 3904513 | 5e-307 | *** |
| Indomalayan | BL - COMB | -0.54 | 0.44 | | -0.83 | -0.36 | 4256172 | 0 | *** |
| Pantropical | BLIUCN - HL | -0.14 | 0.37 | | -0.34 | 0.01 | 59017860 | 0 | *** |
| Pantropical | BLIUCN - OH | 0.35 | 1.07 | | -0.1 | 0.51 | 25911357 | 7.5e-232 | *** |
| Pantropical | BLIUCN - COMB | -0.2 | 0.43 | | -0.51 | 0.07 | 63098742 | 0 | *** |
| Neotropical | BLIUCN - HL | -0.15 | 0.3 | | -0.32 | 0 | 12733586 | 2.6e-220 | *** |
| Neotropical | BLIUCN - OH | 0.49 | 1.12 | | 0.07 | 0.67 | 2216347 | 0 | *** |
| Neotropical | BLIUCN - COMB | -0.12 | 0.39 | | -0.42 | 0.16 | 11590597 | 1.1e-108 | *** |
| Afrotropical | BLIUCN - HL | -0.09 | 0.47 | | -0.33 | 0.01 | 4888204 | 3.9e-139 | *** |
| Afrotropical | BLIUCN - OH | 0.21 | 0.97 | | -0.18 | 0.33 | 3072628 | 6.7e-05 | *** |
| Afrotropical | BLIUCN - COMB | -0.22 | 0.44 | | -0.49 | -0.04 | 5806605 | 0 | *** |
| Indomalayan | BLIUCN - HL | -0.17 | 0.35 | | -0.37 | 0.01 | 3541324 | 4.1e-193 | *** |
| Indomalayan | BLIUCN - OH | 0.24 | 1.04 | | -0.2 | 0.39 | 2501175 | 1.3e-12 | *** |
| Indomalayan | BLIUCN - COMB | -0.33 | 0.47 | | -0.65 | -0.1 | 4064565 | 0 | *** |

**Table S8 |** Comparison of biomass between the overhunting (OH) and habitat loss (HL) scenarios across biogeographic realms. The relative change (ΔBiomass) for each community was calculated as Δ= ((Biomass OH – Biomass HL) / Biomass HL), representing the relative change when using HL as the reference. Reported statistics include the mean, standard deviation (SD), and interquartile range (Q1, Q3) of ΔBiomass. For each realm and scenario comparison, we report results from Wilcoxon signed-rank tests for testing differences in biomass levels between OH and HL scenarios: test statistic (W) and p-value. Asterisks indicate significance levels: *p < 0.05, **p < 0.01, ***p < 0.001.

| **Realm** | **Comparison** | | **Mean** | **SD** | **Q1** | **Q3** | **W** | ***p-value*** | **Sign.** |
| --- | --- | --- | --- | --- | --- | --- | --- | --- | --- |
| Pantropical | OH - HL | 1.07 | | 7.64 | 0.05 | 1.02 | 13133260 | 0 | *** |
| Neotropical | OH - HL | 1.5 | | 10.86 | 0.2 | 1.32 | 967513 | 0 | *** |
| Afrotropical | OH - HL | 0.59 | | 2.02 | -0.05 | 0.7 | 1634075 | 5.6e-156 | *** |
| Indomalayan | OH - HL | 0.79 | | 2.41 | -0.06 | 0.86 | 1376014 | 1.1e-66 | *** |

**Table S9 |** Biomass (in megaton) by mammalian order, realm, and scenario. Values represent mean biomass with 95% confidence intervals (CI lower 95, CI upper 95). Scenarios include: baseline reconstructed using Phylacine natural ranges (BL), baseline using IUCN ranges including extinct polygons (BLIUCN), only habitat loss (HL), only hunting (OH), and a present-day defaunated scenario combining habitat loss and hunting (COMB). The number of 2500 km2 grid cells (n) per realm is reported. Complete table with all values is available as xlsx file in Supplementary Data S9.

**Table S10 |** Species-level mammalian biomass (kiloton) by scenario across the pantropical forest zone. For each species, we report: mean biomass with 95% confidence intervals (CI lower 95, CI upper 95), taxonomic order, and number of grid cells where the species is present in each scenario. Scenarios include: Baseline reconstructed using Phylacine (BL), Baseline using IUCN ranges (BLIUCN), only habitat loss (HL), only hunting (OH), and the present-day defaunated scenario combining both pressures (COMB). The cell counts correspond only to the species' range within the pantropical forest zone per scenario, not its entire geographic distribution. Consequently, the biomass estimates represent only the portion of the species' total biomass occurring within the pantropical forest zone. Complete table with all values is available as xlsx file in Supplementary Data S10.
