# Supplementary material
Source: Research Square preprint supplement (doi:10.21203/rs.3.rs-9644263/v1)
Supplement: Supplementary file 3 [file 6c27b8b35f33409c53164d00.xlsx]

## Sheet: Sheet1
Order	Species	Scenario	Biomass_ktons	Biomass_lw95	Biomass_up95	NCells
Rodentia	Abditomys latidens	Baseline (Phylacine)	0.959456	0.342766	1.57615	20
Rodentia	Abditomys latidens	Baseline (IUCN)	0.153462	0.0555287	0.251395	3
Rodentia	Abditomys latidens	Habitat loss (HL)	0.052864	0.018828	0.0868999	3
Rodentia	Abditomys latidens	Overhunting (OH)	0.216855	0.0082752	0.425435	3
Rodentia	Abditomys latidens	Habitat loss + Overhunting (COMB)	0.0652838	0.00372296	0.126845	3
Rodentia	Abeomelomys sevia	Baseline (Phylacine)	0.554964	0.168472	0.941457	29
Rodentia	Abeomelomys sevia	Baseline (IUCN)	0.316546	0.0958928	0.5372	15
Rodentia	Abeomelomys sevia	Habitat loss (HL)	0.193036	0.0583665	0.327705	15
Rodentia	Abeomelomys sevia	Overhunting (OH)	0.737097	0.00509942	1.47004	15
Rodentia	Abeomelomys sevia	Habitat loss + Overhunting (COMB)	0.26551	0.00211845	0.529804	15
Rodentia	Abrawayaomys ruschii	Baseline (Phylacine)	1.41386	0.483608	2.34411	70
Rodentia	Abrawayaomys ruschii	Baseline (IUCN)	0.831152	0.283898	1.37841	39
Rodentia	Abrawayaomys ruschii	Habitat loss (HL)	0.288901	0.0989222	0.478879	39
Rodentia	Abrawayaomys ruschii	Overhunting (OH)	1.29529	0.0953836	2.4952	39
Rodentia	Abrawayaomys ruschii	Habitat loss + Overhunting (COMB)	0.449575	0.0348873	0.864262	39
Rodentia	Abrocoma boliviensis	Baseline (Phylacine)	0.0348488	0.0110607	0.058637	3
Rodentia	Abrocoma boliviensis	Baseline (IUCN)	0.0348488	0.0110607	0.058637	3
Rodentia	Abrocoma boliviensis	Habitat loss (HL)	0.0542626	0.0171002	0.0914249	3
Rodentia	Abrocoma boliviensis	Overhunting (OH)	0.175788	0.0140111	0.337566	3
Rodentia	Abrocoma boliviensis	Habitat loss + Overhunting (COMB)	0.0630989	0.00547714	0.120721	3
Rodentia	Abrocoma cinerea	Baseline (Phylacine)	0.000261558	8.60297e-05	0.000437087	52
Rodentia	Abrocoma cinerea	Baseline (IUCN)	0.000261558	8.60297e-05	0.000437087	29
Rodentia	Abrocoma cinerea	Habitat loss (HL)	0	0	0	29
Rodentia	Abrocoma cinerea	Overhunting (OH)	2.52893	0.190481	4.86738	29
Rodentia	Abrocoma cinerea	Habitat loss + Overhunting (COMB)	0	0	0	29
Rodentia	Abrothrix andinus	Baseline (Phylacine)	0.472446	0	1.02393	28
Rodentia	Abrothrix andinus	Baseline (IUCN)	0.154902	0	0.335605	14
Rodentia	Abrothrix andinus	Habitat loss (HL)	0.0217719	0	0.0471791	14
Rodentia	Abrothrix andinus	Overhunting (OH)	1.1029	0	2.56009	14
Rodentia	Abrothrix andinus	Habitat loss + Overhunting (COMB)	0.0340692	0	0.0791468	14
Rodentia	Abrothrix illutea	Baseline (Phylacine)	0.0918256	0	0.184843	15
Rodentia	Abrothrix illutea	Baseline (IUCN)	0.0771375	0	0.155326	9
Rodentia	Abrothrix illutea	Habitat loss (HL)	0.165354	0	0.333138	9
Rodentia	Abrothrix illutea	Overhunting (OH)	0.589368	0	1.29865	9
Rodentia	Abrothrix illutea	Habitat loss + Overhunting (COMB)	0.283408	0	0.62504	9
Rodentia	Abrothrix jelskii	Baseline (Phylacine)	0.313839	0	0.68018	51
Rodentia	Abrothrix jelskii	Baseline (IUCN)	0.243158	0	0.527047	27
Rodentia	Abrothrix jelskii	Habitat loss (HL)	0.412283	0	0.894152	27
Rodentia	Abrothrix jelskii	Overhunting (OH)	2.33279	0	5.41423	27
Rodentia	Abrothrix jelskii	Habitat loss + Overhunting (COMB)	0.646494	0	1.50643	27
Chiroptera	Acerodon celebensis	Baseline (Phylacine)	0.134965	0	0.30687	73
Chiroptera	Acerodon celebensis	Baseline (IUCN)	0.134965	0	0.30687	73
Chiroptera	Acerodon celebensis	Habitat loss (HL)	0.090529	0	0.205823	73
Chiroptera	Acerodon celebensis	Overhunting (OH)	0.246149	0	0.601529	73
Chiroptera	Acerodon celebensis	Habitat loss + Overhunting (COMB)	0.116338	0	0.284079	73
Chiroptera	Acerodon jubatus	Baseline (Phylacine)	0.198037	0	0.450364	91
Chiroptera	Acerodon jubatus	Baseline (IUCN)	0.163223	0	0.371166	72
Chiroptera	Acerodon jubatus	Habitat loss (HL)	0.0727647	0	0.165542	68
Chiroptera	Acerodon jubatus	Overhunting (OH)	0.207707	0	0.512618	68
Chiroptera	Acerodon jubatus	Habitat loss + Overhunting (COMB)	0.0703616	0	0.17345	68
Chiroptera	Acerodon leucotis	Baseline (Phylacine)	0.00365317	0	0.00827645	3
Chiroptera	Acerodon leucotis	Baseline (IUCN)	0.00365317	0	0.00827645	3
Chiroptera	Acerodon leucotis	Habitat loss (HL)	0.00324326	0	0.00734576	3
Chiroptera	Acerodon leucotis	Overhunting (OH)	0.0105249	0	0.0257914	3
Chiroptera	Acerodon leucotis	Habitat loss + Overhunting (COMB)	0.00423484	0	0.0103732	3
Chiroptera	Acerodon mackloti	Baseline (Phylacine)	0.0323592	0	0.0743157	32
Chiroptera	Acerodon mackloti	Baseline (IUCN)	0.0298315	0	0.0685249	29
Chiroptera	Acerodon mackloti	Habitat loss (HL)	0.0287581	0	0.0660294	29
Chiroptera	Acerodon mackloti	Overhunting (OH)	0.0911818	0	0.224936	29
Chiroptera	Acerodon mackloti	Habitat loss + Overhunting (COMB)	0.0360855	0	0.0890199	29
Carnivora	Acinonyx jubatus	Baseline (Phylacine)	1.85027	0	5.03362	2918
Carnivora	Acinonyx jubatus	Baseline (IUCN)	1.75948	0	4.78683	2489
Carnivora	Acinonyx jubatus	Habitat loss (HL)	0.418376	0	1.13694	250
Carnivora	Acinonyx jubatus	Overhunting (OH)	0.551868	0	1.57984	250
Carnivora	Acinonyx jubatus	Habitat loss + Overhunting (COMB)	0.370602	0	1.06176	250
Rodentia	Acomys cineraceus	Baseline (Phylacine)	1.28081	0.365215	2.1964	144
Rodentia	Acomys cineraceus	Baseline (IUCN)	1.08436	0.309305	1.85941	124
Rodentia	Acomys cineraceus	Habitat loss (HL)	1.46451	0.417888	2.51113	124
Rodentia	Acomys cineraceus	Overhunting (OH)	3.5575	0.00897737	7.14014	124
Rodentia	Acomys cineraceus	Habitat loss + Overhunting (COMB)	2.42946	0.00520109	4.88094	124
Rodentia	Acomys ignitus	Baseline (Phylacine)	0.161845	0.0402492	0.28344	14
Rodentia	Acomys ignitus	Baseline (IUCN)	0.125375	0.0311855	0.219565	9
Rodentia	Acomys ignitus	Habitat loss (HL)	0.116537	0.0289716	0.204103	9
Rodentia	Acomys ignitus	Overhunting (OH)	0.3386	0.00223137	0.686586	9
Rodentia	Acomys ignitus	Habitat loss + Overhunting (COMB)	0.192677	0.00159516	0.388896	9
Rodentia	Acomys johannis	Baseline (Phylacine)	0	0	0	10
Rodentia	Acomys johannis	Baseline (IUCN)	0	0	0	2
Rodentia	Acomys johannis	Habitat loss (HL)	0	0	0	2
Rodentia	Acomys johannis	Overhunting (OH)	0.0656747	0	0.132612	2
Rodentia	Acomys johannis	Habitat loss + Overhunting (COMB)	0	0	0	2
Rodentia	Acomys kempi	Baseline (Phylacine)	0.216087	0.0502076	0.381967	22
Rodentia	Acomys kempi	Baseline (IUCN)	0.145528	0.0338111	0.257245	8
Rodentia	Acomys kempi	Habitat loss (HL)	0.0795207	0.0184779	0.140564	8
Rodentia	Acomys kempi	Overhunting (OH)	0.266772	0.00039719	0.544652	8
Rodentia	Acomys kempi	Habitat loss + Overhunting (COMB)	0.133935	0	0.274704	8
Rodentia	Acomys louisae	Baseline (Phylacine)	0.0542386	0.0111676	0.0973096	3
Rodentia	Acomys louisae	Baseline (IUCN)	0.0542386	0.0111676	0.0973096	3
Rodentia	Acomys louisae	Habitat loss (HL)	0.0197445	0.00405394	0.0354351	3
Rodentia	Acomys louisae	Overhunting (OH)	0.0816734	0	0.170116	3
Rodentia	Acomys louisae	Habitat loss + Overhunting (COMB)	0.0294525	0	0.0612781	3
Rodentia	Acomys percivali	Baseline (Phylacine)	0.252254	0.0396551	0.464854	36
Rodentia	Acomys percivali	Baseline (IUCN)	0.158079	0.0248585	0.2913	15
Rodentia	Acomys percivali	Habitat loss (HL)	0.131533	0.0206581	0.242408	15
Rodentia	Acomys percivali	Overhunting (OH)	0.493125	0	1.04211	15
Rodentia	Acomys percivali	Habitat loss + Overhunting (COMB)	0.230204	0	0.487297	15
Rodentia	Acomys spinosissimus	Baseline (Phylacine)	5.79779	0	17.5074	505
Rodentia	Acomys spinosissimus	Baseline (IUCN)	0.27063	0	0.816966	29
Rodentia	Acomys spinosissimus	Habitat loss (HL)	0.139311	0	0.420531	29
Rodentia	Acomys spinosissimus	Overhunting (OH)	0.947722	0	2.97842	29
Rodentia	Acomys spinosissimus	Habitat loss + Overhunting (COMB)	0.246385	0	0.774594	29
Rodentia	Acomys wilsoni	Baseline (Phylacine)	0.685871	0.108412	1.26333	107
Rodentia	Acomys wilsoni	Baseline (IUCN)	0.611089	0.0966746	1.1255	82
Rodentia	Acomys wilsoni	Habitat loss (HL)	0.454976	0.0717722	0.83818	82
Rodentia	Acomys wilsoni	Overhunting (OH)	2.4849	0	5.19354	82
Rodentia	Acomys wilsoni	Habitat loss + Overhunting (COMB)	0.819938	0	1.71901	82
Rodentia	Aegialomys xanthaeolus	Baseline (Phylacine)	2.61641	0	5.54077	77
Rodentia	Aegialomys xanthaeolus	Baseline (IUCN)	1.6985	0	3.59822	61
Rodentia	Aegialomys xanthaeolus	Habitat loss (HL)	1.50558	0	3.19265	61
Rodentia	Aegialomys xanthaeolus	Overhunting (OH)	10.2204	0	23.3573	61
Rodentia	Aegialomys xanthaeolus	Habitat loss + Overhunting (COMB)	1.81075	0	4.12577	61
Rodentia	Aepeomys lugens	Baseline (Phylacine)	0.0901355	0.0309406	0.14933	24
Rodentia	Aepeomys lugens	Baseline (IUCN)	0.0630228	0.0216425	0.104403	13
Rodentia	Aepeomys lugens	Habitat loss (HL)	0.0718691	0.0247209	0.119017	13
Rodentia	Aepeomys lugens	Overhunting (OH)	0.350681	0.0262824	0.675079	13
Rodentia	Aepeomys lugens	Habitat loss + Overhunting (COMB)	0.100818	0.00766148	0.193975	13
Rodentia	Aepeomys reigi	Baseline (Phylacine)	0.0365225	0.012544	0.060501	20
Rodentia	Aepeomys reigi	Baseline (IUCN)	0.019918	0.00682449	0.0330114	8
Rodentia	Aepeomys reigi	Habitat loss (HL)	0.0194286	0.00666954	0.0321877	8
Rodentia	Aepeomys reigi	Overhunting (OH)	0.229187	0.0172481	0.441126	8
Rodentia	Aepeomys reigi	Habitat loss + Overhunting (COMB)	0.027495	0.00220738	0.0527826	8
Cetartiodactyla	Aepyceros melampus	Baseline (Phylacine)	38.3035	14.4966	62.1104	826
Cetartiodactyla	Aepyceros melampus	Baseline (IUCN)	36.6907	13.8867	59.4947	767
Cetartiodactyla	Aepyceros melampus	Habitat loss (HL)	86.4883	32.685	140.292	767
Cetartiodactyla	Aepyceros melampus	Overhunting (OH)	109.654	11.6818	210.204	767
Cetartiodactyla	Aepyceros melampus	Habitat loss + Overhunting (COMB)	61.2024	6.57786	117.234	767
Rodentia	Aeretes melanopterus	Baseline (Phylacine)	0.279461	0.0772928	0.48163	49
Rodentia	Aeretes melanopterus	Baseline (IUCN)	0.228343	0.0630983	0.393587	33
Rodentia	Aeretes melanopterus	Habitat loss (HL)	0.215076	0.0592933	0.37086	33
Rodentia	Aeretes melanopterus	Overhunting (OH)	1.19091	0.00232095	2.38269	33
Rodentia	Aeretes melanopterus	Habitat loss + Overhunting (COMB)	0.278099	0.000769372	0.55561	33
Rodentia	Aeromys tephromelas	Baseline (Phylacine)	15.5695	5.40273	25.7362	348
Rodentia	Aeromys tephromelas	Baseline (IUCN)	8.08043	2.81699	13.3439	178
Rodentia	Aeromys tephromelas	Habitat loss (HL)	5.24406	1.82185	8.66627	178
Rodentia	Aeromys tephromelas	Overhunting (OH)	9.37059	0.574402	18.2082	178
Rodentia	Aeromys tephromelas	Habitat loss + Overhunting (COMB)	5.689	0.367783	11.0177	178
Rodentia	Aeromys thomasi	Baseline (Phylacine)	9.23372	3.13444	15.333	211
Rodentia	Aeromys thomasi	Baseline (IUCN)	8.62069	2.92539	14.316	197
Rodentia	Aeromys thomasi	Habitat loss (HL)	8.74985	2.97105	14.5286	197
Rodentia	Aeromys thomasi	Overhunting (OH)	11.0692	0.734009	21.4045	197
Rodentia	Aeromys thomasi	Habitat loss + Overhunting (COMB)	10.3276	0.686451	19.9687	197
Chiroptera	Aethalops aequalis	Baseline (Phylacine)	0.105426	0	0.264165	103
Chiroptera	Aethalops aequalis	Baseline (IUCN)	0.084865	0	0.21263	65
Chiroptera	Aethalops aequalis	Habitat loss (HL)	0.100252	0	0.251174	65
Chiroptera	Aethalops aequalis	Overhunting (OH)	0.32875	0	0.879645	65
Chiroptera	Aethalops aequalis	Habitat loss + Overhunting (COMB)	0.167577	0	0.44878	65
Chiroptera	Aethalops alecto	Baseline (Phylacine)	0.0596299	0	0.149421	150
Chiroptera	Aethalops alecto	Baseline (IUCN)	0.0645779	0	0.161798	133
Chiroptera	Aethalops alecto	Habitat loss (HL)	0.0580777	0	0.145477	133
Chiroptera	Aethalops alecto	Overhunting (OH)	0.871367	0	2.34574	133
Chiroptera	Aethalops alecto	Habitat loss + Overhunting (COMB)	0.123847	0	0.331475	133
Rodentia	Aethomys bocagei	Baseline (Phylacine)	8.77861	2.78578	14.7714	147
Rodentia	Aethomys bocagei	Baseline (IUCN)	6.9969	2.22134	11.7725	117
Rodentia	Aethomys bocagei	Habitat loss (HL)	6.27554	1.99115	10.5599	117
Rodentia	Aethomys bocagei	Overhunting (OH)	11.7328	0.226645	23.2403	117
Rodentia	Aethomys bocagei	Habitat loss + Overhunting (COMB)	10.18	0.199655	20.1612	117
Rodentia	Aethomys chrysophilus	Baseline (Phylacine)	39.2332	0	117.98	792
Rodentia	Aethomys chrysophilus	Baseline (IUCN)	37.1266	0	111.646	754
Rodentia	Aethomys chrysophilus	Habitat loss (HL)	39.0092	0	117.307	754
Rodentia	Aethomys chrysophilus	Overhunting (OH)	67.209	0	209.683	754
Rodentia	Aethomys chrysophilus	Habitat loss + Overhunting (COMB)	62.9171	0	196.293	754
Rodentia	Aethomys granti	Baseline (Phylacine)	0.0280355	0.0089316	0.0471395	1
Rodentia	Aethomys granti	Baseline (IUCN)	0.101558	0.0329828	0.170133	4
Rodentia	Aethomys granti	Habitat loss (HL)	0.0650349	0.0208203	0.10925	4
Rodentia	Aethomys granti	Overhunting (OH)	0.550857	0.0231754	1.07854	4
Rodentia	Aethomys granti	Habitat loss + Overhunting (COMB)	0.131004	0.00485392	0.257154	4
Rodentia	Aethomys hindei	Baseline (Phylacine)	42.6229	13.7916	71.4542	645
Rodentia	Aethomys hindei	Baseline (IUCN)	39.8491	12.898	66.8002	601
Rodentia	Aethomys hindei	Habitat loss (HL)	35.3497	11.4168	59.2826	601
Rodentia	Aethomys hindei	Overhunting (OH)	69.4609	3.74701	135.216	601
Rodentia	Aethomys hindei	Habitat loss + Overhunting (COMB)	61.5597	3.39368	119.751	601
Rodentia	Aethomys ineptus	Baseline (Phylacine)	4.46758	1.45319	7.48197	58
Rodentia	Aethomys ineptus	Baseline (IUCN)	4.52602	1.47137	7.58066	58
Rodentia	Aethomys ineptus	Habitat loss (HL)	1.6217	0.526454	2.71696	58
Rodentia	Aethomys ineptus	Overhunting (OH)	9.17566	0.431724	17.9207	58
Rodentia	Aethomys ineptus	Habitat loss + Overhunting (COMB)	2.68237	0.137157	5.2276	58
Rodentia	Aethomys kaiseri	Baseline (Phylacine)	42.7041	14.0142	71.394	655
Rodentia	Aethomys kaiseri	Baseline (IUCN)	40.2475	13.2136	67.2815	617
Rodentia	Aethomys kaiseri	Habitat loss (HL)	34.8474	11.4312	58.2636	617
Rodentia	Aethomys kaiseri	Overhunting (OH)	65.5261	4.063	126.996	617
Rodentia	Aethomys kaiseri	Habitat loss + Overhunting (COMB)	53.3119	3.37531	103.249	617
Rodentia	Aethomys namaquensis	Baseline (Phylacine)	14.7217	0	40.1468	208
Rodentia	Aethomys namaquensis	Baseline (IUCN)	13.7927	0	37.6126	192
Rodentia	Aethomys namaquensis	Habitat loss (HL)	14.3142	0	39.0397	192
Rodentia	Aethomys namaquensis	Overhunting (OH)	24.5164	0	70.1607	192
Rodentia	Aethomys namaquensis	Habitat loss + Overhunting (COMB)	24.3456	0	69.6731	192
Rodentia	Aethomys nyikae	Baseline (Phylacine)	24.3308	7.85392	40.8078	443
Rodentia	Aethomys nyikae	Baseline (IUCN)	21.0295	6.78366	35.2753	384
Rodentia	Aethomys nyikae	Habitat loss (HL)	9.24478	2.97411	15.5154	384
Rodentia	Aethomys nyikae	Overhunting (OH)	37.0853	1.6269	72.545	384
Rodentia	Aethomys nyikae	Habitat loss + Overhunting (COMB)	14.6752	0.673285	28.6772	384
Rodentia	Aethomys silindensis	Baseline (Phylacine)	1.19488	0.39003	1.99974	23
Rodentia	Aethomys silindensis	Baseline (IUCN)	0.509867	0.166506	0.853228	12
Rodentia	Aethomys silindensis	Habitat loss (HL)	0.218946	0.0714204	0.366471	12
Rodentia	Aethomys silindensis	Overhunting (OH)	1.36888	0.0392689	2.69849	12
Rodentia	Aethomys silindensis	Habitat loss + Overhunting (COMB)	0.33989	0.0103143	0.669466	12
Rodentia	Aethomys stannarius	Baseline (Phylacine)	0.108501	0.0348234	0.182178	3
Rodentia	Aethomys stannarius	Baseline (IUCN)	0.0127004	0.00406295	0.0213379	1
Rodentia	Aethomys stannarius	Habitat loss (HL)	0.0691044	0.022107	0.116102	1
Rodentia	Aethomys stannarius	Overhunting (OH)	0.14043	0.00260366	0.278256	1
Rodentia	Aethomys stannarius	Habitat loss + Overhunting (COMB)	0.136948	0.0025391	0.271357	1
Rodentia	Aethomys thomasi	Baseline (Phylacine)	1.13974	0.376135	1.90336	117
Rodentia	Aethomys thomasi	Baseline (IUCN)	1.13856	0.375747	1.90136	96
Rodentia	Aethomys thomasi	Habitat loss (HL)	1.46069	0.481931	2.43944	96
Rodentia	Aethomys thomasi	Overhunting (OH)	11.1374	0.311061	21.9645	96
Rodentia	Aethomys thomasi	Habitat loss + Overhunting (COMB)	2.21689	0.0694544	4.36432	96
Carnivora	Ailuropoda melanoleuca	Baseline (Phylacine)	42.3229	15.9202	68.7255	648
Carnivora	Ailuropoda melanoleuca	Baseline (IUCN)	7.10289	2.64784	11.5579	53
Carnivora	Ailuropoda melanoleuca	Habitat loss (HL)	4.44734	1.64792	7.24675	53
Carnivora	Ailuropoda melanoleuca	Overhunting (OH)	7.00347	0.325175	13.9243	53
Carnivora	Ailuropoda melanoleuca	Habitat loss + Overhunting (COMB)	2.98004	0.137166	5.83061	53
Diprotodontia	Ailurops ursinus	Baseline (Phylacine)	2.52813	0.919998	4.13626	70
Diprotodontia	Ailurops ursinus	Baseline (IUCN)	2.52813	0.919998	4.13626	70
Diprotodontia	Ailurops ursinus	Habitat loss (HL)	2.63677	0.962858	4.31069	70
Diprotodontia	Ailurops ursinus	Overhunting (OH)	4.45779	0.314068	8.60651	70
Diprotodontia	Ailurops ursinus	Habitat loss + Overhunting (COMB)	2.13875	0.149103	4.13248	70
Carnivora	Ailurus fulgens	Baseline (Phylacine)	5.269	1.82906	8.70893	328
Carnivora	Ailurus fulgens	Baseline (IUCN)	4.15317	1.44212	6.86422	193
Carnivora	Ailurus fulgens	Habitat loss (HL)	3.75695	1.30953	6.20436	193
Carnivora	Ailurus fulgens	Overhunting (OH)	13.139	0.747858	25.5901	193
Carnivora	Ailurus fulgens	Habitat loss + Overhunting (COMB)	4.38514	0.260133	8.5146	193
Rodentia	Akodon aerosus	Baseline (Phylacine)	0.581461	0.20656	0.956362	143
Rodentia	Akodon aerosus	Baseline (IUCN)	0.556054	0.197514	0.914595	103
Rodentia	Akodon aerosus	Habitat loss (HL)	0.617574	0.219076	1.01607	103
Rodentia	Akodon aerosus	Overhunting (OH)	1.931	0.211009	3.65099	103
Rodentia	Akodon aerosus	Habitat loss + Overhunting (COMB)	0.764958	0.0843093	1.44561	103
Rodentia	Akodon affinis	Baseline (Phylacine)	0.63551	0	1.39524	51
Rodentia	Akodon affinis	Baseline (IUCN)	0.642773	0	1.41122	42
Rodentia	Akodon affinis	Habitat loss (HL)	0.349279	0	0.766825	42
Rodentia	Akodon affinis	Overhunting (OH)	2.29233	0	5.4243	42
Rodentia	Akodon affinis	Habitat loss + Overhunting (COMB)	0.528687	0	1.24816	42
Rodentia	Akodon albiventer	Baseline (Phylacine)	9.86927e-05	3.22737e-05	0.000165112	25
Rodentia	Akodon albiventer	Baseline (IUCN)	9.15128e-05	2.993e-05	0.000153096	7
Rodentia	Akodon albiventer	Habitat loss (HL)	0.0027952	0.000890249	0.00470014	7
Rodentia	Akodon albiventer	Overhunting (OH)	0.156716	0.00997645	0.303456	7
Rodentia	Akodon albiventer	Habitat loss + Overhunting (COMB)	0.00505877	0.000242473	0.00987506	7
Rodentia	Akodon aliquantulus	Baseline (Phylacine)	0	0	0	0
Rodentia	Akodon aliquantulus	Baseline (IUCN)	0.000711553	0.000224895	0.00119821	60
Rodentia	Akodon aliquantulus	Habitat loss (HL)	0.0219573	0.00686099	0.0370535	60
Rodentia	Akodon aliquantulus	Overhunting (OH)	1.29326	0.0782603	2.50825	60
Rodentia	Akodon aliquantulus	Habitat loss + Overhunting (COMB)	0.0461326	0.00223698	0.0900282	60
Rodentia	Akodon azarae	Baseline (Phylacine)	1.56442	0.398037	2.7308	143
Rodentia	Akodon azarae	Baseline (IUCN)	1.24178	0.315237	2.16832	116
Rodentia	Akodon azarae	Habitat loss (HL)	0.253982	0.0630405	0.444923	116
Rodentia	Akodon azarae	Overhunting (OH)	2.78314	0.00635659	5.59048	116
Rodentia	Akodon azarae	Habitat loss + Overhunting (COMB)	0.478701	0.0011884	0.961944	116
Rodentia	Akodon boliviensis	Baseline (Phylacine)	0.0215404	0.00703031	0.0360504	43
Rodentia	Akodon boliviensis	Baseline (IUCN)	0.0207745	0.00678524	0.0347637	22
Rodentia	Akodon boliviensis	Habitat loss (HL)	0	0	0	22
Rodentia	Akodon boliviensis	Overhunting (OH)	0.392006	0.0321626	0.75185	22
Rodentia	Akodon boliviensis	Habitat loss + Overhunting (COMB)	0	0	0	22
Rodentia	Akodon budini	Baseline (Phylacine)	0.0588539	0.0187004	0.0990073	19
Rodentia	Akodon budini	Baseline (IUCN)	0.0461425	0.0147115	0.0775734	15
Rodentia	Akodon budini	Habitat loss (HL)	0.0663616	0.0211228	0.1116	15
Rodentia	Akodon budini	Overhunting (OH)	0.283736	0.014616	0.552856	15
Rodentia	Akodon budini	Habitat loss + Overhunting (COMB)	0.109764	0.00572224	0.213806	15
Rodentia	Akodon cursor	Baseline (Phylacine)	2.09634	0.720326	3.47236	353
Rodentia	Akodon cursor	Baseline (IUCN)	1.97135	0.676145	3.26656	314
Rodentia	Akodon cursor	Habitat loss (HL)	0.71927	0.245374	1.19317	314
Rodentia	Akodon cursor	Overhunting (OH)	7.01311	0.540792	13.4859	314
Rodentia	Akodon cursor	Habitat loss + Overhunting (COMB)	1.17599	0.0878031	2.26419	314
Rodentia	Akodon dayi	Baseline (Phylacine)	0.00703248	0.00243092	0.011634	156
Rodentia	Akodon dayi	Baseline (IUCN)	0.00703248	0.00243092	0.011634	130
Rodentia	Akodon dayi	Habitat loss (HL)	0.133963	0.0453079	0.222619	130
Rodentia	Akodon dayi	Overhunting (OH)	1.97894	0.177115	3.78076	130
Rodentia	Akodon dayi	Habitat loss + Overhunting (COMB)	0.207381	0.0200894	0.394673	130
Rodentia	Akodon dolores	Baseline (Phylacine)	0.0849726	0.0265028	0.143442	12
Rodentia	Akodon dolores	Baseline (IUCN)	0.0792088	0.0248746	0.133543	23
Rodentia	Akodon dolores	Habitat loss (HL)	0.0322131	0.0101501	0.054276	23
Rodentia	Akodon dolores	Overhunting (OH)	0.667588	0.037602	1.29757	23
Rodentia	Akodon dolores	Habitat loss + Overhunting (COMB)	0.0611764	0.00298736	0.119365	23
Rodentia	Akodon fumeus	Baseline (Phylacine)	0.387581	0.125249	0.649914	80
Rodentia	Akodon fumeus	Baseline (IUCN)	0.375976	0.121647	0.630305	64
Rodentia	Akodon fumeus	Habitat loss (HL)	0.379208	0.122694	0.635721	64
Rodentia	Akodon fumeus	Overhunting (OH)	1.00855	0.0793226	1.93777	64
Rodentia	Akodon fumeus	Habitat loss + Overhunting (COMB)	0.527723	0.0428027	1.01264	64
Rodentia	Akodon juninensis	Baseline (Phylacine)	0.000671301	0.000231709	0.00111089	30
Rodentia	Akodon juninensis	Baseline (IUCN)	0.000668573	0.000230767	0.00110638	16
Rodentia	Akodon juninensis	Habitat loss (HL)	0.0487755	0.0168492	0.0807017	16
Rodentia	Akodon juninensis	Overhunting (OH)	0.325829	0.0341914	0.617467	16
Rodentia	Akodon juninensis	Habitat loss + Overhunting (COMB)	0.0716637	0.00709622	0.136231	16
Rodentia	Akodon kofordi	Baseline (Phylacine)	0.0629621	0.0205782	0.105346	16
Rodentia	Akodon kofordi	Baseline (IUCN)	0.0536448	0.0175327	0.089757	15
Rodentia	Akodon kofordi	Habitat loss (HL)	0.0806501	0.0263499	0.13495	15
Rodentia	Akodon kofordi	Overhunting (OH)	0.24483	0.0220735	0.467587	15
Rodentia	Akodon kofordi	Habitat loss + Overhunting (COMB)	0.105443	0.00951439	0.201371	15
Rodentia	Akodon leucolimnaeus	Baseline (Phylacine)	0	0	0	0
Rodentia	Akodon leucolimnaeus	Baseline (IUCN)	0.108118	0.0342468	0.181989	20
Rodentia	Akodon leucolimnaeus	Habitat loss (HL)	0.195941	0.0616518	0.33023	20
Rodentia	Akodon leucolimnaeus	Overhunting (OH)	0.50903	0.0239656	0.994094	20
Rodentia	Akodon leucolimnaeus	Habitat loss + Overhunting (COMB)	0.372855	0.0177384	0.727971	20
Rodentia	Akodon lindberghi	Baseline (Phylacine)	0	0	0	109
Rodentia	Akodon lindberghi	Baseline (IUCN)	0	0	0	96
Rodentia	Akodon lindberghi	Habitat loss (HL)	0.0967798	0	0.210919	96
Rodentia	Akodon lindberghi	Overhunting (OH)	5.89613	0	13.8946	96
Rodentia	Akodon lindberghi	Habitat loss + Overhunting (COMB)	0.183389	0	0.429715	96
Rodentia	Akodon lutescens	Baseline (Phylacine)	0.191418	0.0544784	0.328358	29
Rodentia	Akodon lutescens	Baseline (IUCN)	0.126338	0.0359978	0.216679	16
Rodentia	Akodon lutescens	Habitat loss (HL)	0.15746	0.0448816	0.270038	16
Rodentia	Akodon lutescens	Overhunting (OH)	0.267062	0.013824	0.5203	16
Rodentia	Akodon lutescens	Habitat loss + Overhunting (COMB)	0.234076	0.0121835	0.455968	16
Rodentia	Akodon mimus	Baseline (Phylacine)	0.188135	0	0.414974	29
Rodentia	Akodon mimus	Baseline (IUCN)	0.178024	0	0.392688	18
Rodentia	Akodon mimus	Habitat loss (HL)	0.379943	0	0.838149	18
Rodentia	Akodon mimus	Overhunting (OH)	0.878216	0	2.06928	18
Rodentia	Akodon mimus	Habitat loss + Overhunting (COMB)	0.552263	0	1.30123	18
Rodentia	Akodon mollis	Baseline (Phylacine)	0.289993	0.0956388	0.484347	120
Rodentia	Akodon mollis	Baseline (IUCN)	0.282094	0.0930611	0.471126	97
Rodentia	Akodon mollis	Habitat loss (HL)	0.40837	0.134873	0.681867	97
Rodentia	Akodon mollis	Overhunting (OH)	2.02812	0.163828	3.89241	97
Rodentia	Akodon mollis	Habitat loss + Overhunting (COMB)	0.625537	0.0468711	1.2042	97
Rodentia	Akodon montensis	Baseline (Phylacine)	18.2995	0	45.0501	465
Rodentia	Akodon montensis	Baseline (IUCN)	17.7926	0	43.7994	429
Rodentia	Akodon montensis	Habitat loss (HL)	8.08163	0	19.895	429
Rodentia	Akodon montensis	Overhunting (OH)	135.207	0	352.03	429
Rodentia	Akodon montensis	Habitat loss + Overhunting (COMB)	12.8568	0	33.4528	429
Rodentia	Akodon mystax	Baseline (Phylacine)	0	0	0	10
Rodentia	Akodon mystax	Baseline (IUCN)	0	0	0	14
Rodentia	Akodon mystax	Habitat loss (HL)	0	0	0	14
Rodentia	Akodon mystax	Overhunting (OH)	0.831692	0	1.94347	14
Rodentia	Akodon mystax	Habitat loss + Overhunting (COMB)	0	0	0	14
Rodentia	Akodon neocenus	Baseline (Phylacine)	0	0	0	0
Rodentia	Akodon neocenus	Baseline (IUCN)	0.0792088	0.0248746	0.133543	23
Rodentia	Akodon neocenus	Habitat loss (HL)	0.0322131	0.0101501	0.054276	23
Rodentia	Akodon neocenus	Overhunting (OH)	0.667588	0.037602	1.29757	23
Rodentia	Akodon neocenus	Habitat loss + Overhunting (COMB)	0.0611764	0.00298736	0.119365	23
Rodentia	Akodon oenos	Baseline (Phylacine)	0	0	0	0
Rodentia	Akodon oenos	Baseline (IUCN)	0.108118	0.0342468	0.181989	20
Rodentia	Akodon oenos	Habitat loss (HL)	0.195941	0.0616518	0.33023	20
Rodentia	Akodon oenos	Overhunting (OH)	0.50903	0.0239656	0.994094	20
Rodentia	Akodon oenos	Habitat loss + Overhunting (COMB)	0.372855	0.0177384	0.727971	20
Rodentia	Akodon orophilus	Baseline (Phylacine)	0.179515	0.0589141	0.300117	42
Rodentia	Akodon orophilus	Baseline (IUCN)	0.144318	0.047298	0.241338	28
Rodentia	Akodon orophilus	Habitat loss (HL)	0.184801	0.0604998	0.309102	28
Rodentia	Akodon orophilus	Overhunting (OH)	0.497379	0.0431483	0.95161	28
Rodentia	Akodon orophilus	Habitat loss + Overhunting (COMB)	0.231542	0.0195392	0.443545	28
Rodentia	Akodon paranaensis	Baseline (Phylacine)	1.48461	0.431694	2.53752	134
Rodentia	Akodon paranaensis	Baseline (IUCN)	2.23248	0.664209	3.80076	195
Rodentia	Akodon paranaensis	Habitat loss (HL)	0.819657	0.244634	1.39468	195
Rodentia	Akodon paranaensis	Overhunting (OH)	4.50503	0.159136	8.85288	195
Rodentia	Akodon paranaensis	Habitat loss + Overhunting (COMB)	1.30939	0.0474928	2.5717	195
Rodentia	Akodon pervalens	Baseline (Phylacine)	0.136772	0.0472175	0.226327	25
Rodentia	Akodon pervalens	Baseline (IUCN)	0.151792	0.0524119	0.251172	27
Rodentia	Akodon pervalens	Habitat loss (HL)	0.168449	0.057875	0.279024	27
Rodentia	Akodon pervalens	Overhunting (OH)	0.547504	0.0487189	1.04629	27
Rodentia	Akodon pervalens	Habitat loss + Overhunting (COMB)	0.254857	0.0236182	0.486095	27
Rodentia	Akodon philipmyersi	Baseline (Phylacine)	0	0	0	4
Rodentia	Akodon philipmyersi	Baseline (IUCN)	4.86794e-06	1.33343e-06	8.40246e-06	8
Rodentia	Akodon philipmyersi	Habitat loss (HL)	0.00288372	0.000778185	0.00498925	8
Rodentia	Akodon philipmyersi	Overhunting (OH)	0.225771	0.00209369	0.450255	8
Rodentia	Akodon philipmyersi	Habitat loss + Overhunting (COMB)	0.00527621	6.61255e-05	0.0104863	8
Rodentia	Akodon reigi	Baseline (Phylacine)	0.12165	0.0324991	0.210801	10
Rodentia	Akodon reigi	Baseline (IUCN)	0.0725135	0.0188527	0.126174	7
Rodentia	Akodon reigi	Habitat loss (HL)	0.012623	0.00305265	0.0221933	7
Rodentia	Akodon reigi	Overhunting (OH)	0.221433	0.00407662	0.443229	7
Rodentia	Akodon reigi	Habitat loss + Overhunting (COMB)	0.0202506	0.000122213	0.0414975	7
Rodentia	Akodon sanctipaulensis	Baseline (Phylacine)	0.0601697	0.0183286	0.102011	6
Rodentia	Akodon sanctipaulensis	Baseline (IUCN)	0.17821	0.0550172	0.301404	17
Rodentia	Akodon sanctipaulensis	Habitat loss (HL)	0.121742	0.0374545	0.20603	17
Rodentia	Akodon sanctipaulensis	Overhunting (OH)	0.278329	0.0128221	0.543968	17
Rodentia	Akodon sanctipaulensis	Habitat loss + Overhunting (COMB)	0.186764	0.00977209	0.363763	17
Rodentia	Akodon serrensis	Baseline (Phylacine)	5.94847	0	12.91	180
Rodentia	Akodon serrensis	Baseline (IUCN)	4.95328	0	10.7515	149
Rodentia	Akodon serrensis	Habitat loss (HL)	1.82038	0	3.95206	149
Rodentia	Akodon serrensis	Overhunting (OH)	8.15063	0	19.1187	149
Rodentia	Akodon serrensis	Habitat loss + Overhunting (COMB)	2.91081	0	6.8207	149
Rodentia	Akodon siberiae	Baseline (Phylacine)	0.0233482	0.00750468	0.0391917	15
Rodentia	Akodon siberiae	Baseline (IUCN)	0.0188366	0.00606602	0.0316071	12
Rodentia	Akodon siberiae	Habitat loss (HL)	0.0234718	0.00756311	0.0393805	12
Rodentia	Akodon siberiae	Overhunting (OH)	0.171568	0.0129509	0.330185	12
Rodentia	Akodon siberiae	Habitat loss + Overhunting (COMB)	0.0325442	0.00259002	0.0624983	12
Rodentia	Akodon simulator	Baseline (Phylacine)	0.335738	0.112362	0.559114	74
Rodentia	Akodon simulator	Baseline (IUCN)	0.332708	0.111329	0.554086	58
Rodentia	Akodon simulator	Habitat loss (HL)	0.346684	0.115565	0.577802	58
Rodentia	Akodon simulator	Overhunting (OH)	1.31382	0.0899364	2.5377	58
Rodentia	Akodon simulator	Habitat loss + Overhunting (COMB)	0.596826	0.0412542	1.1524	58
Rodentia	Akodon spegazzinii	Baseline (Phylacine)	0	0	0	24
Rodentia	Akodon spegazzinii	Baseline (IUCN)	0	0	0	20
Rodentia	Akodon spegazzinii	Habitat loss (HL)	0.000191539	6.032e-05	0.000322758	20
Rodentia	Akodon spegazzinii	Overhunting (OH)	0.458901	0.0206619	0.89714	20
Rodentia	Akodon spegazzinii	Habitat loss + Overhunting (COMB)	0.0003353	2.01252e-05	0.000650475	20
Rodentia	Akodon subfuscus	Baseline (Phylacine)	0.123133	0.0400649	0.206202	53
Rodentia	Akodon subfuscus	Baseline (IUCN)	0.107146	0.0349123	0.17938	34
Rodentia	Akodon subfuscus	Habitat loss (HL)	0.183211	0.0597307	0.306692	34
Rodentia	Akodon subfuscus	Overhunting (OH)	0.594696	0.0486988	1.14069	34
Rodentia	Akodon subfuscus	Habitat loss + Overhunting (COMB)	0.242794	0.0211661	0.464422	34
Rodentia	Akodon surdus	Baseline (Phylacine)	0.0717385	0.0247293	0.118748	15
Rodentia	Akodon surdus	Baseline (IUCN)	0.0548152	0.0189494	0.0906809	11
Rodentia	Akodon surdus	Habitat loss (HL)	0.0932707	0.0322602	0.154281	11
Rodentia	Akodon surdus	Overhunting (OH)	0.208907	0.0216192	0.396194	11
Rodentia	Akodon surdus	Habitat loss + Overhunting (COMB)	0.112094	0.0120469	0.212142	11
Rodentia	Akodon sylvanus	Baseline (Phylacine)	0.138782	0.0473473	0.230216	35
Rodentia	Akodon sylvanus	Baseline (IUCN)	0.125096	0.0426808	0.207511	22
Rodentia	Akodon sylvanus	Habitat loss (HL)	0.168726	0.0573237	0.280128	22
Rodentia	Akodon sylvanus	Overhunting (OH)	0.406483	0.0338983	0.779068	22
Rodentia	Akodon sylvanus	Habitat loss + Overhunting (COMB)	0.256979	0.0219566	0.492001	22
Rodentia	Akodon toba	Baseline (Phylacine)	0.068182	0.0230444	0.113319	236
Rodentia	Akodon toba	Baseline (IUCN)	0.0663577	0.02243	0.110285	207
Rodentia	Akodon toba	Habitat loss (HL)	0	0	0	207
Rodentia	Akodon toba	Overhunting (OH)	4.91389	0.313231	9.51456	207
Rodentia	Akodon toba	Habitat loss + Overhunting (COMB)	0	0	0	207
Rodentia	Akodon torques	Baseline (Phylacine)	0.12649	0.0412195	0.21176	52
Rodentia	Akodon torques	Baseline (IUCN)	0.115204	0.0375548	0.192854	36
Rodentia	Akodon torques	Habitat loss (HL)	0.155217	0.05063	0.259804	36
Rodentia	Akodon torques	Overhunting (OH)	0.615261	0.0545166	1.176	36
Rodentia	Akodon torques	Habitat loss + Overhunting (COMB)	0.204011	0.0184109	0.389611	36
Rodentia	Akodon varius	Baseline (Phylacine)	0.427603	0.145467	0.709739	95
Rodentia	Akodon varius	Baseline (IUCN)	0.385421	0.131327	0.639515	84
Rodentia	Akodon varius	Habitat loss (HL)	0.403248	0.137373	0.669123	84
Rodentia	Akodon varius	Overhunting (OH)	1.46893	0.133179	2.80468	84
Rodentia	Akodon varius	Habitat loss + Overhunting (COMB)	0.569871	0.0525997	1.08714	84
Cetartiodactyla	Alcelaphus buselaphus	Baseline (Phylacine)	224.325	85.7887	362.861	1570
Cetartiodactyla	Alcelaphus buselaphus	Baseline (IUCN)	196.92	75.3275	318.512	1387
Cetartiodactyla	Alcelaphus buselaphus	Habitat loss (HL)	177.379	67.8123	286.945	1375
Cetartiodactyla	Alcelaphus buselaphus	Overhunting (OH)	174.578	21.186	329.811	1375
Cetartiodactyla	Alcelaphus buselaphus	Habitat loss + Overhunting (COMB)	160.962	19.9505	303.314	1375
Chiroptera	Alionycteris paucidentata	Baseline (Phylacine)	0.000603698	0	0.00128533	11
Chiroptera	Alionycteris paucidentata	Baseline (IUCN)	0.000591442	0	0.00125928	7
Chiroptera	Alionycteris paucidentata	Habitat loss (HL)	0	0	0	7
Chiroptera	Alionycteris paucidentata	Overhunting (OH)	0.0153896	0	0.0363078	7
Chiroptera	Alionycteris paucidentata	Habitat loss + Overhunting (COMB)	0	0	0	7
Rodentia	Allactaga sibirica	Baseline (Phylacine)	0.027525	0.00841348	0.0466365	3
Rodentia	Allactaga sibirica	Baseline (IUCN)	0.00962965	0.00277658	0.0164827	1
Rodentia	Allactaga sibirica	Habitat loss (HL)	0.00725116	0.00209078	0.0124115	1
Rodentia	Allactaga sibirica	Overhunting (OH)	0.0235323	0.000268487	0.0467961	1
Rodentia	Allactaga sibirica	Habitat loss + Overhunting (COMB)	0.0103075	0.000117602	0.0204975	1
Primates	Allenopithecus nigroviridis	Baseline (Phylacine)	44.2011	7.04534	81.3568	285
Primates	Allenopithecus nigroviridis	Baseline (IUCN)	40.3119	6.4222	74.2015	261
Primates	Allenopithecus nigroviridis	Habitat loss (HL)	38.5119	6.13326	70.8905	261
Primates	Allenopithecus nigroviridis	Overhunting (OH)	41.0692	0	83.4792	261
Primates	Allenopithecus nigroviridis	Habitat loss + Overhunting (COMB)	38.4382	0	78.1269	261
Primates	Allocebus trichotis	Baseline (Phylacine)	0.266739	0	0.575892	54
Primates	Allocebus trichotis	Baseline (IUCN)	0.0988778	0	0.213492	18
Primates	Allocebus trichotis	Habitat loss (HL)	0.0751717	0	0.162297	18
Primates	Allocebus trichotis	Overhunting (OH)	0.116981	0	0.272306	18
Primates	Allocebus trichotis	Habitat loss + Overhunting (COMB)	0.074525	0	0.173531	18
Primates	Allochrocebus lhoesti	Baseline (Phylacine)	16.7623	0	48.0994	163
Primates	Allochrocebus lhoesti	Baseline (IUCN)	12.7709	0	36.6408	124
Primates	Allochrocebus lhoesti	Habitat loss (HL)	10.5806	0	30.3504	124
Primates	Allochrocebus lhoesti	Overhunting (OH)	11.9066	0	35.3419	124
Primates	Allochrocebus lhoesti	Habitat loss + Overhunting (COMB)	10.0299	0	29.716	124
Primates	Allochrocebus preussi	Baseline (Phylacine)	7.31641	1.25225	13.3806	38
Primates	Allochrocebus preussi	Baseline (IUCN)	4.66845	0.795464	8.54144	21
Primates	Allochrocebus preussi	Habitat loss (HL)	2.87825	0.486991	5.26951	21
Primates	Allochrocebus preussi	Overhunting (OH)	3.05859	0	6.55935	21
Primates	Allochrocebus preussi	Habitat loss + Overhunting (COMB)	1.72236	0	3.61	21
Primates	Allochrocebus solatus	Baseline (Phylacine)	9.22187	0	33.7986	16
Primates	Allochrocebus solatus	Baseline (IUCN)	10.3355	0	37.877	18
Primates	Allochrocebus solatus	Habitat loss (HL)	9.85099	0	36.1015	18
Primates	Allochrocebus solatus	Overhunting (OH)	9.7992	0	36.527	18
Primates	Allochrocebus solatus	Habitat loss + Overhunting (COMB)	9.30561	0	34.6873	18
Primates	Alouatta arctoidea	Baseline (Phylacine)	78.7699	17.5733	139.966	214
Primates	Alouatta arctoidea	Baseline (IUCN)	67.1684	14.9396	119.397	180
Primates	Alouatta arctoidea	Habitat loss (HL)	61.3376	13.612	109.063	180
Primates	Alouatta arctoidea	Overhunting (OH)	52.9171	0.0249603	109.597	180
Primates	Alouatta arctoidea	Habitat loss + Overhunting (COMB)	40.4579	0.0168756	83.8679	180
Primates	Alouatta belzebul	Baseline (Phylacine)	100.688	0	229.745	396
Primates	Alouatta belzebul	Baseline (IUCN)	92.5576	0	211.194	366
Primates	Alouatta belzebul	Habitat loss (HL)	60.6896	0	138.487	366
Primates	Alouatta belzebul	Overhunting (OH)	98.5742	0	233.292	366
Primates	Alouatta belzebul	Habitat loss + Overhunting (COMB)	56.5642	0	133.808	366
Primates	Alouatta caraya	Baseline (Phylacine)	965.623	0	2262.5	1412
Primates	Alouatta caraya	Baseline (IUCN)	903.009	0	2115.84	1311
Primates	Alouatta caraya	Habitat loss (HL)	738.792	0	1731.4	1311
Primates	Alouatta caraya	Overhunting (OH)	919.418	0	2273.3	1311
Primates	Alouatta caraya	Habitat loss + Overhunting (COMB)	726.67	0	1796.08	1311
Primates	Alouatta discolor	Baseline (Phylacine)	66.0007	15.5392	116.462	241
Primates	Alouatta discolor	Baseline (IUCN)	52.1929	12.2776	92.1081	193
Primates	Alouatta discolor	Habitat loss (HL)	45.8137	10.7692	80.8581	193
Primates	Alouatta discolor	Overhunting (OH)	97.2487	12.3818	182.116	193
Primates	Alouatta discolor	Habitat loss + Overhunting (COMB)	83.6973	10.6698	156.725	193
Primates	Alouatta guariba	Baseline (Phylacine)	276.198	0	586.616	464
Primates	Alouatta guariba	Baseline (IUCN)	240.125	0	509.926	381
Primates	Alouatta guariba	Habitat loss (HL)	73.4517	0	155.994	381
Primates	Alouatta guariba	Overhunting (OH)	256.94	0	571.257	381
Primates	Alouatta guariba	Habitat loss + Overhunting (COMB)	69.7577	0	155.191	381
Primates	Alouatta macconnelli	Baseline (Phylacine)	148.061	0	416.995	776
Primates	Alouatta macconnelli	Baseline (IUCN)	143.748	0	404.845	754
Primates	Alouatta macconnelli	Habitat loss (HL)	134.176	0	377.871	754
Primates	Alouatta macconnelli	Overhunting (OH)	119.848	0	341.8	754
Primates	Alouatta macconnelli	Habitat loss + Overhunting (COMB)	106.407	0	303.438	754
Primates	Alouatta nigerrima	Baseline (Phylacine)	43.3835	10.3078	76.4592	153
Primates	Alouatta nigerrima	Baseline (IUCN)	36.6947	8.7183	64.6711	129
Primates	Alouatta nigerrima	Habitat loss (HL)	36.0324	8.55829	63.5064	129
Primates	Alouatta nigerrima	Overhunting (OH)	44.2545	1.75666	86.7554	129
Primates	Alouatta nigerrima	Habitat loss + Overhunting (COMB)	40.5093	1.62674	79.3939	129
Primates	Alouatta palliata	Baseline (Phylacine)	714.504	0	1630.75	299
Primates	Alouatta palliata	Baseline (IUCN)	659.866	0	1506.06	272
Primates	Alouatta palliata	Habitat loss (HL)	353.763	0	808.162	272
Primates	Alouatta palliata	Overhunting (OH)	631.957	0	1474.99	272
Primates	Alouatta palliata	Habitat loss + Overhunting (COMB)	273.572	0	637.886	272
Primates	Alouatta pigra	Baseline (Phylacine)	286.203	0	594.073	125
Primates	Alouatta pigra	Baseline (IUCN)	263.554	0	547.044	116
Primates	Alouatta pigra	Habitat loss (HL)	163.205	0	338.722	116
Primates	Alouatta pigra	Overhunting (OH)	201.169	0	457.711	116
Primates	Alouatta pigra	Habitat loss + Overhunting (COMB)	122.524	0	275.738	116
Primates	Alouatta sara	Baseline (Phylacine)	150.192	0	422.983	207
Primates	Alouatta sara	Baseline (IUCN)	127.316	0	358.517	173
Primates	Alouatta sara	Habitat loss (HL)	95.6965	0	269.467	173
Primates	Alouatta sara	Overhunting (OH)	85.0401	0	246.122	173
Primates	Alouatta sara	Habitat loss + Overhunting (COMB)	58.8542	0	170.271	173
Primates	Alouatta ululata	Baseline (Phylacine)	20.927	4.73567	37.1183	58
Primates	Alouatta ululata	Baseline (IUCN)	15.0933	3.40846	26.7782	42
Primates	Alouatta ululata	Habitat loss (HL)	14.2481	3.21392	25.2823	42
Primates	Alouatta ululata	Overhunting (OH)	13.1961	0.251174	26.1793	42
Primates	Alouatta ululata	Habitat loss + Overhunting (COMB)	11.9233	0.232274	23.6506	42
Rodentia	Alticola argentatus	Baseline (Phylacine)	0.0408294	0.0100948	0.0715641	7
Rodentia	Alticola argentatus	Baseline (IUCN)	0.0492472	0.0121801	0.0863142	6
Rodentia	Alticola argentatus	Habitat loss (HL)	0.0945124	0.0234522	0.165573	6
Rodentia	Alticola argentatus	Overhunting (OH)	0.635399	0	1.29113	6
Rodentia	Alticola argentatus	Habitat loss + Overhunting (COMB)	0.168197	0	0.341615	6
Rodentia	Alticola montosa	Baseline (Phylacine)	0.114905	0.029058	0.200751	5
Rodentia	Alticola montosa	Baseline (IUCN)	0.0990607	0.0250251	0.173096	4
Rodentia	Alticola montosa	Habitat loss (HL)	0.0503772	0.0128541	0.0879002	4
Rodentia	Alticola montosa	Overhunting (OH)	0.456643	0.000178041	0.918152	4
Rodentia	Alticola montosa	Habitat loss + Overhunting (COMB)	0.074667	0.000120656	0.149213	4
Rodentia	Alticola roylei	Baseline (Phylacine)	0.154801	0.0405987	0.269004	29
Rodentia	Alticola roylei	Baseline (IUCN)	0.115785	0.0304245	0.201145	13
Rodentia	Alticola roylei	Habitat loss (HL)	0.057973	0.0153433	0.100603	13
Rodentia	Alticola roylei	Overhunting (OH)	1.30284	0	2.63711	13
Rodentia	Alticola roylei	Habitat loss + Overhunting (COMB)	0.0978757	0	0.196389	13
Rodentia	Alticola stoliczkanus	Baseline (Phylacine)	0.150682	0.0360919	0.265271	62
Rodentia	Alticola stoliczkanus	Baseline (IUCN)	0.0913797	0.0219243	0.160835	32
Rodentia	Alticola stoliczkanus	Habitat loss (HL)	0.289056	0.0690784	0.509034	32
Rodentia	Alticola stoliczkanus	Overhunting (OH)	2.89464	0	5.94442	32
Rodentia	Alticola stoliczkanus	Habitat loss + Overhunting (COMB)	0.665667	0	1.37474	32
Afrosoricida	Amblysomus corriae	Baseline (Phylacine)	0.58793	0	2.52251	2
Afrosoricida	Amblysomus corriae	Baseline (IUCN)	0	0	0	0
Afrosoricida	Amblysomus corriae	Habitat loss (HL)	0	0	0	0
Afrosoricida	Amblysomus corriae	Overhunting (OH)	0	0	0	0
Afrosoricida	Amblysomus corriae	Habitat loss + Overhunting (COMB)	0	0	0	0
Afrosoricida	Amblysomus hottentotus	Baseline (Phylacine)	6.30422	0	23.8675	51
Afrosoricida	Amblysomus hottentotus	Baseline (IUCN)	6.18511	0	23.4168	50
Afrosoricida	Amblysomus hottentotus	Habitat loss (HL)	6.83007	0	25.8632	50
Afrosoricida	Amblysomus hottentotus	Overhunting (OH)	11.8026	0	45.7323	50
Afrosoricida	Amblysomus hottentotus	Habitat loss + Overhunting (COMB)	11.6511	0	45.1463	50
Afrosoricida	Amblysomus marleyi	Baseline (Phylacine)	1.21917	0	4.61246	10
Afrosoricida	Amblysomus marleyi	Baseline (IUCN)	0.611198	0	2.3123	5
Afrosoricida	Amblysomus marleyi	Habitat loss (HL)	0.549036	0	2.07713	5
Afrosoricida	Amblysomus marleyi	Overhunting (OH)	1.02062	0	3.94845	5
Afrosoricida	Amblysomus marleyi	Habitat loss + Overhunting (COMB)	0.89307	0	3.45528	5
Afrosoricida	Amblysomus robustus	Baseline (Phylacine)	0.364852	0	1.38017	6
Afrosoricida	Amblysomus robustus	Baseline (IUCN)	0.0783986	0	0.296549	1
Afrosoricida	Amblysomus robustus	Habitat loss (HL)	0.0939192	0	0.355256	1
Afrosoricida	Amblysomus robustus	Overhunting (OH)	0.226341	0	0.875025	1
Afrosoricida	Amblysomus robustus	Habitat loss + Overhunting (COMB)	0.173964	0	0.67254	1
Afrosoricida	Amblysomus septentrionalis	Baseline (Phylacine)	1.53986	0	5.82541	13
Afrosoricida	Amblysomus septentrionalis	Baseline (IUCN)	1.06136	0	4.01514	9
Afrosoricida	Amblysomus septentrionalis	Habitat loss (HL)	1.07099	0	4.05156	9
Afrosoricida	Amblysomus septentrionalis	Overhunting (OH)	1.78494	0	6.90849	9
Afrosoricida	Amblysomus septentrionalis	Habitat loss + Overhunting (COMB)	1.78494	0	6.90849	9
Chiroptera	Ametrida centurio	Baseline (Phylacine)	1.61166	0	3.48055	2448
Chiroptera	Ametrida centurio	Baseline (IUCN)	1.56816	0	3.38678	2377
Chiroptera	Ametrida centurio	Habitat loss (HL)	1.21176	0	2.6189	2377
Chiroptera	Ametrida centurio	Overhunting (OH)	3.54071	0	8.30224	2377
Chiroptera	Ametrida centurio	Habitat loss + Overhunting (COMB)	2.22796	0	5.22986	2377
Rodentia	Ammospermophilus interpres	Baseline (Phylacine)	0.0212223	0.00434068	0.0381039	2
Rodentia	Ammospermophilus interpres	Baseline (IUCN)	0.0212223	0.00434068	0.0381039	2
Rodentia	Ammospermophilus interpres	Habitat loss (HL)	0.0362872	0.00741593	0.0651584	2
Rodentia	Ammospermophilus interpres	Overhunting (OH)	0.125589	0	0.254937	2
Rodentia	Ammospermophilus interpres	Habitat loss + Overhunting (COMB)	0.0644333	0	0.13124	2
Rodentia	Ammospermophilus leucurus	Baseline (Phylacine)	0.0112541	0.00216448	0.0203437	1
Rodentia	Ammospermophilus leucurus	Baseline (IUCN)	0.0112541	0.00216448	0.0203437	1
Rodentia	Ammospermophilus leucurus	Habitat loss (HL)	0.0254466	0.0048941	0.045999	1
Rodentia	Ammospermophilus leucurus	Overhunting (OH)	0.0427326	0	0.0932464	1
Rodentia	Ammospermophilus leucurus	Habitat loss + Overhunting (COMB)	0.0427326	0	0.0932464	1
Chiroptera	Amorphochilus schnablii	Baseline (Phylacine)	0.000300092	0	0.000651521	26
Chiroptera	Amorphochilus schnablii	Baseline (IUCN)	0.000236837	0	0.000514319	18
Chiroptera	Amorphochilus schnablii	Habitat loss (HL)	0.000238801	0	0.000518714	18
Chiroptera	Amorphochilus schnablii	Overhunting (OH)	0.00117096	0	0.00276799	18
Chiroptera	Amorphochilus schnablii	Habitat loss + Overhunting (COMB)	0.000446376	0	0.0010518	18
Rodentia	Amphinectomys savamis	Baseline (Phylacine)	0	0	0	4
Rodentia	Amphinectomys savamis	Baseline (IUCN)	0	0	0	18
Rodentia	Amphinectomys savamis	Habitat loss (HL)	0	0	0	18
Rodentia	Amphinectomys savamis	Overhunting (OH)	0.504696	0.0463531	0.963038	18
Rodentia	Amphinectomys savamis	Habitat loss + Overhunting (COMB)	0	0	0	18
Scandentia	Anathana ellioti	Baseline (Phylacine)	2.19133	0.754104	3.62855	125
Scandentia	Anathana ellioti	Baseline (IUCN)	2.1523	0.740675	3.56392	123
Scandentia	Anathana ellioti	Habitat loss (HL)	1.86462	0.640732	3.0885	123
Scandentia	Anathana ellioti	Overhunting (OH)	3.8949	0.145838	7.65072	123
Scandentia	Anathana ellioti	Habitat loss + Overhunting (COMB)	2.76827	0.107111	5.43123	123
Rodentia	Andalgalomys olrogi	Baseline (Phylacine)	0.0770506	0	0.167508	7
Rodentia	Andalgalomys olrogi	Baseline (IUCN)	0.0183465	0	0.0399084	2
Rodentia	Andalgalomys olrogi	Habitat loss (HL)	0	0	0	2
Rodentia	Andalgalomys olrogi	Overhunting (OH)	0.268561	0	0.631453	2
Rodentia	Andalgalomys olrogi	Habitat loss + Overhunting (COMB)	0	0	0	2
Rodentia	Andalgalomys pearsoni	Baseline (Phylacine)	0	0	0	95
Rodentia	Andalgalomys pearsoni	Baseline (IUCN)	0	0	0	77
Rodentia	Andalgalomys pearsoni	Habitat loss (HL)	0	0	0	77
Rodentia	Andalgalomys pearsoni	Overhunting (OH)	6.59494	0	15.457	77
Rodentia	Andalgalomys pearsoni	Habitat loss + Overhunting (COMB)	0	0	0	77
Rodentia	Andinomys edax	Baseline (Phylacine)	0.288294	0.085182	0.491406	38
Rodentia	Andinomys edax	Baseline (IUCN)	0.199368	0.0589609	0.339774	20
Rodentia	Andinomys edax	Habitat loss (HL)	0.19838	0.0594673	0.337294	20
Rodentia	Andinomys edax	Overhunting (OH)	1.50181	0.077958	2.92567	20
Rodentia	Andinomys edax	Habitat loss + Overhunting (COMB)	0.305453	0.0165709	0.594335	20
Rodentia	Anisomys imitator	Baseline (Phylacine)	3.82351	0.917124	6.7299	148
Rodentia	Anisomys imitator	Baseline (IUCN)	3.8039	0.912595	6.69521	121
Rodentia	Anisomys imitator	Habitat loss (HL)	3.23172	0.773673	5.68976	121
Rodentia	Anisomys imitator	Overhunting (OH)	10.5631	0.0114412	21.3222	121
Rodentia	Anisomys imitator	Habitat loss + Overhunting (COMB)	3.93595	0.0055511	7.94197	121
Rodentia	Anomalurus beecrofti	Baseline (Phylacine)	37.2742	15.7476	58.8008	1426
Rodentia	Anomalurus beecrofti	Baseline (IUCN)	35.9762	15.1901	56.7623	1375
Rodentia	Anomalurus beecrofti	Habitat loss (HL)	28.5977	12.0442	45.1512	1375
Rodentia	Anomalurus beecrofti	Overhunting (OH)	50.5602	7.4019	93.7194	1375
Rodentia	Anomalurus beecrofti	Habitat loss + Overhunting (COMB)	36.8791	5.55102	68.2078	1375
Rodentia	Anomalurus derbianus	Baseline (Phylacine)	159.571	0	559.345	2318
Rodentia	Anomalurus derbianus	Baseline (IUCN)	156.449	0	548.401	2264
Rodentia	Anomalurus derbianus	Habitat loss (HL)	93.4573	0	327.687	2264
Rodentia	Anomalurus derbianus	Overhunting (OH)	250.707	0	895.95	2264
Rodentia	Anomalurus derbianus	Habitat loss + Overhunting (COMB)	134.918	0	481.935	2264
Rodentia	Anomalurus pelii	Baseline (Phylacine)	3.45945	1.44639	5.47251	121
Rodentia	Anomalurus pelii	Baseline (IUCN)	1.87362	0.783935	2.96331	67
Rodentia	Anomalurus pelii	Habitat loss (HL)	1.24442	0.520092	1.96876	67
Rodentia	Anomalurus pelii	Overhunting (OH)	2.15889	0.227496	4.09028	67
Rodentia	Anomalurus pelii	Habitat loss + Overhunting (COMB)	1.18977	0.129865	2.24967	67
Rodentia	Anomalurus pusillus	Baseline (Phylacine)	6.2335	0	21.8656	324
Rodentia	Anomalurus pusillus	Baseline (IUCN)	5.40025	0	18.9436	279
Rodentia	Anomalurus pusillus	Habitat loss (HL)	4.801	0	16.8442	279
Rodentia	Anomalurus pusillus	Overhunting (OH)	7.19627	0	25.785	279
Rodentia	Anomalurus pusillus	Habitat loss + Overhunting (COMB)	6.31691	0	22.6328	279
Rodentia	Anonymomys mindorensis	Baseline (Phylacine)	0.0800132	0.0259004	0.134126	3
Rodentia	Anonymomys mindorensis	Baseline (IUCN)	0.0435723	0.0140607	0.0730838	2
Rodentia	Anonymomys mindorensis	Habitat loss (HL)	0.0300958	0.00969566	0.0504959	2
Rodentia	Anonymomys mindorensis	Overhunting (OH)	0.104296	0.00295254	0.20564	2
Rodentia	Anonymomys mindorensis	Habitat loss + Overhunting (COMB)	0.0455492	0.00092976	0.0901687	2
Rodentia	Anotomys leander	Baseline (Phylacine)	0.0563329	0.0201564	0.0925094	20
Rodentia	Anotomys leander	Baseline (IUCN)	0.0346538	0.0124192	0.0568883	14
Rodentia	Anotomys leander	Habitat loss (HL)	0.110755	0.0396941	0.181817	14
Rodentia	Anotomys leander	Overhunting (OH)	0.551408	0.0499933	1.05282	14
Rodentia	Anotomys leander	Habitat loss + Overhunting (COMB)	0.153212	0.0145455	0.291879	14
Chiroptera	Anoura caudifer	Baseline (Phylacine)	0.184217	0	0.380666	2678
Chiroptera	Anoura caudifer	Baseline (IUCN)	0.177442	0	0.366697	2518
Chiroptera	Anoura caudifer	Habitat loss (HL)	0.0890723	0	0.18401	2518
Chiroptera	Anoura caudifer	Overhunting (OH)	1.92206	0	4.36274	2518
Chiroptera	Anoura caudifer	Habitat loss + Overhunting (COMB)	0.150557	0	0.34215	2518
Chiroptera	Anoura cultrata	Baseline (Phylacine)	0.233942	0	0.480235	508
Chiroptera	Anoura cultrata	Baseline (IUCN)	0.18685	0	0.383422	390
Chiroptera	Anoura cultrata	Habitat loss (HL)	0.130226	0	0.267203	390
Chiroptera	Anoura cultrata	Overhunting (OH)	0.350945	0	0.789972	390
Chiroptera	Anoura cultrata	Habitat loss + Overhunting (COMB)	0.186583	0	0.418948	390
Chiroptera	Anoura fistulata	Baseline (Phylacine)	0.00718343	0	0.0147645	48
Chiroptera	Anoura fistulata	Baseline (IUCN)	0.011029	0	0.0226762	68
Chiroptera	Anoura fistulata	Habitat loss (HL)	0.0105164	0	0.0216232	68
Chiroptera	Anoura fistulata	Overhunting (OH)	0.0604125	0	0.136091	68
Chiroptera	Anoura fistulata	Habitat loss + Overhunting (COMB)	0.0173211	0	0.0389203	68
Chiroptera	Anoura geoffroyi	Baseline (Phylacine)	0.490914	0	1.00987	3110
Chiroptera	Anoura geoffroyi	Baseline (IUCN)	0.481731	0	0.99093	2970
Chiroptera	Anoura geoffroyi	Habitat loss (HL)	0.478993	0	0.985474	2970
Chiroptera	Anoura geoffroyi	Overhunting (OH)	2.85737	0	6.44688	2970
Chiroptera	Anoura geoffroyi	Habitat loss + Overhunting (COMB)	0.792754	0	1.79144	2970
Chiroptera	Anoura latidens	Baseline (Phylacine)	0.203414	0	0.418066	494
Chiroptera	Anoura latidens	Baseline (IUCN)	0.1601	0	0.329026	387
Chiroptera	Anoura latidens	Habitat loss (HL)	0.130348	0	0.267953	387
Chiroptera	Anoura latidens	Overhunting (OH)	0.323354	0	0.730108	387
Chiroptera	Anoura latidens	Habitat loss + Overhunting (COMB)	0.19311	0	0.436246	387
Chiroptera	Anoura luismanueli	Baseline (Phylacine)	0.00958737	0	0.0197449	94
Chiroptera	Anoura luismanueli	Baseline (IUCN)	0.0090327	0	0.0186009	60
Chiroptera	Anoura luismanueli	Habitat loss (HL)	0.00415581	0	0.0085575	60
Chiroptera	Anoura luismanueli	Overhunting (OH)	0.0520689	0	0.118327	60
Chiroptera	Anoura luismanueli	Habitat loss + Overhunting (COMB)	0.00722093	0	0.016349	60
Eulipotyphla	Anourosorex assamensis	Baseline (Phylacine)	0.0123492	0.00252974	0.0221686	29
Eulipotyphla	Anourosorex assamensis	Baseline (IUCN)	0.0141515	0.00290927	0.0253937	20
Eulipotyphla	Anourosorex assamensis	Habitat loss (HL)	0.021241	0.00435732	0.0381248	20
Eulipotyphla	Anourosorex assamensis	Overhunting (OH)	0.177342	0	0.367434	20
Eulipotyphla	Anourosorex assamensis	Habitat loss + Overhunting (COMB)	0.0378294	0	0.0780829	20
Eulipotyphla	Anourosorex schmidi	Baseline (Phylacine)	0.0414561	0.00886932	0.0740429	20
Eulipotyphla	Anourosorex schmidi	Baseline (IUCN)	0.026865	0.00578955	0.0479404	9
Eulipotyphla	Anourosorex schmidi	Habitat loss (HL)	0.0263822	0.00569863	0.0470657	9
Eulipotyphla	Anourosorex schmidi	Overhunting (OH)	0.0961174	0	0.199649	9
Eulipotyphla	Anourosorex schmidi	Habitat loss + Overhunting (COMB)	0.0434707	0	0.0901663	9
Eulipotyphla	Anourosorex squamipes	Baseline (Phylacine)	2.91114	0.592727	5.22954	587
Eulipotyphla	Anourosorex squamipes	Baseline (IUCN)	2.73792	0.557027	4.91882	538
Eulipotyphla	Anourosorex squamipes	Habitat loss (HL)	1.48805	0.299661	2.67645	538
Eulipotyphla	Anourosorex squamipes	Overhunting (OH)	5.59353	0	11.6863	538
Eulipotyphla	Anourosorex squamipes	Habitat loss + Overhunting (COMB)	2.5108	0	5.23727	538
Eulipotyphla	Anourosorex yamashinai	Baseline (Phylacine)	0.0388403	0.00777589	0.0699047	9
Eulipotyphla	Anourosorex yamashinai	Baseline (IUCN)	0.0388403	0.00777589	0.0699047	9
Eulipotyphla	Anourosorex yamashinai	Habitat loss (HL)	0.0467645	0.00936045	0.0841686	9
Eulipotyphla	Anourosorex yamashinai	Overhunting (OH)	0.0883813	0	0.18721	9
Eulipotyphla	Anourosorex yamashinai	Habitat loss + Overhunting (COMB)	0.0657206	0	0.138881	9
Chiroptera	Anthops ornatus	Baseline (Phylacine)	0.000280885	0	0.000588193	4
Chiroptera	Anthops ornatus	Baseline (IUCN)	0.000280885	0	0.000588193	4
Chiroptera	Anthops ornatus	Habitat loss (HL)	0.000674095	0	0.00141163	4
Chiroptera	Anthops ornatus	Overhunting (OH)	0.00117856	0	0.00273457	4
Chiroptera	Anthops ornatus	Habitat loss + Overhunting (COMB)	0.00102202	0	0.00237076	4
Cetartiodactyla	Antidorcas marsupialis	Baseline (Phylacine)	1.53216	0.243043	2.82127	15
Cetartiodactyla	Antidorcas marsupialis	Baseline (IUCN)	1.25251	0.1982	2.30682	10
Cetartiodactyla	Antidorcas marsupialis	Habitat loss (HL)	0.917249	0.143896	1.6906	10
Cetartiodactyla	Antidorcas marsupialis	Overhunting (OH)	1.17925	0	2.50813	10
Cetartiodactyla	Antidorcas marsupialis	Habitat loss + Overhunting (COMB)	0.622958	0	1.30881	10
Cetartiodactyla	Antilocapra americana	Baseline (Phylacine)	7.5733	0	26.6848	45
Cetartiodactyla	Antilocapra americana	Baseline (IUCN)	1.26245	0	4.44182	5
Cetartiodactyla	Antilocapra americana	Habitat loss (HL)	1.48039	0	5.20904	5
Cetartiodactyla	Antilocapra americana	Overhunting (OH)	2.75139	0	9.8768	5
Cetartiodactyla	Antilocapra americana	Habitat loss + Overhunting (COMB)	1.8211	0	6.53687	5
Cetartiodactyla	Antilope cervicapra	Baseline (Phylacine)	0	0	0	167
Cetartiodactyla	Antilope cervicapra	Baseline (IUCN)	0	0	0	67
Cetartiodactyla	Antilope cervicapra	Habitat loss (HL)	4.78204	0	12.1193	67
Cetartiodactyla	Antilope cervicapra	Overhunting (OH)	19.7136	0	52.7537	67
Cetartiodactyla	Antilope cervicapra	Habitat loss + Overhunting (COMB)	2.819	0	7.65916	67
Chiroptera	Antrozous pallidus	Baseline (Phylacine)	0.0210847	0	0.0442833	233
Chiroptera	Antrozous pallidus	Baseline (IUCN)	0.0200934	0	0.0422012	226
Chiroptera	Antrozous pallidus	Habitat loss (HL)	0.0202572	0	0.0426252	226
Chiroptera	Antrozous pallidus	Overhunting (OH)	0.0751017	0	0.173513	226
Chiroptera	Antrozous pallidus	Habitat loss + Overhunting (COMB)	0.0369801	0	0.0852169	226
Carnivora	Aonyx capensis	Baseline (Phylacine)	86.6891	0	345.623	2308
Carnivora	Aonyx capensis	Baseline (IUCN)	82.5453	0	329.098	2225
Carnivora	Aonyx capensis	Habitat loss (HL)	43.1605	0	172.104	2225
Carnivora	Aonyx capensis	Overhunting (OH)	95.4029	0	390.354	2225
Carnivora	Aonyx capensis	Habitat loss + Overhunting (COMB)	36.1244	0	147.372	2225
Carnivora	Aonyx cinereus	Baseline (Phylacine)	0.133416	0.0458972	0.220935	1635
Carnivora	Aonyx cinereus	Baseline (IUCN)	0.127339	0.0438314	0.210847	1566
Carnivora	Aonyx cinereus	Habitat loss (HL)	0.144598	0.049123	0.240073	1566
Carnivora	Aonyx cinereus	Overhunting (OH)	18.4604	0.889886	36.6009	1566
Carnivora	Aonyx cinereus	Habitat loss + Overhunting (COMB)	0.120497	0.00475615	0.240371	1566
Carnivora	Aonyx congicus	Baseline (Phylacine)	42.4999	14.3052	70.6946	1300
Carnivora	Aonyx congicus	Baseline (IUCN)	40.9793	13.7836	68.1749	1253
Carnivora	Aonyx congicus	Habitat loss (HL)	29.8599	9.97249	49.7473	1253
Carnivora	Aonyx congicus	Overhunting (OH)	35.901	2.89965	69.3573	1253
Carnivora	Aonyx congicus	Habitat loss + Overhunting (COMB)	25.876	2.19081	49.833	1253
Primates	Aotus azarae	Baseline (Phylacine)	331.046	0	1031.58	1487
Primates	Aotus azarae	Baseline (IUCN)	304.243	0	948.065	1376
Primates	Aotus azarae	Habitat loss (HL)	271.058	0	844.664	1376
Primates	Aotus azarae	Overhunting (OH)	397.407	0	1271.54	1376
Primates	Aotus azarae	Habitat loss + Overhunting (COMB)	316.941	0	1013.95	1376
Primates	Aotus brumbacki	Baseline (Phylacine)	15.4931	2.71209	28.2742	109
Primates	Aotus brumbacki	Baseline (IUCN)	10.7131	1.87538	19.5508	70
Primates	Aotus brumbacki	Habitat loss (HL)	4.47609	0.791813	8.16036	70
Primates	Aotus brumbacki	Overhunting (OH)	10.897	0	22.2747	70
Primates	Aotus brumbacki	Habitat loss + Overhunting (COMB)	4.24113	0	8.64516	70
Primates	Aotus griseimembra	Baseline (Phylacine)	23.524	4.20758	42.8404	161
Primates	Aotus griseimembra	Baseline (IUCN)	17.7568	3.1716	32.3419	124
Primates	Aotus griseimembra	Habitat loss (HL)	7.52568	1.34198	13.7094	124
Primates	Aotus griseimembra	Overhunting (OH)	14.8103	0	30.9267	124
Primates	Aotus griseimembra	Habitat loss + Overhunting (COMB)	5.57494	0	11.5817	124
Primates	Aotus jorgehernandezi	Baseline (Phylacine)	11.1909	1.98192	20.3999	68
Primates	Aotus jorgehernandezi	Baseline (IUCN)	0.402512	0.0707252	0.734298	2
Primates	Aotus jorgehernandezi	Habitat loss (HL)	0.404492	0.0710725	0.737912	2
Primates	Aotus jorgehernandezi	Overhunting (OH)	0.352253	0	0.715593	2
Primates	Aotus jorgehernandezi	Habitat loss + Overhunting (COMB)	0.352253	0	0.715593	2
Primates	Aotus lemurinus	Baseline (Phylacine)	8.44268	0	30.7473	190
Primates	Aotus lemurinus	Baseline (IUCN)	7.49143	0	27.2767	138
Primates	Aotus lemurinus	Habitat loss (HL)	4.51432	0	16.4382	138
Primates	Aotus lemurinus	Overhunting (OH)	10.0019	0	37.3213	138
Primates	Aotus lemurinus	Habitat loss + Overhunting (COMB)	3.71095	0	13.8117	138
Primates	Aotus miconax	Baseline (Phylacine)	4.72888	0.80973	8.64803	41
Primates	Aotus miconax	Baseline (IUCN)	3.52846	0.60346	6.45347	25
Primates	Aotus miconax	Habitat loss (HL)	3.56739	0.605355	6.52942	25
Primates	Aotus miconax	Overhunting (OH)	3.06537	0	6.40848	25
Primates	Aotus miconax	Habitat loss + Overhunting (COMB)	2.16719	0	4.52771	25
Primates	Aotus nancymaae	Baseline (Phylacine)	19.0938	0	47.8983	304
Primates	Aotus nancymaae	Baseline (IUCN)	15.8417	0	39.7396	248
Primates	Aotus nancymaae	Habitat loss (HL)	15.858	0	39.7789	248
Primates	Aotus nancymaae	Overhunting (OH)	49.7317	0	129.698	248
Primates	Aotus nancymaae	Habitat loss + Overhunting (COMB)	17.4403	0	45.3586	248
Primates	Aotus nigriceps	Baseline (Phylacine)	82.9158	0	258.068	776
Primates	Aotus nigriceps	Baseline (IUCN)	76.3048	0	237.47	719
Primates	Aotus nigriceps	Habitat loss (HL)	70.1122	0	218.186	719
Primates	Aotus nigriceps	Overhunting (OH)	85.8101	0	270.856	719
Primates	Aotus nigriceps	Habitat loss + Overhunting (COMB)	76.5216	0	241.515	719
Primates	Aotus trivirgatus	Baseline (Phylacine)	21.5457	0	67.0369	401
Primates	Aotus trivirgatus	Baseline (IUCN)	19.3494	0	60.1992	361
Primates	Aotus trivirgatus	Habitat loss (HL)	16.9556	0	52.7394	361
Primates	Aotus trivirgatus	Overhunting (OH)	23.5864	0	74.8107	361
Primates	Aotus trivirgatus	Habitat loss + Overhunting (COMB)	19.5348	0	61.938	361
Primates	Aotus vociferans	Baseline (Phylacine)	66.9316	0	243.315	556
Primates	Aotus vociferans	Baseline (IUCN)	61.1513	0	222.299	501
Primates	Aotus vociferans	Habitat loss (HL)	58.5842	0	212.954	501
Primates	Aotus vociferans	Overhunting (OH)	69.8273	0	257.212	501
Primates	Aotus vociferans	Habitat loss + Overhunting (COMB)	62.5244	0	230.263	501
Primates	Aotus zonalis	Baseline (Phylacine)	4.01946	0.716382	7.32253	35
Primates	Aotus zonalis	Baseline (IUCN)	8.74465	1.55697	15.9323	67
Primates	Aotus zonalis	Habitat loss (HL)	6.30047	1.12234	11.4786	67
Primates	Aotus zonalis	Overhunting (OH)	9.11874	0	18.6851	67
Primates	Aotus zonalis	Habitat loss + Overhunting (COMB)	5.40182	0	10.9618	67
Rodentia	Apodemus agrarius	Baseline (Phylacine)	22.0638	0	79.0549	602
Rodentia	Apodemus agrarius	Baseline (IUCN)	20.5992	0	73.8097	558
Rodentia	Apodemus agrarius	Habitat loss (HL)	18.9815	0	68.015	558
Rodentia	Apodemus agrarius	Overhunting (OH)	51.6242	0	190.108	558
Rodentia	Apodemus agrarius	Habitat loss + Overhunting (COMB)	35.1533	0	129.538	558
Rodentia	Apodemus chevrieri	Baseline (Phylacine)	1.64447	0.412139	2.87681	429
Rodentia	Apodemus chevrieri	Baseline (IUCN)	1.56025	0.390908	2.72959	352
Rodentia	Apodemus chevrieri	Habitat loss (HL)	1.45033	0.362009	2.53866	352
Rodentia	Apodemus chevrieri	Overhunting (OH)	18.6979	0	38.1113	352
Rodentia	Apodemus chevrieri	Habitat loss + Overhunting (COMB)	2.51152	0	5.1113	352
Rodentia	Apodemus draco	Baseline (Phylacine)	7.13639	1.78066	12.4921	784
Rodentia	Apodemus draco	Baseline (IUCN)	6.94075	1.73205	12.1495	705
Rodentia	Apodemus draco	Habitat loss (HL)	4.73122	1.1724	8.29005	705
Rodentia	Apodemus draco	Overhunting (OH)	38.6106	4.5039e-05	78.8875	705
Rodentia	Apodemus draco	Habitat loss + Overhunting (COMB)	8.08037	4.5039e-05	16.4493	705
Rodentia	Apodemus gurkha	Baseline (Phylacine)	0.0989375	0.0296849	0.16819	19
Rodentia	Apodemus gurkha	Baseline (IUCN)	0.101799	0.0304965	0.173101	8
Rodentia	Apodemus gurkha	Habitat loss (HL)	0.0878194	0.0263036	0.149335	8
Rodentia	Apodemus gurkha	Overhunting (OH)	0.543982	0.000297987	1.09292	8
Rodentia	Apodemus gurkha	Habitat loss + Overhunting (COMB)	0.138646	0.00027336	0.277895	8
Rodentia	Apodemus latronum	Baseline (Phylacine)	2.16147	0.62427	3.69867	209
Rodentia	Apodemus latronum	Baseline (IUCN)	1.98913	0.574396	3.40387	172
Rodentia	Apodemus latronum	Habitat loss (HL)	1.85728	0.536457	3.1781	172
Rodentia	Apodemus latronum	Overhunting (OH)	9.5387	0.0264759	19.1158	172
Rodentia	Apodemus latronum	Habitat loss + Overhunting (COMB)	3.08347	0.00753063	6.17273	172
Rodentia	Apodemus pallipes	Baseline (Phylacine)	0.935298	0.240783	1.62981	68
Rodentia	Apodemus pallipes	Baseline (IUCN)	0.904306	0.232893	1.57572	58
Rodentia	Apodemus pallipes	Habitat loss (HL)	0.590086	0.151539	1.02863	58
Rodentia	Apodemus pallipes	Overhunting (OH)	3.77307	0	7.68899	58
Rodentia	Apodemus pallipes	Habitat loss + Overhunting (COMB)	1.02833	0	2.08862	58
Rodentia	Apodemus peninsulae	Baseline (Phylacine)	13.011	3.71029	22.3118	397
Rodentia	Apodemus peninsulae	Baseline (IUCN)	11.659	3.319	19.9989	359
Rodentia	Apodemus peninsulae	Habitat loss (HL)	10.7665	3.05975	18.4732	359
Rodentia	Apodemus peninsulae	Overhunting (OH)	21.8524	0.018308	43.9757	359
Rodentia	Apodemus peninsulae	Habitat loss + Overhunting (COMB)	18.3487	0.014062	36.9412	359
Rodentia	Apodemus rusiges	Baseline (Phylacine)	0.0921543	0.0229614	0.161347	7
Rodentia	Apodemus rusiges	Baseline (IUCN)	0.0882257	0.0219628	0.154489	6
Rodentia	Apodemus rusiges	Habitat loss (HL)	0.106754	0.0265354	0.186972	6
Rodentia	Apodemus rusiges	Overhunting (OH)	0.486859	0	0.991476	6
Rodentia	Apodemus rusiges	Habitat loss + Overhunting (COMB)	0.19388	0	0.395672	6
Rodentia	Apodemus semotus	Baseline (Phylacine)	0.0641482	0.0155752	0.112721	9
Rodentia	Apodemus semotus	Baseline (IUCN)	0.0641482	0.0155752	0.112721	9
Rodentia	Apodemus semotus	Habitat loss (HL)	0.0915989	0.0224265	0.160771	9
Rodentia	Apodemus semotus	Overhunting (OH)	0.414797	0	0.859354	9
Rodentia	Apodemus semotus	Habitat loss + Overhunting (COMB)	0.126369	0	0.260358	9
Rodentia	Apomys abrae	Baseline (Phylacine)	0.0418999	0.0122082	0.0715915	18
Rodentia	Apomys abrae	Baseline (IUCN)	0.0438854	0.0128041	0.0749667	12
Rodentia	Apomys abrae	Habitat loss (HL)	0.0546114	0.0159379	0.093285	12
Rodentia	Apomys abrae	Overhunting (OH)	0.321479	3.21655e-05	0.647437	12
Rodentia	Apomys abrae	Habitat loss + Overhunting (COMB)	0.0922287	3.11021e-05	0.185101	12
Rodentia	Apomys datae	Baseline (Phylacine)	0.0125732	0.00366973	0.0214767	18
Rodentia	Apomys datae	Baseline (IUCN)	0.0125632	0.00366685	0.0214595	12
Rodentia	Apomys datae	Habitat loss (HL)	0.0149477	0.00440891	0.0254865	12
Rodentia	Apomys datae	Overhunting (OH)	0.316206	0	0.637064	12
Rodentia	Apomys datae	Habitat loss + Overhunting (COMB)	0.0244506	0	0.0492494	12
Rodentia	Apomys gracilirostris	Baseline (Phylacine)	0.0538079	0.0188146	0.0888012	3
Rodentia	Apomys gracilirostris	Baseline (IUCN)	0.0293031	0.0102074	0.0483987	2
Rodentia	Apomys gracilirostris	Habitat loss (HL)	0.0202406	0.00703537	0.0334457	2
Rodentia	Apomys gracilirostris	Overhunting (OH)	0.0672208	0.00361889	0.130823	2
Rodentia	Apomys gracilirostris	Habitat loss + Overhunting (COMB)	0.0290198	0.00154269	0.0564969	2
Rodentia	Apomys hylocetes	Baseline (Phylacine)	0.00257751	0.00079179	0.00436324	10
Rodentia	Apomys hylocetes	Baseline (IUCN)	0.00272787	0.000837079	0.00461865	7
Rodentia	Apomys hylocetes	Habitat loss (HL)	0	0	0	7
Rodentia	Apomys hylocetes	Overhunting (OH)	0.213883	0.000494476	0.429016	7
Rodentia	Apomys hylocetes	Habitat loss + Overhunting (COMB)	0	0	0	7
Rodentia	Apomys insignis	Baseline (Phylacine)	0.529215	0.162476	0.895955	34
Rodentia	Apomys insignis	Baseline (IUCN)	0.529215	0.162476	0.895955	34
Rodentia	Apomys insignis	Habitat loss (HL)	0.247065	0.0753813	0.41875	34
Rodentia	Apomys insignis	Overhunting (OH)	1.03874	0.00449813	2.07992	34
Rodentia	Apomys insignis	Habitat loss + Overhunting (COMB)	0.401199	0.00171946	0.803194	34
Rodentia	Apomys littoralis	Baseline (Phylacine)	0.340058	0.106549	0.573567	23
Rodentia	Apomys littoralis	Baseline (IUCN)	0.0875227	0.0272707	0.147775	5
Rodentia	Apomys littoralis	Habitat loss (HL)	0.0378842	0.0118041	0.0639643	5
Rodentia	Apomys littoralis	Overhunting (OH)	0.15349	0.00112354	0.306536	5
Rodentia	Apomys littoralis	Habitat loss + Overhunting (COMB)	0.0592489	0.000365664	0.118191	5
Rodentia	Apomys microdon	Baseline (Phylacine)	0.437437	0.128587	0.746287	34
Rodentia	Apomys microdon	Baseline (IUCN)	0.410033	0.120285	0.699781	32
Rodentia	Apomys microdon	Habitat loss (HL)	0.460697	0.135148	0.786246	32
Rodentia	Apomys microdon	Overhunting (OH)	0.936998	0.000415009	1.8879	32
Rodentia	Apomys microdon	Habitat loss + Overhunting (COMB)	0.787944	0.000373089	1.58649	32
Rodentia	Apomys musculus	Baseline (Phylacine)	0.385811	0	1.36991	35
Rodentia	Apomys musculus	Baseline (IUCN)	0.334524	0	1.18787	25
Rodentia	Apomys musculus	Habitat loss (HL)	0.266604	0	0.947001	25
Rodentia	Apomys musculus	Overhunting (OH)	1.52009	0	5.55288	25
Rodentia	Apomys musculus	Habitat loss + Overhunting (COMB)	0.474413	0	1.73233	25
Rodentia	Apomys sacobianus	Baseline (Phylacine)	0.00395042	0.00118645	0.00671439	1
Rodentia	Apomys sacobianus	Baseline (IUCN)	0.00395042	0.00118645	0.00671439	1
Rodentia	Apomys sacobianus	Habitat loss (HL)	0.00904211	0.00271566	0.0153686	1
Rodentia	Apomys sacobianus	Overhunting (OH)	0.0298212	0	0.0599556	1
Rodentia	Apomys sacobianus	Habitat loss + Overhunting (COMB)	0.0160196	0	0.0322075	1
Chiroptera	Aproteles bulmerae	Baseline (Phylacine)	0.0344041	0	0.0794947	21
Chiroptera	Aproteles bulmerae	Baseline (IUCN)	0.00461765	0	0.0106712	2
Chiroptera	Aproteles bulmerae	Habitat loss (HL)	0.0041922	0	0.00969134	2
Chiroptera	Aproteles bulmerae	Overhunting (OH)	0.00619732	0	0.0154279	2
Chiroptera	Aproteles bulmerae	Habitat loss + Overhunting (COMB)	0.00516473	0	0.0128616	2
Rodentia	Archboldomys luzonensis	Baseline (Phylacine)	0.000151327	0	0.000535979	1
Rodentia	Archboldomys luzonensis	Baseline (IUCN)	0.000151327	0	0.000535979	1
Rodentia	Archboldomys luzonensis	Habitat loss (HL)	0	0	0	1
Rodentia	Archboldomys luzonensis	Overhunting (OH)	0.0414535	0	0.151584	1
Rodentia	Archboldomys luzonensis	Habitat loss + Overhunting (COMB)	0	0	0	1
Carnivora	Arctictis binturong	Baseline (Phylacine)	24.5114	4.93635	44.0865	1244
Carnivora	Arctictis binturong	Baseline (IUCN)	23.6446	4.76389	42.5252	1196
Carnivora	Arctictis binturong	Habitat loss (HL)	22.1961	4.47543	39.9168	1169
Carnivora	Arctictis binturong	Overhunting (OH)	17.3131	0	36.4365	1169
Carnivora	Arctictis binturong	Habitat loss + Overhunting (COMB)	15.4812	0	32.5563	1169
Primates	Arctocebus aureus	Baseline (Phylacine)	4.68035	1.86493	7.49577	321
Primates	Arctocebus aureus	Baseline (IUCN)	4.4258	1.76418	7.08742	304
Primates	Arctocebus aureus	Habitat loss (HL)	3.99659	1.59247	6.40071	304
Primates	Arctocebus aureus	Overhunting (OH)	5.19493	0.745851	9.64706	304
Primates	Arctocebus aureus	Habitat loss + Overhunting (COMB)	4.60769	0.660282	8.55568	304
Primates	Arctocebus calabarensis	Baseline (Phylacine)	1.4417	0	5.06579	75
Primates	Arctocebus calabarensis	Baseline (IUCN)	1.22568	0	4.30687	63
Primates	Arctocebus calabarensis	Habitat loss (HL)	0.806329	0	2.83326	63
Primates	Arctocebus calabarensis	Overhunting (OH)	1.48485	0	5.35131	63
Primates	Arctocebus calabarensis	Habitat loss + Overhunting (COMB)	0.814359	0	2.92885	63
Carnivora	Arctogalidia trivirgata	Baseline (Phylacine)	9.3217	3.32943	15.314	1130
Carnivora	Arctogalidia trivirgata	Baseline (IUCN)	9.02571	3.22451	14.8269	1099
Carnivora	Arctogalidia trivirgata	Habitat loss (HL)	6.54621	2.33016	10.7623	1099
Carnivora	Arctogalidia trivirgata	Overhunting (OH)	8.99389	0.57666	17.6387	1099
Carnivora	Arctogalidia trivirgata	Habitat loss + Overhunting (COMB)	6.25858	0.415032	12.202	1099
Carnivora	Arctonyx albogularis	Baseline (Phylacine)	22.3327	7.66699	36.9984	900
Carnivora	Arctonyx albogularis	Baseline (IUCN)	17.7843	6.08356	29.4851	708
Carnivora	Arctonyx albogularis	Habitat loss (HL)	16.5502	5.65905	27.4413	708
Carnivora	Arctonyx albogularis	Overhunting (OH)	12.7569	0.424494	25.9365	708
Carnivora	Arctonyx albogularis	Habitat loss + Overhunting (COMB)	11.2979	0.376512	22.9942	708
Carnivora	Arctonyx collaris	Baseline (Phylacine)	13.649	4.7576	22.5405	707
Carnivora	Arctonyx collaris	Baseline (IUCN)	11.7607	4.09402	19.4275	603
Carnivora	Arctonyx collaris	Habitat loss (HL)	7.70861	2.67169	12.7455	527
Carnivora	Arctonyx collaris	Overhunting (OH)	7.03358	0.279957	14.1931	527
Carnivora	Arctonyx collaris	Habitat loss + Overhunting (COMB)	5.31289	0.213776	10.6301	527
Carnivora	Arctonyx hoevenii	Baseline (Phylacine)	0.576458	0.209503	0.943414	90
Carnivora	Arctonyx hoevenii	Baseline (IUCN)	0.614914	0.223717	1.00611	81
Carnivora	Arctonyx hoevenii	Habitat loss (HL)	0.581678	0.211456	0.9519	81
Carnivora	Arctonyx hoevenii	Overhunting (OH)	1.2674	0.0982301	2.44138	81
Carnivora	Arctonyx hoevenii	Habitat loss + Overhunting (COMB)	0.454364	0.0375222	0.871953	81
Chiroptera	Arielulus aureocollaris	Baseline (Phylacine)	0.00252971	0	0.00520336	18
Chiroptera	Arielulus aureocollaris	Baseline (IUCN)	0.0202198	0	0.0416069	145
Chiroptera	Arielulus aureocollaris	Habitat loss (HL)	0.0132199	0	0.027209	145
Chiroptera	Arielulus aureocollaris	Overhunting (OH)	0.0386741	0	0.088784	145
Chiroptera	Arielulus aureocollaris	Habitat loss + Overhunting (COMB)	0.023756	0	0.0544864	145
Chiroptera	Arielulus circumdatus	Baseline (Phylacine)	0.00960148	0	0.0197736	150
Chiroptera	Arielulus circumdatus	Baseline (IUCN)	0.00676493	0	0.0139281	98
Chiroptera	Arielulus circumdatus	Habitat loss (HL)	0.0044817	0	0.00922691	98
Chiroptera	Arielulus circumdatus	Overhunting (OH)	0.0298433	0	0.0686444	98
Chiroptera	Arielulus circumdatus	Habitat loss + Overhunting (COMB)	0.00846219	0	0.0194634	98
Chiroptera	Arielulus cuprosus	Baseline (Phylacine)	0.00560658	0	0.0114244	37
Chiroptera	Arielulus cuprosus	Baseline (IUCN)	0.00135859	0	0.00276626	9
Chiroptera	Arielulus cuprosus	Habitat loss (HL)	0.00114547	0	0.00233269	9
Chiroptera	Arielulus cuprosus	Overhunting (OH)	0.00299379	0	0.00681222	9
Chiroptera	Arielulus cuprosus	Habitat loss + Overhunting (COMB)	0.00233438	0	0.00530163	9
Chiroptera	Arielulus societatis	Baseline (Phylacine)	0.000499027	0	0.00101477	19
Chiroptera	Arielulus societatis	Baseline (IUCN)	0.00225203	0	0.0045728	53
Chiroptera	Arielulus societatis	Habitat loss (HL)	0.000602623	0	0.00122329	53
Chiroptera	Arielulus societatis	Overhunting (OH)	0.0196049	0	0.0449496	53
Chiroptera	Arielulus societatis	Habitat loss + Overhunting (COMB)	0.00138509	0	0.00320931	53
Chiroptera	Arielulus torquatus	Baseline (Phylacine)	0.000804879	0	0.0016571	9
Chiroptera	Arielulus torquatus	Baseline (IUCN)	0.000804879	0	0.0016571	9
Chiroptera	Arielulus torquatus	Habitat loss (HL)	0.000523183	0	0.00107751	9
Chiroptera	Arielulus torquatus	Overhunting (OH)	0.00270242	0	0.00628789	9
Chiroptera	Arielulus torquatus	Habitat loss + Overhunting (COMB)	0.000794319	0	0.00184516	9
Chiroptera	Ariteus flavescens	Baseline (Phylacine)	0.000841675	0	0.00173927	4
Chiroptera	Ariteus flavescens	Baseline (IUCN)	0.000841675	0	0.00173927	4
Chiroptera	Ariteus flavescens	Habitat loss (HL)	0.00119273	0	0.00246557	4
Chiroptera	Ariteus flavescens	Overhunting (OH)	0.00263923	0	0.00614812	4
Chiroptera	Ariteus flavescens	Habitat loss + Overhunting (COMB)	0.00211179	0	0.00491682	4
Chiroptera	Artibeus amplus	Baseline (Phylacine)	0.545252	0	1.15923	764
Chiroptera	Artibeus amplus	Baseline (IUCN)	0.490054	0	1.04146	649
Chiroptera	Artibeus amplus	Habitat loss (HL)	0.294539	0	0.626335	649
Chiroptera	Artibeus amplus	Overhunting (OH)	0.87115	0	2.01495	649
Chiroptera	Artibeus amplus	Habitat loss + Overhunting (COMB)	0.397694	0	0.92061	649
Chiroptera	Artibeus concolor	Baseline (Phylacine)	1.2207	0	2.54038	2571
Chiroptera	Artibeus concolor	Baseline (IUCN)	1.17999	0	2.45574	2483
Chiroptera	Artibeus concolor	Habitat loss (HL)	1.03965	0	2.16435	2483
Chiroptera	Artibeus concolor	Overhunting (OH)	2.54179	0	5.76767	2483
Chiroptera	Artibeus concolor	Habitat loss + Overhunting (COMB)	1.78502	0	4.05519	2483
Chiroptera	Artibeus fimbriatus	Baseline (Phylacine)	0.592696	0	1.2626	612
Chiroptera	Artibeus fimbriatus	Baseline (IUCN)	0.558581	0	1.19005	565
Chiroptera	Artibeus fimbriatus	Habitat loss (HL)	0.151074	0	0.321898	565
Chiroptera	Artibeus fimbriatus	Overhunting (OH)	0.995237	0	2.30428	565
Chiroptera	Artibeus fimbriatus	Habitat loss + Overhunting (COMB)	0.227163	0	0.526013	565
Chiroptera	Artibeus fraterculus	Baseline (Phylacine)	0.0698071	0	0.147065	79
Chiroptera	Artibeus fraterculus	Baseline (IUCN)	0.0624908	0	0.131645	71
Chiroptera	Artibeus fraterculus	Habitat loss (HL)	0.0616703	0	0.129921	71
Chiroptera	Artibeus fraterculus	Overhunting (OH)	0.107647	0	0.247237	71
Chiroptera	Artibeus fraterculus	Habitat loss + Overhunting (COMB)	0.0796824	0	0.182765	71
Chiroptera	Artibeus hirsutus	Baseline (Phylacine)	0.0368418	0	0.0782333	114
Chiroptera	Artibeus hirsutus	Baseline (IUCN)	0.0312704	0	0.066435	101
Chiroptera	Artibeus hirsutus	Habitat loss (HL)	0.0581651	0	0.12357	101
Chiroptera	Artibeus hirsutus	Overhunting (OH)	0.135398	0	0.312541	101
Chiroptera	Artibeus hirsutus	Habitat loss + Overhunting (COMB)	0.0988316	0	0.228164	101
Chiroptera	Artibeus inopinatus	Baseline (Phylacine)	0.0135919	0	0.0283738	31
Chiroptera	Artibeus inopinatus	Baseline (IUCN)	0.0107543	0	0.0224468	23
Chiroptera	Artibeus inopinatus	Habitat loss (HL)	0.0114712	0	0.0239462	23
Chiroptera	Artibeus inopinatus	Overhunting (OH)	0.0268094	0	0.0620346	23
Chiroptera	Artibeus inopinatus	Habitat loss + Overhunting (COMB)	0.0223707	0	0.0518462	23
Chiroptera	Artibeus jamaicensis	Baseline (Phylacine)	0.292126	0	0.620572	632
Chiroptera	Artibeus jamaicensis	Baseline (IUCN)	0.285351	0	0.606238	617
Chiroptera	Artibeus jamaicensis	Habitat loss (HL)	0.149261	0	0.317392	617
Chiroptera	Artibeus jamaicensis	Overhunting (OH)	0.829979	0	1.92529	617
Chiroptera	Artibeus jamaicensis	Habitat loss + Overhunting (COMB)	0.225942	0	0.523135	617
Chiroptera	Artibeus lituratus	Baseline (Phylacine)	3.6255	0	7.6686	5445
Chiroptera	Artibeus lituratus	Baseline (IUCN)	3.60238	0	7.61956	5415
Chiroptera	Artibeus lituratus	Habitat loss (HL)	3.12154	0	6.603	5415
Chiroptera	Artibeus lituratus	Overhunting (OH)	7.66467	0	17.5877	5415
Chiroptera	Artibeus lituratus	Habitat loss + Overhunting (COMB)	4.92948	0	11.3165	5415
Chiroptera	Artibeus obscurus	Baseline (Phylacine)	2.72733	0	5.76306	4418
Chiroptera	Artibeus obscurus	Baseline (IUCN)	2.69782	0	5.70069	4354
Chiroptera	Artibeus obscurus	Habitat loss (HL)	2.40767	0	5.08817	4354
Chiroptera	Artibeus obscurus	Overhunting (OH)	6.11438	0	14.0077	4354
Chiroptera	Artibeus obscurus	Habitat loss + Overhunting (COMB)	4.03166	0	9.23158	4354
Chiroptera	Artibeus planirostris	Baseline (Phylacine)	2.33434	0	4.93513	3324
Chiroptera	Artibeus planirostris	Baseline (IUCN)	2.2226	0	4.69894	3143
Chiroptera	Artibeus planirostris	Habitat loss (HL)	1.91093	0	4.04089	3143
Chiroptera	Artibeus planirostris	Overhunting (OH)	4.21882	0	9.67863	3143
Chiroptera	Artibeus planirostris	Habitat loss + Overhunting (COMB)	3.02249	0	6.93619	3143
Chiroptera	Artibeus schwartzi	Baseline (Phylacine)	0.0012871	0	0.00271806	5
Chiroptera	Artibeus schwartzi	Baseline (IUCN)	0.000246485	0	0.000520682	2
Chiroptera	Artibeus schwartzi	Habitat loss (HL)	0	0	0	2
Chiroptera	Artibeus schwartzi	Overhunting (OH)	0.00311439	0	0.00727407	2
Chiroptera	Artibeus schwartzi	Habitat loss + Overhunting (COMB)	0	0	0	2
Rodentia	Arvicanthis abyssinicus	Baseline (Phylacine)	0.0829269	0	0.250974	38
Rodentia	Arvicanthis abyssinicus	Baseline (IUCN)	0.0630573	0	0.190823	30
Rodentia	Arvicanthis abyssinicus	Habitat loss (HL)	2.17281	0	6.57781	30
Rodentia	Arvicanthis abyssinicus	Overhunting (OH)	12.1792	0	38.2748	30
Rodentia	Arvicanthis abyssinicus	Habitat loss + Overhunting (COMB)	3.32134	0	10.4391	30
Rodentia	Arvicanthis ansorgei	Baseline (Phylacine)	0.393645	0.127701	0.65959	122
Rodentia	Arvicanthis ansorgei	Baseline (IUCN)	0.365739	0.118491	0.612987	109
Rodentia	Arvicanthis ansorgei	Habitat loss (HL)	0.853284	0.277184	1.42938	109
Rodentia	Arvicanthis ansorgei	Overhunting (OH)	9.48132	0.227904	18.735	109
Rodentia	Arvicanthis ansorgei	Habitat loss + Overhunting (COMB)	1.52099	0.0340379	3.00795	109
Rodentia	Arvicanthis blicki	Baseline (Phylacine)	0.0391046	0.0136209	0.0645883	11
Rodentia	Arvicanthis blicki	Baseline (IUCN)	0.0391046	0.0136209	0.0645883	8
Rodentia	Arvicanthis blicki	Habitat loss (HL)	0.012962	0.00452147	0.0214026	8
Rodentia	Arvicanthis blicki	Overhunting (OH)	0.832037	0.0408959	1.62318	8
Rodentia	Arvicanthis blicki	Habitat loss + Overhunting (COMB)	0.0174269	0.000723113	0.0341308	8
Rodentia	Arvicanthis nairobae	Baseline (Phylacine)	0.49159	0.170355	0.812825	17
Rodentia	Arvicanthis nairobae	Baseline (IUCN)	0.34227	0.118698	0.565842	12
Rodentia	Arvicanthis nairobae	Habitat loss (HL)	0.249771	0.086652	0.412889	12
Rodentia	Arvicanthis nairobae	Overhunting (OH)	1.26432	0.0598634	2.47599	12
Rodentia	Arvicanthis nairobae	Habitat loss + Overhunting (COMB)	0.403087	0.0268118	0.779362	12
Rodentia	Arvicanthis neumanni	Baseline (Phylacine)	3.77326	0	13.3104	104
Rodentia	Arvicanthis neumanni	Baseline (IUCN)	3.43762	0	12.1263	95
Rodentia	Arvicanthis neumanni	Habitat loss (HL)	3.87329	0	13.664	95
Rodentia	Arvicanthis neumanni	Overhunting (OH)	20.4463	0	73.7592	95
Rodentia	Arvicanthis neumanni	Habitat loss + Overhunting (COMB)	6.12078	0	22.0597	95
Rodentia	Arvicanthis niloticus	Baseline (Phylacine)	15.6369	5.38352	25.8902	640
Rodentia	Arvicanthis niloticus	Baseline (IUCN)	14.2444	4.9111	23.5778	585
Rodentia	Arvicanthis niloticus	Habitat loss (HL)	24.8712	8.59656	41.1458	585
Rodentia	Arvicanthis niloticus	Overhunting (OH)	56.3156	3.3074	109.343	585
Rodentia	Arvicanthis niloticus	Habitat loss + Overhunting (COMB)	39.0071	2.09938	75.9326	585
Rodentia	Arvicanthis rufinus	Baseline (Phylacine)	5.02359	1.69822	8.34897	345
Rodentia	Arvicanthis rufinus	Baseline (IUCN)	4.79456	1.62213	7.96699	334
Rodentia	Arvicanthis rufinus	Habitat loss (HL)	11.9805	4.03842	19.9225	334
Rodentia	Arvicanthis rufinus	Overhunting (OH)	27.9377	1.01373	54.8685	334
Rodentia	Arvicanthis rufinus	Habitat loss + Overhunting (COMB)	19.4559	0.672877	38.2458	334
Chiroptera	Asellia patrizii	Baseline (Phylacine)	0.000136598	0	0.000278826	1
Chiroptera	Asellia patrizii	Baseline (IUCN)	0	0	0	0
Chiroptera	Asellia patrizii	Habitat loss (HL)	0	0	0	0
Chiroptera	Asellia patrizii	Overhunting (OH)	0	0	0	0
Chiroptera	Asellia patrizii	Habitat loss + Overhunting (COMB)	0	0	0	0
Chiroptera	Asellia tridens	Baseline (Phylacine)	0.00574183	0	0.0117354	63
Chiroptera	Asellia tridens	Baseline (IUCN)	0.00493569	0	0.0100937	49
Chiroptera	Asellia tridens	Habitat loss (HL)	0.0040565	0	0.00829405	49
Chiroptera	Asellia tridens	Overhunting (OH)	0.0150383	0	0.0343845	49
Chiroptera	Asellia tridens	Habitat loss + Overhunting (COMB)	0.00774429	0	0.0177088	49
Chiroptera	Aselliscus stoliczkanus	Baseline (Phylacine)	0.08811	0	0.181252	609
Chiroptera	Aselliscus stoliczkanus	Baseline (IUCN)	0.0821024	0	0.168892	571
Chiroptera	Aselliscus stoliczkanus	Habitat loss (HL)	0.0461449	0	0.0948975	571
Chiroptera	Aselliscus stoliczkanus	Overhunting (OH)	0.177462	0	0.4076	571
Chiroptera	Aselliscus stoliczkanus	Habitat loss + Overhunting (COMB)	0.0824778	0	0.18903	571
Chiroptera	Aselliscus tricuspidatus	Baseline (Phylacine)	0.00290304	0	0.00634342	152
Chiroptera	Aselliscus tricuspidatus	Baseline (IUCN)	0.0024522	0	0.00535632	122
Chiroptera	Aselliscus tricuspidatus	Habitat loss (HL)	0.00302211	0	0.00660203	122
Chiroptera	Aselliscus tricuspidatus	Overhunting (OH)	0.00586978	0	0.014105	122
Chiroptera	Aselliscus tricuspidatus	Habitat loss + Overhunting (COMB)	0.00509087	0	0.0122292	122
Eulipotyphla	Atelerix albiventris	Baseline (Phylacine)	4.478	1.58652	7.36947	1022
Eulipotyphla	Atelerix albiventris	Baseline (IUCN)	4.16835	1.47795	6.85874	890
Eulipotyphla	Atelerix albiventris	Habitat loss (HL)	5.04666	1.79072	8.30259	890
Eulipotyphla	Atelerix albiventris	Overhunting (OH)	13.0317	0.811649	25.2798	890
Eulipotyphla	Atelerix albiventris	Habitat loss + Overhunting (COMB)	7.2471	0.422661	14.0788	890
Eulipotyphla	Atelerix frontalis	Baseline (Phylacine)	0.204358	0.0702604	0.338456	19
Eulipotyphla	Atelerix frontalis	Baseline (IUCN)	0.121635	0.0419536	0.201317	10
Eulipotyphla	Atelerix frontalis	Habitat loss (HL)	0.126067	0.0433837	0.208751	10
Eulipotyphla	Atelerix frontalis	Overhunting (OH)	0.198679	0.00924068	0.388117	10
Eulipotyphla	Atelerix frontalis	Habitat loss + Overhunting (COMB)	0.184741	0.00866632	0.360815	10
Primates	Ateles belzebuth	Baseline (Phylacine)	508.971	0	1459.83	659
Primates	Ateles belzebuth	Baseline (IUCN)	334.92	0	960.492	442
Primates	Ateles belzebuth	Habitat loss (HL)	305.7	0	876.603	442
Primates	Ateles belzebuth	Overhunting (OH)	241.774	0	711.516	442
Primates	Ateles belzebuth	Habitat loss + Overhunting (COMB)	184.037	0	540.32	442
Primates	Ateles chamek	Baseline (Phylacine)	685.32	0	1740.41	1173
Primates	Ateles chamek	Baseline (IUCN)	666.121	0	1691.79	1134
Primates	Ateles chamek	Habitat loss (HL)	574.952	0	1459.74	1134
Primates	Ateles chamek	Overhunting (OH)	471.359	0	1219.85	1134
Primates	Ateles chamek	Habitat loss + Overhunting (COMB)	399.204	0	1032.21	1134
Primates	Ateles fusciceps	Baseline (Phylacine)	112.16	0	321.851	137
Primates	Ateles fusciceps	Baseline (IUCN)	99.0291	0	284.137	114
Primates	Ateles fusciceps	Habitat loss (HL)	61.5439	0	176.561	114
Primates	Ateles fusciceps	Overhunting (OH)	49.549	0	148.222	114
Primates	Ateles fusciceps	Habitat loss + Overhunting (COMB)	29.2597	0	86.85	114
Primates	Ateles geoffroyi	Baseline (Phylacine)	612.555	0	1601.88	370
Primates	Ateles geoffroyi	Baseline (IUCN)	611.754	0	1599.79	367
Primates	Ateles geoffroyi	Habitat loss (HL)	316.284	0	827.082	367
Primates	Ateles geoffroyi	Overhunting (OH)	314.414	0	845.261	367
Primates	Ateles geoffroyi	Habitat loss + Overhunting (COMB)	147.528	0	394.909	367
Primates	Ateles hybridus	Baseline (Phylacine)	158.89	0	405.816	178
Primates	Ateles hybridus	Baseline (IUCN)	97.3395	0	248.432	102
Primates	Ateles hybridus	Habitat loss (HL)	52.421	0	133.806	102
Primates	Ateles hybridus	Overhunting (OH)	73.5791	0	203.794	102
Primates	Ateles hybridus	Habitat loss + Overhunting (COMB)	26.5202	0	73.2039	102
Primates	Ateles marginatus	Baseline (Phylacine)	171.131	0	490.089	295
Primates	Ateles marginatus	Baseline (IUCN)	146.094	0	418.396	256
Primates	Ateles marginatus	Habitat loss (HL)	124.119	0	355.43	256
Primates	Ateles marginatus	Overhunting (OH)	175.041	0	516.868	256
Primates	Ateles marginatus	Habitat loss + Overhunting (COMB)	147.08	0	434.224	256
Primates	Ateles paniscus	Baseline (Phylacine)	254.892	0	731.079	507
Primates	Ateles paniscus	Baseline (IUCN)	202.884	0	581.747	412
Primates	Ateles paniscus	Habitat loss (HL)	186.571	0	534.833	412
Primates	Ateles paniscus	Overhunting (OH)	166.646	0	481.867	412
Primates	Ateles paniscus	Habitat loss + Overhunting (COMB)	144.398	0	417.313	412
Carnivora	Atelocynus microtis	Baseline (Phylacine)	15.2943	5.70773	24.8809	1355
Carnivora	Atelocynus microtis	Baseline (IUCN)	14.1986	5.29252	23.1048	1255
Carnivora	Atelocynus microtis	Habitat loss (HL)	13.7836	5.13682	22.4304	1255
Carnivora	Atelocynus microtis	Overhunting (OH)	15.314	3.02503	27.6194	1255
Carnivora	Atelocynus microtis	Habitat loss + Overhunting (COMB)	14.6982	2.91167	26.4978	1255
Rodentia	Atherurus africanus	Baseline (Phylacine)	49.8557	0	135.301	1456
Rodentia	Atherurus africanus	Baseline (IUCN)	49.1778	0	133.463	1425
Rodentia	Atherurus africanus	Habitat loss (HL)	38.3643	0	104.154	1425
Rodentia	Atherurus africanus	Overhunting (OH)	60.928	0	168.051	1425
Rodentia	Atherurus africanus	Habitat loss + Overhunting (COMB)	43.1282	0	118.916	1425
Rodentia	Atherurus macrourus	Baseline (Phylacine)	83.1672	29.8794	136.455	998
Rodentia	Atherurus macrourus	Baseline (IUCN)	79.4311	28.5343	130.328	957
Rodentia	Atherurus macrourus	Habitat loss (HL)	43.7099	15.6071	71.8127	957
Rodentia	Atherurus macrourus	Overhunting (OH)	76.5197	5.1895	148.104	957
Rodentia	Atherurus macrourus	Habitat loss + Overhunting (COMB)	41.1976	2.86498	79.6053	957
Carnivora	Atilax paludinosus	Baseline (Phylacine)	21.8077	8.53913	35.0764	3548
Carnivora	Atilax paludinosus	Baseline (IUCN)	21.8058	8.53832	35.0732	3545
Carnivora	Atilax paludinosus	Habitat loss (HL)	12.8647	5.01372	20.7156	3545
Carnivora	Atilax paludinosus	Overhunting (OH)	33.1062	5.32638	61.4533	3545
Carnivora	Atilax paludinosus	Habitat loss + Overhunting (COMB)	15.9263	2.91111	29.0462	3545
Rodentia	Auliscomys boliviensis	Baseline (Phylacine)	8.78328e-06	0	3.14825e-05	18
Rodentia	Auliscomys boliviensis	Baseline (IUCN)	8.78328e-06	0	3.14825e-05	12
Rodentia	Auliscomys boliviensis	Habitat loss (HL)	0	0	0	12
Rodentia	Auliscomys boliviensis	Overhunting (OH)	3.57157	0	13.0714	12
Rodentia	Auliscomys boliviensis	Habitat loss + Overhunting (COMB)	0	0	0	12
Rodentia	Auliscomys pictus	Baseline (Phylacine)	0.701479	0	2.52239	50
Rodentia	Auliscomys pictus	Baseline (IUCN)	0.700418	0	2.51857	30
Rodentia	Auliscomys pictus	Habitat loss (HL)	0.710431	0	2.55708	30
Rodentia	Auliscomys pictus	Overhunting (OH)	9.06707	0	33.2427	30
Rodentia	Auliscomys pictus	Habitat loss + Overhunting (COMB)	1.01163	0	3.71333	30
Rodentia	Auliscomys sublimis	Baseline (Phylacine)	0.00281778	0	0.0101377	33
Rodentia	Auliscomys sublimis	Baseline (IUCN)	0.0013364	0	0.00481026	11
Rodentia	Auliscomys sublimis	Habitat loss (HL)	0	0	0	11
Rodentia	Auliscomys sublimis	Overhunting (OH)	3.05343	0	11.2073	11
Rodentia	Auliscomys sublimis	Habitat loss + Overhunting (COMB)	0	0	0	11
Chiroptera	Austronomus kuboriensis	Baseline (Phylacine)	0.00446657	0	0.0093325	124
Chiroptera	Austronomus kuboriensis	Baseline (IUCN)	0.00430134	0	0.00898626	93
Chiroptera	Austronomus kuboriensis	Habitat loss (HL)	0.00399601	0	0.00834265	93
Chiroptera	Austronomus kuboriensis	Overhunting (OH)	0.0270594	0	0.0626312	93
Chiroptera	Austronomus kuboriensis	Habitat loss + Overhunting (COMB)	0.00576102	0	0.0133099	93
Primates	Avahi betsileo	Baseline (Phylacine)	0.452024	0.189191	0.714857	9
Primates	Avahi betsileo	Baseline (IUCN)	0.167253	0.0701973	0.264309	3
Primates	Avahi betsileo	Habitat loss (HL)	0.0944422	0.0396444	0.14924	3
Primates	Avahi betsileo	Overhunting (OH)	0.138875	0.018247	0.259503	3
Primates	Avahi betsileo	Habitat loss + Overhunting (COMB)	0.0736456	0.00971197	0.137579	3
Primates	Avahi cleesei	Baseline (Phylacine)	0.0566026	0.0220086	0.0911967	9
Primates	Avahi cleesei	Baseline (IUCN)	0.00797568	0.00311481	0.0128365	1
Primates	Avahi cleesei	Habitat loss (HL)	0	0	0	1
Primates	Avahi cleesei	Overhunting (OH)	0.0543038	0.00614024	0.102467	1
Primates	Avahi cleesei	Habitat loss + Overhunting (COMB)	0	0	0	1
Primates	Avahi laniger	Baseline (Phylacine)	5.08942	0.959513	9.21934	49
Primates	Avahi laniger	Baseline (IUCN)	3.39668	0.640186	6.15318	31
Primates	Avahi laniger	Habitat loss (HL)	1.65217	0.311151	2.99318	31
Primates	Avahi laniger	Overhunting (OH)	3.03095	0	6.17626	31
Primates	Avahi laniger	Habitat loss + Overhunting (COMB)	1.27415	0	2.5949	31
Primates	Avahi meridionalis	Baseline (Phylacine)	0.422246	0.173441	0.671051	7
Primates	Avahi meridionalis	Baseline (IUCN)	0.14671	0.0599699	0.23345	3
Primates	Avahi meridionalis	Habitat loss (HL)	0.156434	0.0639707	0.248897	3
Primates	Avahi meridionalis	Overhunting (OH)	0.204226	0.0255366	0.382915	3
Primates	Avahi meridionalis	Habitat loss + Overhunting (COMB)	0.125023	0.0156772	0.234368	3
Primates	Avahi mooreorum	Baseline (Phylacine)	0.342768	0	1.2018	3
Primates	Avahi mooreorum	Baseline (IUCN)	0.271225	0	0.950607	2
Primates	Avahi mooreorum	Habitat loss (HL)	0.339697	0	1.19059	2
Primates	Avahi mooreorum	Overhunting (OH)	0.276085	0	0.990116	2
Primates	Avahi mooreorum	Habitat loss + Overhunting (COMB)	0.272754	0	0.978171	2
Primates	Avahi occidentalis	Baseline (Phylacine)	0.374861	0.155931	0.593792	10
Primates	Avahi occidentalis	Baseline (IUCN)	0.0786448	0.0322967	0.124993	2
Primates	Avahi occidentalis	Habitat loss (HL)	0.0724312	0.0297322	0.11513	2
Primates	Avahi occidentalis	Overhunting (OH)	0.1161	0.0233318	0.208868	2
Primates	Avahi occidentalis	Habitat loss + Overhunting (COMB)	0.0731102	0.0146939	0.131527	2
Primates	Avahi peyrierasi	Baseline (Phylacine)	0.925364	0.38674	1.46399	17
Primates	Avahi peyrierasi	Baseline (IUCN)	0.320682	0.134229	0.507135	6
Primates	Avahi peyrierasi	Habitat loss (HL)	0.12078	0.0505746	0.190986	6
Primates	Avahi peyrierasi	Overhunting (OH)	0.28917	0.0380882	0.540252	6
Primates	Avahi peyrierasi	Habitat loss + Overhunting (COMB)	0.0959765	0.0126722	0.179281	6
Primates	Avahi ramanantsoavanai	Baseline (Phylacine)	0.869719	0.359351	1.38009	15
Primates	Avahi ramanantsoavanai	Baseline (IUCN)	0.563471	0.232076	0.894866	8
Primates	Avahi ramanantsoavanai	Habitat loss (HL)	0.247177	0.101547	0.392807	8
Primates	Avahi ramanantsoavanai	Overhunting (OH)	0.517386	0.0661157	0.968656	8
Primates	Avahi ramanantsoavanai	Habitat loss + Overhunting (COMB)	0.204413	0.0260225	0.382804	8
Primates	Avahi unicolor	Baseline (Phylacine)	0.828424	0.343481	1.31337	18
Primates	Avahi unicolor	Baseline (IUCN)	0.0905178	0.0375012	0.143534	2
Primates	Avahi unicolor	Habitat loss (HL)	0.0714447	0.0296005	0.113289	2
Primates	Avahi unicolor	Overhunting (OH)	0.0768652	0.00985726	0.143873	2
Primates	Avahi unicolor	Habitat loss + Overhunting (COMB)	0.0555728	0.00715444	0.103991	2
Cetartiodactyla	Axis axis	Baseline (Phylacine)	577.484	177.617	977.351	207
Cetartiodactyla	Axis axis	Baseline (IUCN)	556.833	171.435	942.231	190
Cetartiodactyla	Axis axis	Habitat loss (HL)	446.925	138.307	755.544	190
Cetartiodactyla	Axis axis	Overhunting (OH)	376.614	28.3159	738.636	190
Cetartiodactyla	Axis axis	Habitat loss + Overhunting (COMB)	280.567	22.6434	542.963	190
Cetartiodactyla	Axis porcinus	Baseline (Phylacine)	1.49879	0	3.78875	254
Cetartiodactyla	Axis porcinus	Baseline (IUCN)	1.05843	0	2.67462	136
Cetartiodactyla	Axis porcinus	Habitat loss (HL)	0.881796	0	2.22695	92
Cetartiodactyla	Axis porcinus	Overhunting (OH)	69.7531	0	187.319	92
Cetartiodactyla	Axis porcinus	Habitat loss + Overhunting (COMB)	0.903645	0	2.40017	92
Cetartiodactyla	Babyrousa babyrussa	Baseline (Phylacine)	0.723422	0.296151	1.15069	6
Cetartiodactyla	Babyrousa babyrussa	Baseline (IUCN)	0.723422	0.296151	1.15069	6
Cetartiodactyla	Babyrousa babyrussa	Habitat loss (HL)	1.05209	0.439271	1.66491	6
Cetartiodactyla	Babyrousa babyrussa	Overhunting (OH)	1.05238	0.141084	1.96368	6
Cetartiodactyla	Babyrousa babyrussa	Habitat loss + Overhunting (COMB)	0.762302	0.102361	1.42224	6
Cetartiodactyla	Babyrousa celebensis	Baseline (Phylacine)	4.86235	1.89601	7.82869	63
Cetartiodactyla	Babyrousa celebensis	Baseline (IUCN)	4.95051	1.93093	7.97008	65
Cetartiodactyla	Babyrousa celebensis	Habitat loss (HL)	3.52734	1.37314	5.68153	59
Cetartiodactyla	Babyrousa celebensis	Overhunting (OH)	3.27568	0.316802	6.25837	59
Cetartiodactyla	Babyrousa celebensis	Habitat loss + Overhunting (COMB)	2.1503	0.220005	4.08791	59
Rodentia	Baiomys musculus	Baseline (Phylacine)	3.40903	0.434243	6.38382	225
Rodentia	Baiomys musculus	Baseline (IUCN)	2.85117	0.365451	5.33688	197
Rodentia	Baiomys musculus	Habitat loss (HL)	2.79202	0.357299	5.22674	197
Rodentia	Baiomys musculus	Overhunting (OH)	9.06457	0	19.1009	197
Rodentia	Baiomys musculus	Habitat loss + Overhunting (COMB)	5.65556	0	11.9212	197
Rodentia	Baiomys taylori	Baseline (Phylacine)	2.63692	0.344693	4.92914	157
Rodentia	Baiomys taylori	Baseline (IUCN)	1.91438	0.251154	3.57761	122
Rodentia	Baiomys taylori	Habitat loss (HL)	1.87506	0.245398	3.50473	122
Rodentia	Baiomys taylori	Overhunting (OH)	6.37157	0	13.3709	122
Rodentia	Baiomys taylori	Habitat loss + Overhunting (COMB)	3.75367	0	7.87765	122
Rodentia	Baiyankamys habbema	Baseline (Phylacine)	0.000656149	0.000204632	0.00110767	8
Rodentia	Baiyankamys habbema	Baseline (IUCN)	0.000337537	0.000105393	0.000569681	2
Rodentia	Baiyankamys habbema	Habitat loss (HL)	0	0	0	2
Rodentia	Baiyankamys habbema	Overhunting (OH)	0.0194812	0.000545039	0.0384173	2
Rodentia	Baiyankamys habbema	Habitat loss + Overhunting (COMB)	0	0	0	2
Rodentia	Baiyankamys shawmayeri	Baseline (Phylacine)	0.114403	0.0332011	0.195605	62
Rodentia	Baiyankamys shawmayeri	Baseline (IUCN)	0.0979559	0.0284171	0.167495	41
Rodentia	Baiyankamys shawmayeri	Habitat loss (HL)	0.0668402	0.0193915	0.114289	41
Rodentia	Baiyankamys shawmayeri	Overhunting (OH)	0.29048	0.000416351	0.5819	41
Rodentia	Baiyankamys shawmayeri	Habitat loss + Overhunting (COMB)	0.0884924	1.33084e-05	0.177282	41
Chiroptera	Balantiopteryx infusca	Baseline (Phylacine)	0.00111605	0	0.00228381	15
Chiroptera	Balantiopteryx infusca	Baseline (IUCN)	0.000501083	0	0.00102521	7
Chiroptera	Balantiopteryx infusca	Habitat loss (HL)	0.000198979	0	0.000406959	7
Chiroptera	Balantiopteryx infusca	Overhunting (OH)	0.00214325	0	0.00483527	7
Chiroptera	Balantiopteryx infusca	Habitat loss + Overhunting (COMB)	0.000301832	0	0.000676895	7
Chiroptera	Balantiopteryx io	Baseline (Phylacine)	0.00172005	0	0.00376426	125
Chiroptera	Balantiopteryx io	Baseline (IUCN)	0.00146162	0	0.00319853	95
Chiroptera	Balantiopteryx io	Habitat loss (HL)	0.000556044	0	0.00121775	95
Chiroptera	Balantiopteryx io	Overhunting (OH)	0.00457812	0	0.0108963	95
Chiroptera	Balantiopteryx io	Habitat loss + Overhunting (COMB)	0.00111576	0	0.0026529	95
Chiroptera	Balantiopteryx plicata	Baseline (Phylacine)	0.0271301	0	0.0561551	348
Chiroptera	Balantiopteryx plicata	Baseline (IUCN)	0.0243743	0	0.0504544	319
Chiroptera	Balantiopteryx plicata	Habitat loss (HL)	0.0241823	0	0.0500759	319
Chiroptera	Balantiopteryx plicata	Overhunting (OH)	0.0840638	0	0.19216	319
Chiroptera	Balantiopteryx plicata	Habitat loss + Overhunting (COMB)	0.0494638	0	0.112921	319
Chiroptera	Balionycteris maculata	Baseline (Phylacine)	0.750574	0	1.87895	276
Chiroptera	Balionycteris maculata	Baseline (IUCN)	0.527771	0	1.32128	196
Chiroptera	Balionycteris maculata	Habitat loss (HL)	0.440052	0	1.10177	196
Chiroptera	Balionycteris maculata	Overhunting (OH)	1.16332	0	3.1115	196
Chiroptera	Balionycteris maculata	Habitat loss + Overhunting (COMB)	0.850945	0	2.27561	196
Rodentia	Bandicota bengalensis	Baseline (Phylacine)	15.552	5.44271	25.6613	476
Rodentia	Bandicota bengalensis	Baseline (IUCN)	15.1502	5.30364	24.9967	462
Rodentia	Bandicota bengalensis	Habitat loss (HL)	15.2279	5.33734	25.1184	462
Rodentia	Bandicota bengalensis	Overhunting (OH)	22.8348	1.28936	44.3824	462
Rodentia	Bandicota bengalensis	Habitat loss + Overhunting (COMB)	20.7334	1.16656	40.3023	462
Rodentia	Bandicota indica	Baseline (Phylacine)	0.545278	0.191422	0.899134	1092
Rodentia	Bandicota indica	Baseline (IUCN)	0.561474	0.197158	0.925791	1059
Rodentia	Bandicota indica	Habitat loss (HL)	9.1298	3.17489	15.0847	1059
Rodentia	Bandicota indica	Overhunting (OH)	48.0856	2.5283	93.6565	1059
Rodentia	Bandicota indica	Habitat loss + Overhunting (COMB)	11.718	0.582432	22.8607	1059
Rodentia	Bandicota savilei	Baseline (Phylacine)	0	0	0	312
Rodentia	Bandicota savilei	Baseline (IUCN)	0	0	0	271
Rodentia	Bandicota savilei	Habitat loss (HL)	3.05851	1.06324	5.05379	271
Rodentia	Bandicota savilei	Overhunting (OH)	12.0542	0.712431	23.4103	271
Rodentia	Bandicota savilei	Habitat loss + Overhunting (COMB)	3.66041	0.219122	7.10751	271
Chiroptera	Barbastella leucomelas	Baseline (Phylacine)	0.0837682	0	0.173113	590
Chiroptera	Barbastella leucomelas	Baseline (IUCN)	0.0778623	0	0.160936	549
Chiroptera	Barbastella leucomelas	Habitat loss (HL)	0.0378252	0	0.0782063	549
Chiroptera	Barbastella leucomelas	Overhunting (OH)	0.200926	0	0.464355	549
Chiroptera	Barbastella leucomelas	Habitat loss + Overhunting (COMB)	0.073571	0	0.169734	549
Carnivora	Bassaricyon alleni	Baseline (Phylacine)	74.6961	0	223.823	2028
Carnivora	Bassaricyon alleni	Baseline (IUCN)	71.7453	0	214.984	1922
Carnivora	Bassaricyon alleni	Habitat loss (HL)	63.4267	0	190.087	1922
Carnivora	Bassaricyon alleni	Overhunting (OH)	90.9229	0	281.015	1922
Carnivora	Bassaricyon alleni	Habitat loss + Overhunting (COMB)	76.5882	0	236.542	1922
Carnivora	Bassaricyon gabbii	Baseline (Phylacine)	1.4388	0.573616	2.30399	95
Carnivora	Bassaricyon gabbii	Baseline (IUCN)	1.2681	0.505959	2.03024	83
Carnivora	Bassaricyon gabbii	Habitat loss (HL)	0.504164	0.201168	0.80716	83
Carnivora	Bassaricyon gabbii	Overhunting (OH)	1.6281	0.271591	2.9846	83
Carnivora	Bassaricyon gabbii	Habitat loss + Overhunting (COMB)	0.524759	0.0890073	0.960511	83
Carnivora	Bassaricyon medius	Baseline (Phylacine)	2.52737	0.98418	4.07056	124
Carnivora	Bassaricyon medius	Baseline (IUCN)	2.27244	0.885452	3.65942	107
Carnivora	Bassaricyon medius	Habitat loss (HL)	1.64025	0.638603	2.6419	107
Carnivora	Bassaricyon medius	Overhunting (OH)	2.63771	0.379832	4.90325	107
Carnivora	Bassaricyon medius	Habitat loss + Overhunting (COMB)	1.52495	0.23149	2.81997	107
Carnivora	Bassaricyon neblina	Baseline (Phylacine)	0.894136	0.346366	1.44191	125
Carnivora	Bassaricyon neblina	Baseline (IUCN)	0.850144	0.329318	1.37097	90
Carnivora	Bassaricyon neblina	Habitat loss (HL)	0.484246	0.187659	0.780833	90
Carnivora	Bassaricyon neblina	Overhunting (OH)	2.15482	0.172551	4.22249	90
Carnivora	Bassaricyon neblina	Habitat loss + Overhunting (COMB)	0.420761	0.0395906	0.808817	90
Carnivora	Bassariscus astutus	Baseline (Phylacine)	1.24924	0	4.45839	237
Carnivora	Bassariscus astutus	Baseline (IUCN)	1.18084	0	4.21415	225
Carnivora	Bassariscus astutus	Habitat loss (HL)	1.14375	0	4.08151	225
Carnivora	Bassariscus astutus	Overhunting (OH)	1.87232	0	6.82997	225
Carnivora	Bassariscus astutus	Habitat loss + Overhunting (COMB)	1.28978	0	4.70263	225
Carnivora	Bassariscus sumichrasti	Baseline (Phylacine)	4.01278	1.5674	6.45816	312
Carnivora	Bassariscus sumichrasti	Baseline (IUCN)	3.81326	1.48825	6.13827	293
Carnivora	Bassariscus sumichrasti	Habitat loss (HL)	1.96268	0.761841	3.16352	293
Carnivora	Bassariscus sumichrasti	Overhunting (OH)	4.81422	0.488825	9.20551	293
Carnivora	Bassariscus sumichrasti	Habitat loss + Overhunting (COMB)	2.10557	0.236074	3.99073	293
Rodentia	Batomys dentatus	Baseline (Phylacine)	0.158699	0.0469139	0.270483	3
Rodentia	Batomys dentatus	Baseline (IUCN)	0.188409	0.0555217	0.321296	3
Rodentia	Batomys dentatus	Habitat loss (HL)	0.107429	0.031621	0.183236	3
Rodentia	Batomys dentatus	Overhunting (OH)	0.264577	0.000196725	0.52902	3
Rodentia	Batomys dentatus	Habitat loss + Overhunting (COMB)	0.136725	7.56822e-05	0.273385	3
Rodentia	Batomys granti	Baseline (Phylacine)	0.0465472	0.0137486	0.0793457	14
Rodentia	Batomys granti	Baseline (IUCN)	0.0464143	0.0137082	0.0791204	8
Rodentia	Batomys granti	Habitat loss (HL)	0	0	0	8
Rodentia	Batomys granti	Overhunting (OH)	0.705541	0.00293035	1.4096	8
Rodentia	Batomys granti	Habitat loss + Overhunting (COMB)	0	0	0	8
Rodentia	Batomys russatus	Baseline (Phylacine)	0.0944639	0.0289666	0.159961	3
Rodentia	Batomys russatus	Baseline (IUCN)	0.00807825	0.00253364	0.0136229	1
Rodentia	Batomys russatus	Habitat loss (HL)	0.049144	0.0154134	0.0828746	1
Rodentia	Batomys russatus	Overhunting (OH)	0.11259	0.00151659	0.223664	1
Rodentia	Batomys russatus	Habitat loss + Overhunting (COMB)	0.0679263	0.000914967	0.134938	1
Rodentia	Batomys salomonseni	Baseline (Phylacine)	0.106892	0.0329893	0.180794	23
Rodentia	Batomys salomonseni	Baseline (IUCN)	0.0636578	0.0195287	0.107787	13
Rodentia	Batomys salomonseni	Habitat loss (HL)	0	0	0	13
Rodentia	Batomys salomonseni	Overhunting (OH)	1.32654	0.0199466	2.63313	13
Rodentia	Batomys salomonseni	Habitat loss + Overhunting (COMB)	0	0	0	13
Chiroptera	Bauerus dubiaquercus	Baseline (Phylacine)	0.0106744	0	0.0224035	150
Chiroptera	Bauerus dubiaquercus	Baseline (IUCN)	0.0108175	0	0.0227048	143
Chiroptera	Bauerus dubiaquercus	Habitat loss (HL)	0.00708313	0	0.0148756	143
Chiroptera	Bauerus dubiaquercus	Overhunting (OH)	0.0361347	0	0.082956	143
Chiroptera	Bauerus dubiaquercus	Habitat loss + Overhunting (COMB)	0.0122289	0	0.0280781	143
Carnivora	Bdeogale crassicauda	Baseline (Phylacine)	4.59933	1.69381	7.50485	565
Carnivora	Bdeogale crassicauda	Baseline (IUCN)	4.03459	1.48434	6.58484	502
Carnivora	Bdeogale crassicauda	Habitat loss (HL)	4.00737	1.47441	6.54033	502
Carnivora	Bdeogale crassicauda	Overhunting (OH)	5.20765	0.727961	9.69714	502
Carnivora	Bdeogale crassicauda	Habitat loss + Overhunting (COMB)	3.79643	0.539822	7.05654	502
Carnivora	Bdeogale jacksoni	Baseline (Phylacine)	0.165451	0.0655759	0.265325	25
Carnivora	Bdeogale jacksoni	Baseline (IUCN)	0.102283	0.0405894	0.163977	16
Carnivora	Bdeogale jacksoni	Habitat loss (HL)	0.0383471	0.0152293	0.0614649	16
Carnivora	Bdeogale jacksoni	Overhunting (OH)	0.114547	0.00635013	0.234119	16
Carnivora	Bdeogale jacksoni	Habitat loss + Overhunting (COMB)	0.0297981	0.00204833	0.0579453	16
Carnivora	Bdeogale nigripes	Baseline (Phylacine)	7.38424	2.78992	11.9786	999
Carnivora	Bdeogale nigripes	Baseline (IUCN)	6.92795	2.61716	11.2387	928
Carnivora	Bdeogale nigripes	Habitat loss (HL)	5.62346	2.11861	9.12831	928
Carnivora	Bdeogale nigripes	Overhunting (OH)	8.62925	1.40081	15.8715	928
Carnivora	Bdeogale nigripes	Habitat loss + Overhunting (COMB)	6.1127	0.991153	11.2404	928
Carnivora	Bdeogale omnivora	Baseline (Phylacine)	0.0656675	0.0252518	0.106083	11
Carnivora	Bdeogale omnivora	Baseline (IUCN)	0.015365	0.00590435	0.0248256	6
Carnivora	Bdeogale omnivora	Habitat loss (HL)	0.0358697	0.0137675	0.057972	6
Carnivora	Bdeogale omnivora	Overhunting (OH)	0.107519	0.00651648	0.211686	6
Carnivora	Bdeogale omnivora	Habitat loss + Overhunting (COMB)	0.0443525	0.00335338	0.0856154	6
Rodentia	Beamys hindei	Baseline (Phylacine)	4.97134	1.48662	8.45605	201
Rodentia	Beamys hindei	Baseline (IUCN)	3.72265	1.11474	6.33057	143
Rodentia	Beamys hindei	Habitat loss (HL)	1.3483	0.403503	2.29309	143
Rodentia	Beamys hindei	Overhunting (OH)	7.21583	0.313661	14.1185	143
Rodentia	Beamys hindei	Habitat loss + Overhunting (COMB)	2.08038	0.0939024	4.06685	143
Cetartiodactyla	Beatragus hunteri	Baseline (Phylacine)	0.533603	0	1.87026	3
Cetartiodactyla	Beatragus hunteri	Baseline (IUCN)	0.367056	0	1.28635	2
Cetartiodactyla	Beatragus hunteri	Habitat loss (HL)	0.0676213	0	0.236979	2
Cetartiodactyla	Beatragus hunteri	Overhunting (OH)	0.410259	0	1.47575	2
Cetartiodactyla	Beatragus hunteri	Habitat loss + Overhunting (COMB)	0.0738094	0	0.265504	2
Rodentia	Belomys pearsonii	Baseline (Phylacine)	7.95197	2.28094	13.623	865
Rodentia	Belomys pearsonii	Baseline (IUCN)	3.29105	0.946071	5.63602	301
Rodentia	Belomys pearsonii	Habitat loss (HL)	1.8525	0.531742	3.17326	301
Rodentia	Belomys pearsonii	Overhunting (OH)	8.83914	0.11065	17.575	301
Rodentia	Belomys pearsonii	Habitat loss + Overhunting (COMB)	2.28505	0.0301403	4.54256	301
Rodentia	Berylmys berdmorei	Baseline (Phylacine)	10.0771	3.07837	17.0758	285
Rodentia	Berylmys berdmorei	Baseline (IUCN)	8.78612	2.68379	14.8884	244
Rodentia	Berylmys berdmorei	Habitat loss (HL)	7.54328	2.30548	12.7811	244
Rodentia	Berylmys berdmorei	Overhunting (OH)	13.7611	0.443975	27.0943	244
Rodentia	Berylmys berdmorei	Habitat loss + Overhunting (COMB)	8.77008	0.269931	17.2739	244
Rodentia	Berylmys bowersi	Baseline (Phylacine)	64.3779	19.6011	109.155	1084
Rodentia	Berylmys bowersi	Baseline (IUCN)	61.6273	18.7521	104.502	1041
Rodentia	Berylmys bowersi	Habitat loss (HL)	61.6259	18.7517	104.5	1041
Rodentia	Berylmys bowersi	Overhunting (OH)	71.955	1.6046	142.345	1041
Rodentia	Berylmys bowersi	Habitat loss + Overhunting (COMB)	71.9532	1.60455	142.341	1041
Rodentia	Berylmys mackenziei	Baseline (Phylacine)	2.32916	0.702787	3.95553	259
Rodentia	Berylmys mackenziei	Baseline (IUCN)	0.777557	0.236648	1.31846	65
Rodentia	Berylmys mackenziei	Habitat loss (HL)	0.486621	0.148835	0.824408	65
Rodentia	Berylmys mackenziei	Overhunting (OH)	3.73492	0.129212	7.34062	65
Rodentia	Berylmys mackenziei	Habitat loss + Overhunting (COMB)	0.609062	0.0186569	1.19947	65
Rodentia	Berylmys manipulus	Baseline (Phylacine)	3.5552	1.0879	6.02251	128
Rodentia	Berylmys manipulus	Baseline (IUCN)	2.87891	0.876329	4.88149	107
Rodentia	Berylmys manipulus	Habitat loss (HL)	2.36562	0.717415	4.01383	107
Rodentia	Berylmys manipulus	Overhunting (OH)	5.42204	0.134548	10.7102	107
Rodentia	Berylmys manipulus	Habitat loss + Overhunting (COMB)	3.26229	0.0773488	6.44783	107
Rodentia	Bibimys chacoensis	Baseline (Phylacine)	4.23328e-06	0	1.07556e-05	27
Rodentia	Bibimys chacoensis	Baseline (IUCN)	4.63181e-06	0	1.17701e-05	26
Rodentia	Bibimys chacoensis	Habitat loss (HL)	0.00041045	0	0.00104103	26
Rodentia	Bibimys chacoensis	Overhunting (OH)	0.967029	0	2.60038	26
Rodentia	Bibimys chacoensis	Habitat loss + Overhunting (COMB)	0.000608238	0	0.00162642	26
Rodentia	Bibimys labiosus	Baseline (Phylacine)	4.50046	0	11.383	231
Rodentia	Bibimys labiosus	Baseline (IUCN)	3.78211	0	9.57019	191
Rodentia	Bibimys labiosus	Habitat loss (HL)	1.13079	0	2.86588	191
Rodentia	Bibimys labiosus	Overhunting (OH)	6.59298	0	17.6117	191
Rodentia	Bibimys labiosus	Habitat loss + Overhunting (COMB)	1.87598	0	5.01677	191
Rodentia	Bibimys torresi	Baseline (Phylacine)	0.00688757	0	0.0177932	3
Rodentia	Bibimys torresi	Baseline (IUCN)	0.023086	0	0.0595466	5
Rodentia	Bibimys torresi	Habitat loss (HL)	0.0407094	0	0.105116	5
Rodentia	Bibimys torresi	Overhunting (OH)	0.231064	0	0.627928	5
Rodentia	Bibimys torresi	Habitat loss + Overhunting (COMB)	0.0708925	0	0.192578	5
Rodentia	Biswamoyopterus biswasi	Baseline (Phylacine)	0.059825	0.018794	0.100856	10
Rodentia	Biswamoyopterus biswasi	Baseline (IUCN)	0.00219074	0.000704539	0.00367694	5
Rodentia	Biswamoyopterus biswasi	Habitat loss (HL)	0	0	0	5
Rodentia	Biswamoyopterus biswasi	Overhunting (OH)	0.276699	0.0141481	0.539249	5
Rodentia	Biswamoyopterus biswasi	Habitat loss + Overhunting (COMB)	0	0	0	5
Eulipotyphla	Blarinella griselda	Baseline (Phylacine)	0.0699251	0.00328933	0.136561	247
Eulipotyphla	Blarinella griselda	Baseline (IUCN)	0.0578284	0.00271271	0.112944	194
Eulipotyphla	Blarinella griselda	Habitat loss (HL)	0.0483645	0.00208236	0.0946467	194
Eulipotyphla	Blarinella griselda	Overhunting (OH)	1.38381	0	3.06362	194
Eulipotyphla	Blarinella griselda	Habitat loss + Overhunting (COMB)	0.0893285	0	0.197592	194
Eulipotyphla	Blarinella quadraticauda	Baseline (Phylacine)	0.0493227	0.00246143	0.0961841	32
Eulipotyphla	Blarinella quadraticauda	Baseline (IUCN)	0.0269626	0.00134364	0.0525816	18
Eulipotyphla	Blarinella quadraticauda	Habitat loss (HL)	0.0196716	0.000979363	0.0383639	18
Eulipotyphla	Blarinella quadraticauda	Overhunting (OH)	0.116936	0	0.258567	18
Eulipotyphla	Blarinella quadraticauda	Habitat loss + Overhunting (COMB)	0.0332788	0	0.0734714	18
Eulipotyphla	Blarinella wardi	Baseline (Phylacine)	0.121636	0.00619265	0.237079	85
Eulipotyphla	Blarinella wardi	Baseline (IUCN)	0.110756	0.00567899	0.215832	68
Eulipotyphla	Blarinella wardi	Habitat loss (HL)	0.0843827	0.00414694	0.164618	68
Eulipotyphla	Blarinella wardi	Overhunting (OH)	0.396135	0	0.876524	68
Eulipotyphla	Blarinella wardi	Habitat loss + Overhunting (COMB)	0.150144	0	0.332025	68
Rodentia	Blarinomys breviceps	Baseline (Phylacine)	12.1922	0	26.2484	238
Rodentia	Blarinomys breviceps	Baseline (IUCN)	10.5407	0	22.6917	205
Rodentia	Blarinomys breviceps	Habitat loss (HL)	3.58158	0	7.71214	205
Rodentia	Blarinomys breviceps	Overhunting (OH)	18.1556	0	42.2659	205
Rodentia	Blarinomys breviceps	Habitat loss + Overhunting (COMB)	5.68446	0	13.2242	205
Cetartiodactyla	Blastocerus dichotomus	Baseline (Phylacine)	1.94052	0	5.2776	1771
Cetartiodactyla	Blastocerus dichotomus	Baseline (IUCN)	1.81464	0	4.93531	1661
Cetartiodactyla	Blastocerus dichotomus	Habitat loss (HL)	0.727149	0	1.97602	319
Cetartiodactyla	Blastocerus dichotomus	Overhunting (OH)	68.9076	0	194.829	319
Cetartiodactyla	Blastocerus dichotomus	Habitat loss + Overhunting (COMB)	0.588766	0	1.66541	319
Cetartiodactyla	Bos gaurus	Baseline (Phylacine)	878.639	241.098	1516.18	935
Cetartiodactyla	Bos gaurus	Baseline (IUCN)	638.275	174.56	1101.99	674
Cetartiodactyla	Bos gaurus	Habitat loss (HL)	487.439	133.011	841.867	674
Cetartiodactyla	Bos gaurus	Overhunting (OH)	248.691	9.75799	514.686	674
Cetartiodactyla	Bos gaurus	Habitat loss + Overhunting (COMB)	181.069	6.64368	373.763	674
Cetartiodactyla	Bos javanicus	Baseline (Phylacine)	223.482	0	790.774	1134
Cetartiodactyla	Bos javanicus	Baseline (IUCN)	35.0901	0	124.185	171
Cetartiodactyla	Bos javanicus	Habitat loss (HL)	23.5969	0	83.506	163
Cetartiodactyla	Bos javanicus	Overhunting (OH)	16.7594	0	61.3942	163
Cetartiodactyla	Bos javanicus	Habitat loss + Overhunting (COMB)	12.4344	0	45.3945	163
Cetartiodactyla	Boselaphus tragocamelus	Baseline (Phylacine)	571.226	164.296	978.156	170
Cetartiodactyla	Boselaphus tragocamelus	Baseline (IUCN)	438.965	126.472	751.458	133
Cetartiodactyla	Boselaphus tragocamelus	Habitat loss (HL)	379.594	109.622	649.565	133
Cetartiodactyla	Boselaphus tragocamelus	Overhunting (OH)	315.843	6.99093	631	133
Cetartiodactyla	Boselaphus tragocamelus	Habitat loss + Overhunting (COMB)	232.041	5.25798	462.968	133
Rodentia	Brachiones przewalskii	Baseline (Phylacine)	0	0	0	2
Rodentia	Brachiones przewalskii	Baseline (IUCN)	0	0	0	1
Rodentia	Brachiones przewalskii	Habitat loss (HL)	0	0	0	1
Rodentia	Brachiones przewalskii	Overhunting (OH)	0.0785547	0	0.15828	1
Rodentia	Brachiones przewalskii	Habitat loss + Overhunting (COMB)	0	0	0	1
Chiroptera	Brachyphylla cavernarum	Baseline (Phylacine)	0.00248328	0	0.00522986	3
Chiroptera	Brachyphylla cavernarum	Baseline (IUCN)	0.00248328	0	0.00522986	3
Chiroptera	Brachyphylla cavernarum	Habitat loss (HL)	0.00110746	0	0.00233241	3
Chiroptera	Brachyphylla cavernarum	Overhunting (OH)	0.0044757	0	0.0106241	3
Chiroptera	Brachyphylla cavernarum	Habitat loss + Overhunting (COMB)	0.00155102	0	0.00368247	3
Rodentia	Brachytarsomys albicauda	Baseline (Phylacine)	1.46557	0.491787	2.43936	58
Rodentia	Brachytarsomys albicauda	Baseline (IUCN)	1.12672	0.377885	1.87555	38
Rodentia	Brachytarsomys albicauda	Habitat loss (HL)	0.650909	0.218589	1.08323	38
Rodentia	Brachytarsomys albicauda	Overhunting (OH)	2.21165	0.145835	4.27747	38
Rodentia	Brachytarsomys albicauda	Habitat loss + Overhunting (COMB)	0.686348	0.0445194	1.32818	38
Rodentia	Brachytarsomys villosa	Baseline (Phylacine)	0.0685366	0.0271383	0.109935	19
Rodentia	Brachytarsomys villosa	Baseline (IUCN)	0.0689808	0.0273156	0.110646	11
Rodentia	Brachytarsomys villosa	Habitat loss (HL)	0.079101	0.0312925	0.12691	11
Rodentia	Brachytarsomys villosa	Overhunting (OH)	0.448503	0.046902	0.850104	11
Rodentia	Brachytarsomys villosa	Habitat loss + Overhunting (COMB)	0.0779351	0.00791	0.14796	11
Primates	Brachyteles arachnoides	Baseline (Phylacine)	88.1148	0	387.829	59
Primates	Brachyteles arachnoides	Baseline (IUCN)	61.7473	0	271.749	43
Primates	Brachyteles arachnoides	Habitat loss (HL)	27.7793	0	122.234	43
Primates	Brachyteles arachnoides	Overhunting (OH)	52.0153	0	232.003	43
Primates	Brachyteles arachnoides	Habitat loss + Overhunting (COMB)	19.9956	0	89.0983	43
Primates	Brachyteles hypoxanthus	Baseline (Phylacine)	85.0658	0	271.831	88
Primates	Brachyteles hypoxanthus	Baseline (IUCN)	47.3365	0	151.232	50
Primates	Brachyteles hypoxanthus	Habitat loss (HL)	16.7842	0	53.6185	50
Primates	Brachyteles hypoxanthus	Overhunting (OH)	30.1087	0	100.47	50
Primates	Brachyteles hypoxanthus	Habitat loss + Overhunting (COMB)	8.48209	0	28.3288	50
Rodentia	Brachyuromys betsileoensis	Baseline (Phylacine)	0.000327994	0.000109674	0.000546315	52
Rodentia	Brachyuromys betsileoensis	Baseline (IUCN)	0.000323771	0.000108266	0.000539277	24
Rodentia	Brachyuromys betsileoensis	Habitat loss (HL)	0	0	0	24
Rodentia	Brachyuromys betsileoensis	Overhunting (OH)	0.439626	0.0261998	0.853053	24
Rodentia	Brachyuromys betsileoensis	Habitat loss + Overhunting (COMB)	0	0	0	24
Rodentia	Brachyuromys ramirohitra	Baseline (Phylacine)	0.190976	0.0636196	0.318333	61
Rodentia	Brachyuromys ramirohitra	Baseline (IUCN)	0.160486	0.0535208	0.26745	40
Rodentia	Brachyuromys ramirohitra	Habitat loss (HL)	0.164276	0.0545418	0.274011	40
Rodentia	Brachyuromys ramirohitra	Overhunting (OH)	0.715883	0.0423584	1.38941	40
Rodentia	Brachyuromys ramirohitra	Habitat loss + Overhunting (COMB)	0.189685	0.0109231	0.368447	40
Pilosa	Bradypus torquatus	Baseline (Phylacine)	6.13524	2.37759	9.89289	71
Pilosa	Bradypus torquatus	Baseline (IUCN)	3.94124	1.52277	6.35972	44
Pilosa	Bradypus torquatus	Habitat loss (HL)	3.94124	1.52277	6.35972	44
Pilosa	Bradypus torquatus	Overhunting (OH)	3.38192	0.272106	6.52225	44
Pilosa	Bradypus torquatus	Habitat loss + Overhunting (COMB)	3.38192	0.272106	6.52225	44
Pilosa	Bradypus tridactylus	Baseline (Phylacine)	88.1737	0	329.675	514
Pilosa	Bradypus tridactylus	Baseline (IUCN)	79.1499	0	295.927	464
Pilosa	Bradypus tridactylus	Habitat loss (HL)	70.3071	0	262.845	464
Pilosa	Bradypus tridactylus	Overhunting (OH)	105.671	0	401.907	464
Pilosa	Bradypus tridactylus	Habitat loss + Overhunting (COMB)	89.894	0	341.796	464
Pilosa	Bradypus variegatus	Baseline (Phylacine)	746.575	0	1775.43	3984
Pilosa	Bradypus variegatus	Baseline (IUCN)	716.128	0	1703.03	3848
Pilosa	Bradypus variegatus	Habitat loss (HL)	642.058	0	1526.99	3848
Pilosa	Bradypus variegatus	Overhunting (OH)	1180.03	0	2943.76	3848
Pilosa	Bradypus variegatus	Habitat loss + Overhunting (COMB)	782.749	0	1950.88	3848
Rodentia	Brucepattersonius albinasus	Baseline (Phylacine)	0.000875409	0	0.00192686	3
Rodentia	Brucepattersonius albinasus	Baseline (IUCN)	0.00484341	0	0.0106728	28
Rodentia	Brucepattersonius albinasus	Habitat loss (HL)	0	0	0	28
Rodentia	Brucepattersonius albinasus	Overhunting (OH)	1.16138	0	2.76748	28
Rodentia	Brucepattersonius albinasus	Habitat loss + Overhunting (COMB)	0	0	0	28
Rodentia	Brucepattersonius griserufescens	Baseline (Phylacine)	0.000916569	0	0.00201754	24
Rodentia	Brucepattersonius griserufescens	Baseline (IUCN)	0.00484341	0	0.0106728	28
Rodentia	Brucepattersonius griserufescens	Habitat loss (HL)	0	0	0	28
Rodentia	Brucepattersonius griserufescens	Overhunting (OH)	1.16138	0	2.76748	28
Rodentia	Brucepattersonius griserufescens	Habitat loss + Overhunting (COMB)	0	0	0	28
Rodentia	Brucepattersonius guarani	Baseline (Phylacine)	0.0842553	0	0.18423	3
Rodentia	Brucepattersonius guarani	Baseline (IUCN)	0.342879	0	0.749702	12
Rodentia	Brucepattersonius guarani	Habitat loss (HL)	0.163225	0	0.356941	12
Rodentia	Brucepattersonius guarani	Overhunting (OH)	0.598847	0	1.41176	12
Rodentia	Brucepattersonius guarani	Habitat loss + Overhunting (COMB)	0.286844	0	0.677041	12
Rodentia	Brucepattersonius igniventris	Baseline (Phylacine)	0.458324	0	0.99819	17
Rodentia	Brucepattersonius igniventris	Baseline (IUCN)	0.329312	0	0.717538	13
Rodentia	Brucepattersonius igniventris	Habitat loss (HL)	0.180809	0	0.394109	13
Rodentia	Brucepattersonius igniventris	Overhunting (OH)	0.514927	0	1.2098	13
Rodentia	Brucepattersonius igniventris	Habitat loss + Overhunting (COMB)	0.281579	0	0.659351	13
Rodentia	Brucepattersonius iheringi	Baseline (Phylacine)	3.25701	0	7.09718	97
Rodentia	Brucepattersonius iheringi	Baseline (IUCN)	2.49401	0	5.43589	73
Rodentia	Brucepattersonius iheringi	Habitat loss (HL)	1.78284	0	3.8842	73
Rodentia	Brucepattersonius iheringi	Overhunting (OH)	4.31277	0	10.1268	73
Rodentia	Brucepattersonius iheringi	Habitat loss + Overhunting (COMB)	2.92542	0	6.86796	73
Rodentia	Brucepattersonius misionensis	Baseline (Phylacine)	0.0915656	0	0.199175	3
Rodentia	Brucepattersonius misionensis	Baseline (IUCN)	0.333702	0	0.725878	11
Rodentia	Brucepattersonius misionensis	Habitat loss (HL)	0.176986	0	0.385014	11
Rodentia	Brucepattersonius misionensis	Overhunting (OH)	0.558122	0	1.30844	11
Rodentia	Brucepattersonius misionensis	Habitat loss + Overhunting (COMB)	0.296318	0	0.69569	11
Rodentia	Brucepattersonius paradisus	Baseline (Phylacine)	0.189379	0	0.412003	6
Rodentia	Brucepattersonius paradisus	Baseline (IUCN)	0.429736	0	0.93466	14
Rodentia	Brucepattersonius paradisus	Habitat loss (HL)	0.209117	0	0.454859	14
Rodentia	Brucepattersonius paradisus	Overhunting (OH)	0.717744	0	1.68345	14
Rodentia	Brucepattersonius paradisus	Habitat loss + Overhunting (COMB)	0.35073	0	0.823507	14
Rodentia	Brucepattersonius soricinus	Baseline (Phylacine)	0.359736	0	0.783544	14
Rodentia	Brucepattersonius soricinus	Baseline (IUCN)	1.56219	0	3.40265	59
Rodentia	Brucepattersonius soricinus	Habitat loss (HL)	0.712653	0	1.55248	59
Rodentia	Brucepattersonius soricinus	Overhunting (OH)	2.51278	0	5.91938	59
Rodentia	Brucepattersonius soricinus	Habitat loss + Overhunting (COMB)	1.1175	0	2.62612	59
Cetartiodactyla	Bubalus arnee	Baseline (Phylacine)	674.704	182.952	1166.46	733
Cetartiodactyla	Bubalus arnee	Baseline (IUCN)	24.547	6.64014	42.4538	26
Cetartiodactyla	Bubalus arnee	Habitat loss (HL)	18.929	5.1255	32.7325	26
Cetartiodactyla	Bubalus arnee	Overhunting (OH)	13.9214	0.107618	28.3536	26
Cetartiodactyla	Bubalus arnee	Habitat loss + Overhunting (COMB)	9.18436	0.0674812	18.8017	26
Cetartiodactyla	Bubalus depressicornis	Baseline (Phylacine)	17.4061	6.8955	27.9167	70
Cetartiodactyla	Bubalus depressicornis	Baseline (IUCN)	14.7381	5.82237	23.6539	61
Cetartiodactyla	Bubalus depressicornis	Habitat loss (HL)	9.18913	3.62548	14.7528	60
Cetartiodactyla	Bubalus depressicornis	Overhunting (OH)	13.3386	2.05395	24.6592	60
Cetartiodactyla	Bubalus depressicornis	Habitat loss + Overhunting (COMB)	5.4058	0.885386	9.93121	60
Cetartiodactyla	Bubalus mindorensis	Baseline (Phylacine)	0.675974	0.258323	1.09363	3
Cetartiodactyla	Bubalus mindorensis	Baseline (IUCN)	0.442608	0.169598	0.715618	2
Cetartiodactyla	Bubalus mindorensis	Habitat loss (HL)	0.0569465	0.0218332	0.0920599	2
Cetartiodactyla	Bubalus mindorensis	Overhunting (OH)	0.548278	0.0326426	1.06391	2
Cetartiodactyla	Bubalus mindorensis	Habitat loss + Overhunting (COMB)	0.0318323	0.00232553	0.0613392	2
Cetartiodactyla	Bubalus quarlesi	Baseline (Phylacine)	15.261	6.16524	24.3567	52
Cetartiodactyla	Bubalus quarlesi	Baseline (IUCN)	13.266	5.35085	21.1812	45
Cetartiodactyla	Bubalus quarlesi	Habitat loss (HL)	9.95303	4.0063	15.8998	45
Cetartiodactyla	Bubalus quarlesi	Overhunting (OH)	8.63762	0.889355	16.4772	45
Cetartiodactyla	Bubalus quarlesi	Habitat loss + Overhunting (COMB)	5.96486	0.674821	11.2651	45
Cetartiodactyla	Budorcas taxicolor	Baseline (Phylacine)	91.6934	34.0221	149.365	258
Cetartiodactyla	Budorcas taxicolor	Baseline (IUCN)	79.1849	29.4021	128.968	204
Cetartiodactyla	Budorcas taxicolor	Habitat loss (HL)	66.3826	24.5848	108.18	204
Cetartiodactyla	Budorcas taxicolor	Overhunting (OH)	83.5823	5.39355	162.98	204
Cetartiodactyla	Budorcas taxicolor	Habitat loss + Overhunting (COMB)	48.0603	3.29224	93.0711	204
Rodentia	Bullimus bagobus	Baseline (Phylacine)	1.26621	0.407231	2.12518	45
Rodentia	Bullimus bagobus	Baseline (IUCN)	1.23314	0.396458	2.06982	43
Rodentia	Bullimus bagobus	Habitat loss (HL)	0.857381	0.273574	1.44119	43
Rodentia	Bullimus bagobus	Overhunting (OH)	3.4497	0.0970825	6.80232	43
Rodentia	Bullimus bagobus	Habitat loss + Overhunting (COMB)	1.02154	0.0299931	2.01308	43
Rodentia	Bullimus luzonicus	Baseline (Phylacine)	0.747828	0.229335	1.26632	27
Rodentia	Bullimus luzonicus	Baseline (IUCN)	0.619634	0.189647	1.04962	22
Rodentia	Bullimus luzonicus	Habitat loss (HL)	0.664203	0.203103	1.1253	22
Rodentia	Bullimus luzonicus	Overhunting (OH)	1.64034	0.0337672	3.2469	22
Rodentia	Bullimus luzonicus	Habitat loss + Overhunting (COMB)	0.809484	0.0180507	1.60092	22
Rodentia	Bunomys andrewsi	Baseline (Phylacine)	0.72528	0.26341	1.18715	49
Rodentia	Bunomys andrewsi	Baseline (IUCN)	0.693993	0.252134	1.13585	47
Rodentia	Bunomys andrewsi	Habitat loss (HL)	0.560708	0.203043	0.918373	47
Rodentia	Bunomys andrewsi	Overhunting (OH)	1.50287	0.109249	2.89649	47
Rodentia	Bunomys andrewsi	Habitat loss + Overhunting (COMB)	0.844867	0.0637585	1.62598	47
Rodentia	Bunomys chrysocomus	Baseline (Phylacine)	0.729826	0.263925	1.19573	68
Rodentia	Bunomys chrysocomus	Baseline (IUCN)	0.732876	0.265046	1.20071	68
Rodentia	Bunomys chrysocomus	Habitat loss (HL)	0.712943	0.257852	1.16803	68
Rodentia	Bunomys chrysocomus	Overhunting (OH)	2.14289	0.158148	4.12763	68
Rodentia	Bunomys chrysocomus	Habitat loss + Overhunting (COMB)	1.07274	0.0811705	2.0643	68
Rodentia	Bunomys coelestis	Baseline (Phylacine)	0	0	0	1
Rodentia	Bunomys coelestis	Baseline (IUCN)	0.000814845	0.000301858	0.00132783	2
Rodentia	Bunomys coelestis	Habitat loss (HL)	0	0	0	2
Rodentia	Bunomys coelestis	Overhunting (OH)	0.072039	0.00436517	0.139713	2
Rodentia	Bunomys coelestis	Habitat loss + Overhunting (COMB)	0	0	0	2
Rodentia	Bunomys fratrorum	Baseline (Phylacine)	0.0885432	0.0315209	0.145566	6
Rodentia	Bunomys fratrorum	Baseline (IUCN)	0.0706135	0.0252264	0.116001	5
Rodentia	Bunomys fratrorum	Habitat loss (HL)	0.0454011	0.0162745	0.0745277	5
Rodentia	Bunomys fratrorum	Overhunting (OH)	0.152385	0.0110842	0.293685	5
Rodentia	Bunomys fratrorum	Habitat loss + Overhunting (COMB)	0.0661161	0.0045547	0.127677	5
Rodentia	Bunomys penitus	Baseline (Phylacine)	0.133534	0.0477082	0.21936	27
Rodentia	Bunomys penitus	Baseline (IUCN)	0.0740376	0.0264968	0.121578	12
Rodentia	Bunomys penitus	Habitat loss (HL)	0.0772013	0.0274273	0.126975	12
Rodentia	Bunomys penitus	Overhunting (OH)	0.366138	0.0277438	0.704532	12
Rodentia	Bunomys penitus	Habitat loss + Overhunting (COMB)	0.103618	0.00765221	0.199584	12
Rodentia	Bunomys prolatus	Baseline (Phylacine)	0.0479336	0.0172238	0.0786433	3
Rodentia	Bunomys prolatus	Baseline (IUCN)	0.0155354	0.00556531	0.0255055	1
Rodentia	Bunomys prolatus	Habitat loss (HL)	0.0198843	0.00712323	0.0326454	1
Rodentia	Bunomys prolatus	Overhunting (OH)	0.028313	0.00215072	0.0544752	1
Rodentia	Bunomys prolatus	Habitat loss + Overhunting (COMB)	0.028313	0.00215072	0.0544752	1
Cingulata	Cabassous centralis	Baseline (Phylacine)	4.59323	1.00548	8.18098	386
Cingulata	Cabassous centralis	Baseline (IUCN)	3.9761	0.867572	7.08463	339
Cingulata	Cabassous centralis	Habitat loss (HL)	3.01688	0.660108	5.37365	339
Cingulata	Cabassous centralis	Overhunting (OH)	4.10911	0.0594425	8.2986	339
Cingulata	Cabassous centralis	Habitat loss + Overhunting (COMB)	2.79959	0.0413759	5.64825	339
Cingulata	Cabassous chacoensis	Baseline (Phylacine)	2.58838	0.599158	4.5776	193
Cingulata	Cabassous chacoensis	Baseline (IUCN)	2.31538	0.537556	4.0932	172
Cingulata	Cabassous chacoensis	Habitat loss (HL)	2.09331	0.486933	3.69968	172
Cingulata	Cabassous chacoensis	Overhunting (OH)	3.52376	0.00406921	7.06525	172
Cingulata	Cabassous chacoensis	Habitat loss + Overhunting (COMB)	3.1714	0.00358583	6.35843	172
Cingulata	Cabassous tatouay	Baseline (Phylacine)	31.4484	0	70.1908	1010
Cingulata	Cabassous tatouay	Baseline (IUCN)	30.3677	0	67.7827	975
Cingulata	Cabassous tatouay	Habitat loss (HL)	22.3549	0	49.8978	975
Cingulata	Cabassous tatouay	Overhunting (OH)	44.9887	0	107.743	975
Cingulata	Cabassous tatouay	Habitat loss + Overhunting (COMB)	20.7515	0	49.8216	975
Cingulata	Cabassous unicinctus	Baseline (Phylacine)	49.7911	11.034	88.5483	4100
Cingulata	Cabassous unicinctus	Baseline (IUCN)	47.7812	10.581	84.9813	3961
Cingulata	Cabassous unicinctus	Habitat loss (HL)	47.7809	10.581	84.9809	3961
Cingulata	Cabassous unicinctus	Overhunting (OH)	52.2962	1.76215	103.385	3961
Cingulata	Cabassous unicinctus	Habitat loss + Overhunting (COMB)	52.296	1.76214	103.385	3961
Primates	Cacajao calvus	Baseline (Phylacine)	117.922	0	263.454	284
Primates	Cacajao calvus	Baseline (IUCN)	62.561	0	139.813	151
Primates	Cacajao calvus	Habitat loss (HL)	62.561	0	139.813	151
Primates	Cacajao calvus	Overhunting (OH)	47.7168	0	110.761	151
Primates	Cacajao calvus	Habitat loss + Overhunting (COMB)	47.7168	0	110.761	151
Primates	Cacajao hosomi	Baseline (Phylacine)	6.60685	1.37059	11.8431	62
Primates	Cacajao hosomi	Baseline (IUCN)	4.73227	0.982157	8.48238	44
Primates	Cacajao hosomi	Habitat loss (HL)	4.7741	0.990848	8.55735	44
Primates	Cacajao hosomi	Overhunting (OH)	5.3409	0.0445886	10.6559	44
Primates	Cacajao hosomi	Habitat loss + Overhunting (COMB)	5.3083	0.0442741	10.591	44
Paucituberculata	Caenolestes caniventer	Baseline (Phylacine)	0.129761	0.0443626	0.215159	45
Paucituberculata	Caenolestes caniventer	Baseline (IUCN)	0.100069	0.0343014	0.165836	27
Paucituberculata	Caenolestes caniventer	Habitat loss (HL)	0.0453212	0.0154901	0.0751523	27
Paucituberculata	Caenolestes caniventer	Overhunting (OH)	0.436378	0.0275102	0.845246	27
Paucituberculata	Caenolestes caniventer	Habitat loss + Overhunting (COMB)	0.0675005	0.00509675	0.129904	27
Paucituberculata	Caenolestes condorensis	Baseline (Phylacine)	0.046995	0.0165319	0.077458	4
Paucituberculata	Caenolestes condorensis	Baseline (IUCN)	0.0114714	0.00397652	0.0189663	1
Paucituberculata	Caenolestes condorensis	Habitat loss (HL)	0.0114726	0.00397692	0.0189682	1
Paucituberculata	Caenolestes condorensis	Overhunting (OH)	0.017719	0.00171837	0.0337195	1
Paucituberculata	Caenolestes condorensis	Habitat loss + Overhunting (COMB)	0.017719	0.00171837	0.0337195	1
Paucituberculata	Caenolestes convelatus	Baseline (Phylacine)	0.338888	0.11438	0.563396	75
Paucituberculata	Caenolestes convelatus	Baseline (IUCN)	0.135808	0.0457961	0.22582	25
Paucituberculata	Caenolestes convelatus	Habitat loss (HL)	0.082222	0.0277817	0.136662	25
Paucituberculata	Caenolestes convelatus	Overhunting (OH)	0.36291	0.0211123	0.704707	25
Paucituberculata	Caenolestes convelatus	Habitat loss + Overhunting (COMB)	0.1165	0.00670257	0.226297	25
Paucituberculata	Caenolestes fuliginosus	Baseline (Phylacine)	0.529644	0.167415	0.891873	174
Paucituberculata	Caenolestes fuliginosus	Baseline (IUCN)	0.481123	0.152227	0.81002	133
Paucituberculata	Caenolestes fuliginosus	Habitat loss (HL)	0.269884	0.0854552	0.454313	133
Paucituberculata	Caenolestes fuliginosus	Overhunting (OH)	1.88876	0.0656787	3.71238	133
Paucituberculata	Caenolestes fuliginosus	Habitat loss + Overhunting (COMB)	0.401774	0.0173374	0.786211	133
Paucituberculata	Caenolestes sangay	Baseline (Phylacine)	0.175476	0.0595536	0.291398	24
Paucituberculata	Caenolestes sangay	Baseline (IUCN)	0.0489385	0.0166735	0.0812035	6
Paucituberculata	Caenolestes sangay	Habitat loss (HL)	0.0439244	0.0149564	0.0728923	6
Paucituberculata	Caenolestes sangay	Overhunting (OH)	0.0931938	0.00728026	0.179107	6
Paucituberculata	Caenolestes sangay	Habitat loss + Overhunting (COMB)	0.066713	0.00519054	0.128235	6
Afrosoricida	Calcochloris obtusirostris	Baseline (Phylacine)	4.69101	0	18.1137	68
Afrosoricida	Calcochloris obtusirostris	Baseline (IUCN)	3.71404	0	14.3408	54
Afrosoricida	Calcochloris obtusirostris	Habitat loss (HL)	4.04639	0	15.6236	54
Afrosoricida	Calcochloris obtusirostris	Overhunting (OH)	8.07892	0	31.9599	54
Afrosoricida	Calcochloris obtusirostris	Habitat loss + Overhunting (COMB)	7.88578	0	31.1968	54
Primates	Callicebus aureipalatii	Baseline (Phylacine)	2.44057	0.47124	4.40989	24
Primates	Callicebus aureipalatii	Baseline (IUCN)	4.60284	0.886178	8.3195	41
Primates	Callicebus aureipalatii	Habitat loss (HL)	3.31343	0.637396	5.98946	41
Primates	Callicebus aureipalatii	Overhunting (OH)	4.85691	0.00051021	9.76538	41
Primates	Callicebus aureipalatii	Habitat loss + Overhunting (COMB)	2.97373	0.00051021	5.98227	41
Primates	Callicebus baptista	Baseline (Phylacine)	6.12324	0.633678	11.6128	39
Primates	Callicebus baptista	Baseline (IUCN)	2.41858	0.25096	4.5862	16
Primates	Callicebus baptista	Habitat loss (HL)	2.28043	0.236636	4.32423	16
Primates	Callicebus baptista	Overhunting (OH)	3.34636	0	6.92465	16
Primates	Callicebus baptista	Habitat loss + Overhunting (COMB)	2.51464	0	5.20297	16
Primates	Callicebus barbarabrownae	Baseline (Phylacine)	9.07742	0.883851	17.271	70
Primates	Callicebus barbarabrownae	Baseline (IUCN)	5.65176	0.546394	10.7571	38
Primates	Callicebus barbarabrownae	Habitat loss (HL)	4.73914	0.459226	9.01905	38
Primates	Callicebus barbarabrownae	Overhunting (OH)	6.26311	0	13.0247	38
Primates	Callicebus barbarabrownae	Habitat loss + Overhunting (COMB)	4.90534	0	10.1961	38
Primates	Callicebus bernhardi	Baseline (Phylacine)	7.13563	0.729661	13.5416	93
Primates	Callicebus bernhardi	Baseline (IUCN)	6.01045	0.614673	11.4062	78
Primates	Callicebus bernhardi	Habitat loss (HL)	4.95809	0.507476	9.4087	78
Primates	Callicebus bernhardi	Overhunting (OH)	7.62359	0	15.7881	78
Primates	Callicebus bernhardi	Habitat loss + Overhunting (COMB)	6.27928	0	12.9996	78
Primates	Callicebus brunneus	Baseline (Phylacine)	20.8397	0	76.5638	195
Primates	Callicebus brunneus	Baseline (IUCN)	10.7394	0	39.4502	100
Primates	Callicebus brunneus	Habitat loss (HL)	7.06348	0	25.948	100
Primates	Callicebus brunneus	Overhunting (OH)	10.7174	0	39.7478	100
Primates	Callicebus brunneus	Habitat loss + Overhunting (COMB)	7.02451	0	26.0513	100
Primates	Callicebus caligatus	Baseline (Phylacine)	4.95573	0.53109	9.38037	60
Primates	Callicebus caligatus	Baseline (IUCN)	3.91725	0.420532	7.41397	47
Primates	Callicebus caligatus	Habitat loss (HL)	3.80583	0.408434	7.20322	47
Primates	Callicebus caligatus	Overhunting (OH)	5.22047	0	10.7839	47
Primates	Callicebus caligatus	Habitat loss + Overhunting (COMB)	4.62304	0	9.54988	47
Primates	Callicebus caquetensis	Baseline (Phylacine)	0.0252332	0.00488522	0.0455812	4
Primates	Callicebus caquetensis	Baseline (IUCN)	0.0183867	0.00355384	0.0332195	3
Primates	Callicebus caquetensis	Habitat loss (HL)	0	0	0	3
Primates	Callicebus caquetensis	Overhunting (OH)	0.360936	0	0.741611	3
Primates	Callicebus caquetensis	Habitat loss + Overhunting (COMB)	0	0	0	3
Primates	Callicebus cinerascens	Baseline (Phylacine)	13.5621	2.51307	24.6111	135
Primates	Callicebus cinerascens	Baseline (IUCN)	11.7567	2.17867	21.3347	118
Primates	Callicebus cinerascens	Habitat loss (HL)	11.3438	2.10329	20.5844	118
Primates	Callicebus cinerascens	Overhunting (OH)	15.5215	0.0146441	31.0865	118
Primates	Callicebus cinerascens	Habitat loss + Overhunting (COMB)	14.7864	0.0141761	29.6145	118
Primates	Callicebus coimbrai	Baseline (Phylacine)	1.86472	0.384624	3.34482	8
Primates	Callicebus coimbrai	Baseline (IUCN)	1.49947	0.311447	2.68749	6
Primates	Callicebus coimbrai	Habitat loss (HL)	0.198592	0.0414932	0.35569	6
Primates	Callicebus coimbrai	Overhunting (OH)	1.43754	0	2.89197	6
Primates	Callicebus coimbrai	Habitat loss + Overhunting (COMB)	0.172342	0	0.346378	6
Primates	Callicebus cupreus	Baseline (Phylacine)	14.1438	0.141089	28.1466	431
Primates	Callicebus cupreus	Baseline (IUCN)	11.7036	0.117957	23.2892	361
Primates	Callicebus cupreus	Habitat loss (HL)	11.6562	0.117525	23.1949	361
Primates	Callicebus cupreus	Overhunting (OH)	26.0468	0	53.6702	361
Primates	Callicebus cupreus	Habitat loss + Overhunting (COMB)	25.3073	0	52.147	361
Primates	Callicebus discolor	Baseline (Phylacine)	4.66481	0	11.7456	146
Primates	Callicebus discolor	Baseline (IUCN)	6.47079	0	16.2991	194
Primates	Callicebus discolor	Habitat loss (HL)	6.076	0	15.3025	194
Primates	Callicebus discolor	Overhunting (OH)	18.8088	0	48.3512	194
Primates	Callicebus discolor	Habitat loss + Overhunting (COMB)	10.036	0	25.7802	194
Primates	Callicebus donacophilus	Baseline (Phylacine)	16.74	3.46376	30.0163	127
Primates	Callicebus donacophilus	Baseline (IUCN)	12.6762	2.62292	22.7295	94
Primates	Callicebus donacophilus	Habitat loss (HL)	6.93375	1.43678	12.4307	94
Primates	Callicebus donacophilus	Overhunting (OH)	12.8135	0.0621923	25.6338	94
Primates	Callicebus donacophilus	Habitat loss + Overhunting (COMB)	6.64499	0.033954	13.2752	94
Primates	Callicebus dubius	Baseline (Phylacine)	10.4586	0	29.4729	95
Primates	Callicebus dubius	Baseline (IUCN)	8.55524	0	24.1091	78
Primates	Callicebus dubius	Habitat loss (HL)	7.69447	0	21.6833	78
Primates	Callicebus dubius	Overhunting (OH)	10.4354	0	30.3656	78
Primates	Callicebus dubius	Habitat loss + Overhunting (COMB)	9.39598	0	27.3403	78
Primates	Callicebus hoffmannsi	Baseline (Phylacine)	10.5811	0	38.4101	75
Primates	Callicebus hoffmannsi	Baseline (IUCN)	8.3782	0	30.4164	59
Primates	Callicebus hoffmannsi	Habitat loss (HL)	8.4252	0	30.5881	59
Primates	Callicebus hoffmannsi	Overhunting (OH)	11.5091	0	42.4557	59
Primates	Callicebus hoffmannsi	Habitat loss + Overhunting (COMB)	10.2276	0	37.726	59
Primates	Callicebus lucifer	Baseline (Phylacine)	14.1697	0	40.0447	169
Primates	Callicebus lucifer	Baseline (IUCN)	12.6273	0	35.684	152
Primates	Callicebus lucifer	Habitat loss (HL)	12.7195	0	35.9446	152
Primates	Callicebus lucifer	Overhunting (OH)	13.5117	0	39.4587	152
Primates	Callicebus lucifer	Habitat loss + Overhunting (COMB)	13.027	0	38.044	152
Primates	Callicebus lugens	Baseline (Phylacine)	32.5836	0	78.7445	513
Primates	Callicebus lugens	Baseline (IUCN)	34.3064	0	82.872	549
Primates	Callicebus lugens	Habitat loss (HL)	29.4894	0	71.1849	549
Primates	Callicebus lugens	Overhunting (OH)	42.0509	0	106.775	549
Primates	Callicebus lugens	Habitat loss + Overhunting (COMB)	34.1518	0	86.6109	549
Primates	Callicebus medemi	Baseline (Phylacine)	4.04813	0.888852	7.20742	32
Primates	Callicebus medemi	Baseline (IUCN)	2.22118	0.488326	3.95403	14
Primates	Callicebus medemi	Habitat loss (HL)	2.13106	0.46819	3.79394	14
Primates	Callicebus medemi	Overhunting (OH)	2.06983	0.0146878	4.13752	14
Primates	Callicebus medemi	Habitat loss + Overhunting (COMB)	1.87856	0.0146878	3.75375	14
Primates	Callicebus melanochir	Baseline (Phylacine)	8.79944	0	31.9627	68
Primates	Callicebus melanochir	Baseline (IUCN)	7.0281	0	25.5219	50
Primates	Callicebus melanochir	Habitat loss (HL)	2.42937	0	8.82274	50
Primates	Callicebus melanochir	Overhunting (OH)	11.4612	0	42.4034	50
Primates	Callicebus melanochir	Habitat loss + Overhunting (COMB)	2.31153	0	8.55164	50
Primates	Callicebus modestus	Baseline (Phylacine)	1.43308	0.303248	2.56291	16
Primates	Callicebus modestus	Baseline (IUCN)	0.989808	0.210113	1.7695	9
Primates	Callicebus modestus	Habitat loss (HL)	0.243791	0.0519279	0.435653	9
Primates	Callicebus modestus	Overhunting (OH)	1.22425	0.00637374	2.44494	9
Primates	Callicebus modestus	Habitat loss + Overhunting (COMB)	0.219159	0.00134236	0.437166	9
Primates	Callicebus moloch	Baseline (Phylacine)	20.4359	0	46.7336	485
Primates	Callicebus moloch	Baseline (IUCN)	18.461	0	42.2135	436
Primates	Callicebus moloch	Habitat loss (HL)	13.8537	0	31.6683	436
Primates	Callicebus moloch	Overhunting (OH)	23.6353	0	55.4596	436
Primates	Callicebus moloch	Habitat loss + Overhunting (COMB)	17.3401	0	40.6745	436
Primates	Callicebus nigrifrons	Baseline (Phylacine)	46.3982	0	168.381	268
Primates	Callicebus nigrifrons	Baseline (IUCN)	38.3539	0	139.183	226
Primates	Callicebus nigrifrons	Habitat loss (HL)	10.4624	0	37.9519	226
Primates	Callicebus nigrifrons	Overhunting (OH)	56.8954	0	210.626	226
Primates	Callicebus nigrifrons	Habitat loss + Overhunting (COMB)	8.96	0	33.155	226
Primates	Callicebus oenanthe	Baseline (Phylacine)	2.00612	0.429543	3.5827	19
Primates	Callicebus oenanthe	Baseline (IUCN)	2.19181	0.469737	3.91388	15
Primates	Callicebus oenanthe	Habitat loss (HL)	1.45576	0.311749	2.59977	15
Primates	Callicebus oenanthe	Overhunting (OH)	1.523	0.00122771	3.17155	15
Primates	Callicebus oenanthe	Habitat loss + Overhunting (COMB)	0.828017	0.00122771	1.70818	15
Primates	Callicebus olallae	Baseline (Phylacine)	0.81206	0.0820429	1.54208	8
Primates	Callicebus olallae	Baseline (IUCN)	0.188326	0.0191606	0.357492	2
Primates	Callicebus olallae	Habitat loss (HL)	0.00791904	0.000806089	0.015032	2
Primates	Callicebus olallae	Overhunting (OH)	0.173455	0	0.362876	2
Primates	Callicebus olallae	Habitat loss + Overhunting (COMB)	0.00613061	0	0.0128867	2
Primates	Callicebus ornatus	Baseline (Phylacine)	5.47287	1.02414	9.92161	36
Primates	Callicebus ornatus	Baseline (IUCN)	3.25955	0.612854	5.90626	21
Primates	Callicebus ornatus	Habitat loss (HL)	1.23838	0.234371	2.24239	21
Primates	Callicebus ornatus	Overhunting (OH)	5.47722	0.393651	10.5608	21
Primates	Callicebus ornatus	Habitat loss + Overhunting (COMB)	2.09924	0.15875	4.03972	21
Primates	Callicebus pallescens	Baseline (Phylacine)	44.9635	9.02238	80.9046	242
Primates	Callicebus pallescens	Baseline (IUCN)	30.3338	6.0849	54.5828	166
Primates	Callicebus pallescens	Habitat loss (HL)	28.9872	5.81986	52.1545	166
Primates	Callicebus pallescens	Overhunting (OH)	38.0904	0.0361539	76.8369	166
Primates	Callicebus pallescens	Habitat loss + Overhunting (COMB)	35.8737	0.0343382	72.3658	166
Primates	Callicebus personatus	Baseline (Phylacine)	6.18469	0	17.4362	77
Primates	Callicebus personatus	Baseline (IUCN)	5.41522	0	15.2666	66
Primates	Callicebus personatus	Habitat loss (HL)	2.0808	0	5.86644	66
Primates	Callicebus personatus	Overhunting (OH)	5.95111	0	17.2821	66
Primates	Callicebus personatus	Habitat loss + Overhunting (COMB)	1.79184	0	5.20467	66
Primates	Callicebus regulus	Baseline (Phylacine)	9.6307	0	27.3145	155
Primates	Callicebus regulus	Baseline (IUCN)	7.20939	0	20.4468	116
Primates	Callicebus regulus	Habitat loss (HL)	7.28469	0	20.6604	116
Primates	Callicebus regulus	Overhunting (OH)	9.15434	0	26.791	116
Primates	Callicebus regulus	Habitat loss + Overhunting (COMB)	9.03021	0	26.4275	116
Primates	Callicebus torquatus	Baseline (Phylacine)	5.56053	0	13.9391	161
Primates	Callicebus torquatus	Baseline (IUCN)	3.22757	0	8.09681	102
Primates	Callicebus torquatus	Habitat loss (HL)	3.18056	0	7.97879	102
Primates	Callicebus torquatus	Overhunting (OH)	7.13401	0	18.3043	102
Primates	Callicebus torquatus	Habitat loss + Overhunting (COMB)	4.72533	0	12.1212	102
Primates	Callimico goeldii	Baseline (Phylacine)	3.63493	0	10.9891	422
Primates	Callimico goeldii	Baseline (IUCN)	2.94829	0	8.91343	332
Primates	Callimico goeldii	Habitat loss (HL)	2.90417	0	8.78016	332
Primates	Callimico goeldii	Overhunting (OH)	3.30865	0	10.2452	332
Primates	Callimico goeldii	Habitat loss + Overhunting (COMB)	2.86574	0	8.87202	332
Rodentia	Callistomys pictus	Baseline (Phylacine)	1.30046	0.445031	2.15589	17
Rodentia	Callistomys pictus	Baseline (IUCN)	1.21278	0.415171	2.01038	16
Rodentia	Callistomys pictus	Habitat loss (HL)	1.04358	0.357304	1.72985	16
Rodentia	Callistomys pictus	Overhunting (OH)	1.8718	0.200375	3.54323	16
Rodentia	Callistomys pictus	Habitat loss + Overhunting (COMB)	1.30989	0.139832	2.47994	16
Primates	Callithrix aurita	Baseline (Phylacine)	2.89303	0	8.74006	87
Primates	Callithrix aurita	Baseline (IUCN)	2.26416	0	6.84021	69
Primates	Callithrix aurita	Habitat loss (HL)	0.733129	0	2.21508	69
Primates	Callithrix aurita	Overhunting (OH)	2.71447	0	8.46474	69
Primates	Callithrix aurita	Habitat loss + Overhunting (COMB)	0.760316	0	2.37057	69
Primates	Callithrix flaviceps	Baseline (Phylacine)	0.415245	0	1.25422	26
Primates	Callithrix flaviceps	Baseline (IUCN)	0.323325	0	0.976567	20
Primates	Callithrix flaviceps	Habitat loss (HL)	0.11713	0	0.35377	20
Primates	Callithrix flaviceps	Overhunting (OH)	0.552844	0	1.7217	20
Primates	Callithrix flaviceps	Habitat loss + Overhunting (COMB)	0.127642	0	0.397535	20
Primates	Callithrix geoffroyi	Baseline (Phylacine)	0.841788	0	2.5429	69
Primates	Callithrix geoffroyi	Baseline (IUCN)	0.719028	0	2.17194	63
Primates	Callithrix geoffroyi	Habitat loss (HL)	0.719946	0	2.17475	63
Primates	Callithrix geoffroyi	Overhunting (OH)	1.96542	0	6.07928	63
Primates	Callithrix geoffroyi	Habitat loss + Overhunting (COMB)	0.749026	0	2.31653	63
Primates	Callithrix jacchus	Baseline (Phylacine)	47.4913	0	109.491	298
Primates	Callithrix jacchus	Baseline (IUCN)	42.8632	0	98.8181	269
Primates	Callithrix jacchus	Habitat loss (HL)	39.386	0	90.8029	269
Primates	Callithrix jacchus	Overhunting (OH)	60.3677	0	146.994	269
Primates	Callithrix jacchus	Habitat loss + Overhunting (COMB)	54.7774	0	133.371	269
Primates	Callithrix kuhlii	Baseline (Phylacine)	1.1975	0	4.26357	28
Primates	Callithrix kuhlii	Baseline (IUCN)	0.851118	0	3.03014	27
Primates	Callithrix kuhlii	Habitat loss (HL)	0.807216	0	2.87384	27
Primates	Callithrix kuhlii	Overhunting (OH)	2.15792	0	7.8361	27
Primates	Callithrix kuhlii	Habitat loss + Overhunting (COMB)	0.930137	0	3.37793	27
Primates	Callithrix penicillata	Baseline (Phylacine)	16.3885	0	44.7435	691
Primates	Callithrix penicillata	Baseline (IUCN)	14.3357	0	39.136	602
Primates	Callithrix penicillata	Habitat loss (HL)	11.8443	0	32.333	602
Primates	Callithrix penicillata	Overhunting (OH)	18.6805	0	52.9281	602
Primates	Callithrix penicillata	Habitat loss + Overhunting (COMB)	15.3327	0	43.4311	602
Rodentia	Callosciurus adamsi	Baseline (Phylacine)	1.64748	0.580344	2.71462	79
Rodentia	Callosciurus adamsi	Baseline (IUCN)	1.2142	0.428193	2.0002	60
Rodentia	Callosciurus adamsi	Habitat loss (HL)	0.966595	0.341132	1.59206	60
Rodentia	Callosciurus adamsi	Overhunting (OH)	2.19773	0.124587	4.27087	60
Rodentia	Callosciurus adamsi	Habitat loss + Overhunting (COMB)	1.28272	0.0741081	2.49133	60
Rodentia	Callosciurus albescens	Baseline (Phylacine)	0.648682	0.234937	1.06243	27
Rodentia	Callosciurus albescens	Baseline (IUCN)	0.604483	0.218849	0.990118	25
Rodentia	Callosciurus albescens	Habitat loss (HL)	0.631726	0.228365	1.03509	25
Rodentia	Callosciurus albescens	Overhunting (OH)	1.002	0.0870015	1.91699	25
Rodentia	Callosciurus albescens	Habitat loss + Overhunting (COMB)	0.895698	0.078842	1.71255	25
Rodentia	Callosciurus baluensis	Baseline (Phylacine)	0.968869	0.336342	1.6014	54
Rodentia	Callosciurus baluensis	Baseline (IUCN)	0.735347	0.255442	1.21525	40
Rodentia	Callosciurus baluensis	Habitat loss (HL)	0.807122	0.281333	1.33291	40
Rodentia	Callosciurus baluensis	Overhunting (OH)	1.40213	0.0840161	2.72024	40
Rodentia	Callosciurus baluensis	Habitat loss + Overhunting (COMB)	1.05639	0.063991	2.04878	40
Rodentia	Callosciurus caniceps	Baseline (Phylacine)	5.84527	2.02113	9.6694	239
Rodentia	Callosciurus caniceps	Baseline (IUCN)	5.36623	1.85966	8.8728	217
Rodentia	Callosciurus caniceps	Habitat loss (HL)	5.46284	1.89711	9.02858	217
Rodentia	Callosciurus caniceps	Overhunting (OH)	6.17396	0.336994	12.0211	217
Rodentia	Callosciurus caniceps	Habitat loss + Overhunting (COMB)	5.84601	0.317753	11.3842	217
Rodentia	Callosciurus erythraeus	Baseline (Phylacine)	87.018	0	308.499	1461
Rodentia	Callosciurus erythraeus	Baseline (IUCN)	85.7482	0	304	1422
Rodentia	Callosciurus erythraeus	Habitat loss (HL)	50.2359	0	178.234	1422
Rodentia	Callosciurus erythraeus	Overhunting (OH)	145.387	0	528.725	1422
Rodentia	Callosciurus erythraeus	Habitat loss + Overhunting (COMB)	61.125	0	222.383	1422
Rodentia	Callosciurus finlaysonii	Baseline (Phylacine)	6.49025	2.20931	10.7712	255
Rodentia	Callosciurus finlaysonii	Baseline (IUCN)	5.59579	1.90752	9.28406	217
Rodentia	Callosciurus finlaysonii	Habitat loss (HL)	5.47281	1.86663	9.07898	217
Rodentia	Callosciurus finlaysonii	Overhunting (OH)	6.85835	0.398748	13.3285	217
Rodentia	Callosciurus finlaysonii	Habitat loss + Overhunting (COMB)	6.39288	0.371003	12.4251	217
Rodentia	Callosciurus inornatus	Baseline (Phylacine)	3.42514	1.13792	5.71236	162
Rodentia	Callosciurus inornatus	Baseline (IUCN)	3.09002	1.02619	5.15385	146
Rodentia	Callosciurus inornatus	Habitat loss (HL)	2.88966	0.960028	4.81929	146
Rodentia	Callosciurus inornatus	Overhunting (OH)	4.13675	0.173179	8.10033	146
Rodentia	Callosciurus inornatus	Habitat loss + Overhunting (COMB)	3.53899	0.148405	6.92958	146
Rodentia	Callosciurus melanogaster	Baseline (Phylacine)	0.0286963	0.0105664	0.0468262	3
Rodentia	Callosciurus melanogaster	Baseline (IUCN)	0.0286963	0.0105664	0.0468262	3
Rodentia	Callosciurus melanogaster	Habitat loss (HL)	0.0880703	0.0324428	0.143698	3
Rodentia	Callosciurus melanogaster	Overhunting (OH)	0.119096	0.0111384	0.227054	3
Rodentia	Callosciurus melanogaster	Habitat loss + Overhunting (COMB)	0.119096	0.0111384	0.227054	3
Rodentia	Callosciurus nigrovittatus	Baseline (Phylacine)	6.31119	2.29618	10.3262	268
Rodentia	Callosciurus nigrovittatus	Baseline (IUCN)	6.28587	2.28691	10.2848	267
Rodentia	Callosciurus nigrovittatus	Habitat loss (HL)	3.53539	1.28143	5.78935	267
Rodentia	Callosciurus nigrovittatus	Overhunting (OH)	9.57249	0.651927	18.4942	267
Rodentia	Callosciurus nigrovittatus	Habitat loss + Overhunting (COMB)	4.90873	0.360033	9.45747	267
Rodentia	Callosciurus notatus	Baseline (Phylacine)	14.7413	5.27573	24.207	576
Rodentia	Callosciurus notatus	Baseline (IUCN)	14.7479	5.27808	24.2177	577
Rodentia	Callosciurus notatus	Habitat loss (HL)	15.7101	5.62465	25.7955	577
Rodentia	Callosciurus notatus	Overhunting (OH)	21.2288	1.54094	40.92	577
Rodentia	Callosciurus notatus	Habitat loss + Overhunting (COMB)	20.4076	1.47892	39.3397	577
Rodentia	Callosciurus orestes	Baseline (Phylacine)	1.10376	0.384614	1.8229	48
Rodentia	Callosciurus orestes	Baseline (IUCN)	0.869059	0.302722	1.4354	37
Rodentia	Callosciurus orestes	Habitat loss (HL)	0.813017	0.283387	1.34265	37
Rodentia	Callosciurus orestes	Overhunting (OH)	1.24517	0.0704502	2.41988	37
Rodentia	Callosciurus orestes	Habitat loss + Overhunting (COMB)	1.10142	0.0625829	2.14026	37
Rodentia	Callosciurus phayrei	Baseline (Phylacine)	2.28921	0.773892	3.80453	93
Rodentia	Callosciurus phayrei	Baseline (IUCN)	1.92169	0.650079	3.1933	78
Rodentia	Callosciurus phayrei	Habitat loss (HL)	1.43113	0.484133	2.37813	78
Rodentia	Callosciurus phayrei	Overhunting (OH)	2.46912	0.113473	4.82476	78
Rodentia	Callosciurus phayrei	Habitat loss + Overhunting (COMB)	1.77626	0.083242	3.46929	78
Rodentia	Callosciurus prevostii	Baseline (Phylacine)	18.7909	0	66.0533	533
Rodentia	Callosciurus prevostii	Baseline (IUCN)	18.7018	0	65.7399	531
Rodentia	Callosciurus prevostii	Habitat loss (HL)	13.4057	0	47.1271	531
Rodentia	Callosciurus prevostii	Overhunting (OH)	26.9027	0	96.9089	531
Rodentia	Callosciurus prevostii	Habitat loss + Overhunting (COMB)	17.7266	0	63.8478	531
Rodentia	Callosciurus pygerythrus	Baseline (Phylacine)	4.63131	1.55313	7.7095	254
Rodentia	Callosciurus pygerythrus	Baseline (IUCN)	4.20336	1.40928	6.99743	227
Rodentia	Callosciurus pygerythrus	Habitat loss (HL)	3.91552	1.31218	6.51887	227
Rodentia	Callosciurus pygerythrus	Overhunting (OH)	7.0803	0.35583	13.8048	227
Rodentia	Callosciurus pygerythrus	Habitat loss + Overhunting (COMB)	5.03255	0.253437	9.81167	227
Rodentia	Callosciurus quinquestriatus	Baseline (Phylacine)	0.315209	0.104123	0.526296	34
Rodentia	Callosciurus quinquestriatus	Baseline (IUCN)	0.254085	0.0843597	0.42381	34
Rodentia	Callosciurus quinquestriatus	Habitat loss (HL)	0.0978539	0.0322935	0.163414	34
Rodentia	Callosciurus quinquestriatus	Overhunting (OH)	0.97955	0.0422712	1.91683	34
Rodentia	Callosciurus quinquestriatus	Habitat loss + Overhunting (COMB)	0.118614	0.00483581	0.232393	34
Rodentia	Callospermophilus madrensis	Baseline (Phylacine)	0.00075308	0.000238542	0.00126762	36
Rodentia	Callospermophilus madrensis	Baseline (IUCN)	0.00075308	0.000238542	0.00126762	29
Rodentia	Callospermophilus madrensis	Habitat loss (HL)	0	0	0	29
Rodentia	Callospermophilus madrensis	Overhunting (OH)	1.28025	0.094341	2.46616	29
Rodentia	Callospermophilus madrensis	Habitat loss + Overhunting (COMB)	0	0	0	29
Rodentia	Calomys boliviae	Baseline (Phylacine)	19.649	0	70.7643	91
Rodentia	Calomys boliviae	Baseline (IUCN)	18.4416	0	66.4234	70
Rodentia	Calomys boliviae	Habitat loss (HL)	21.1188	0	76.0653	70
Rodentia	Calomys boliviae	Overhunting (OH)	44.4849	0	163.604	70
Rodentia	Calomys boliviae	Habitat loss + Overhunting (COMB)	29.4648	0	108.356	70
Rodentia	Calomys callidus	Baseline (Phylacine)	1.07318	0	3.86237	24
Rodentia	Calomys callidus	Baseline (IUCN)	1.07302	0	3.86178	21
Rodentia	Calomys callidus	Habitat loss (HL)	1.24322	0	4.4783	21
Rodentia	Calomys callidus	Overhunting (OH)	20.5685	0	75.7116	21
Rodentia	Calomys callidus	Habitat loss + Overhunting (COMB)	2.1322	0	7.85287	21
Rodentia	Calomys callosus	Baseline (Phylacine)	6.76042	0	24.3326	1367
Rodentia	Calomys callosus	Baseline (IUCN)	6.39558	0	23.0185	1266
Rodentia	Calomys callosus	Habitat loss (HL)	93.8372	0	337.635	1266
Rodentia	Calomys callosus	Overhunting (OH)	1052.42	0	3867.99	1266
Rodentia	Calomys callosus	Habitat loss + Overhunting (COMB)	158.467	0	582.518	1266
Rodentia	Calomys expulsus	Baseline (Phylacine)	222.194	0	800.409	510
Rodentia	Calomys expulsus	Baseline (IUCN)	203.354	0	732.561	445
Rodentia	Calomys expulsus	Habitat loss (HL)	198.049	0	713.402	445
Rodentia	Calomys expulsus	Overhunting (OH)	399.912	0	1470.34	445
Rodentia	Calomys expulsus	Habitat loss + Overhunting (COMB)	350.879	0	1290.14	445
Rodentia	Calomys fecundus	Baseline (Phylacine)	7.76149	0	28.0064	38
Rodentia	Calomys fecundus	Baseline (IUCN)	7.25014	0	26.162	26
Rodentia	Calomys fecundus	Habitat loss (HL)	7.97977	0	28.7949	26
Rodentia	Calomys fecundus	Overhunting (OH)	15.3584	0	56.5564	26
Rodentia	Calomys fecundus	Habitat loss + Overhunting (COMB)	11.7038	0	43.0973	26
Rodentia	Calomys hummelincki	Baseline (Phylacine)	19.1247	0	69.1362	202
Rodentia	Calomys hummelincki	Baseline (IUCN)	18.7417	0	67.7526	154
Rodentia	Calomys hummelincki	Habitat loss (HL)	47.3001	0	170.95	154
Rodentia	Calomys hummelincki	Overhunting (OH)	113.806	0	420.291	154
Rodentia	Calomys hummelincki	Habitat loss + Overhunting (COMB)	84.6422	0	312.614	154
Rodentia	Calomys laucha	Baseline (Phylacine)	7.14306	0	26.0881	337
Rodentia	Calomys laucha	Baseline (IUCN)	4.18186	0	15.2847	272
Rodentia	Calomys laucha	Habitat loss (HL)	20.6628	0	75.3982	272
Rodentia	Calomys laucha	Overhunting (OH)	195.937	0	730.916	272
Rodentia	Calomys laucha	Habitat loss + Overhunting (COMB)	38.105	0	142.213	272
Rodentia	Calomys lepidus	Baseline (Phylacine)	0.050995	0	0.186603	66
Rodentia	Calomys lepidus	Baseline (IUCN)	0.0505808	0	0.185089	33
Rodentia	Calomys lepidus	Habitat loss (HL)	0.932866	0	3.41521	33
Rodentia	Calomys lepidus	Overhunting (OH)	21.2183	0	79.1393	33
Rodentia	Calomys lepidus	Habitat loss + Overhunting (COMB)	1.60552	0	5.99369	33
Rodentia	Calomys musculinus	Baseline (Phylacine)	8.17949	0	29.8555	227
Rodentia	Calomys musculinus	Baseline (IUCN)	7.46269	0	27.2383	202
Rodentia	Calomys musculinus	Habitat loss (HL)	8.23256	0	30.038	202
Rodentia	Calomys musculinus	Overhunting (OH)	138.077	0	514.699	202
Rodentia	Calomys musculinus	Habitat loss + Overhunting (COMB)	16.2924	0	60.769	202
Rodentia	Calomys sorellus	Baseline (Phylacine)	6.70742	0	24.5224	43
Rodentia	Calomys sorellus	Baseline (IUCN)	5.24474	0	19.1788	26
Rodentia	Calomys sorellus	Habitat loss (HL)	8.4604	0	30.9414	26
Rodentia	Calomys sorellus	Overhunting (OH)	16.8386	0	62.7757	26
Rodentia	Calomys sorellus	Habitat loss + Overhunting (COMB)	12.383	0	46.1825	26
Rodentia	Calomys tener	Baseline (Phylacine)	1.28295	0	4.7752	836
Rodentia	Calomys tener	Baseline (IUCN)	1.27315	0	4.73876	760
Rodentia	Calomys tener	Habitat loss (HL)	58.6409	0	218.174	760
Rodentia	Calomys tener	Overhunting (OH)	482.032	0	1833.45	760
Rodentia	Calomys tener	Habitat loss + Overhunting (COMB)	116.743	0	444.399	760
Rodentia	Calomys tocantinsi	Baseline (Phylacine)	15.977	0	57.8876	91
Rodentia	Calomys tocantinsi	Baseline (IUCN)	11.0072	0	39.882	69
Rodentia	Calomys tocantinsi	Habitat loss (HL)	7.34635	0	26.6186	69
Rodentia	Calomys tocantinsi	Overhunting (OH)	54.0619	0	199.824	69
Rodentia	Calomys tocantinsi	Habitat loss + Overhunting (COMB)	15.2466	0	56.3531	69
Didelphimorphia	Caluromys derbianus	Baseline (Phylacine)	8.36253	2.98353	13.7415	383
Didelphimorphia	Caluromys derbianus	Baseline (IUCN)	7.91299	2.8255	13.0005	356
Didelphimorphia	Caluromys derbianus	Habitat loss (HL)	4.37215	1.56345	7.18085	356
Didelphimorphia	Caluromys derbianus	Overhunting (OH)	11.8175	1.07701	22.5579	356
Didelphimorphia	Caluromys derbianus	Habitat loss + Overhunting (COMB)	5.28253	0.496248	10.0688	356
Didelphimorphia	Caluromys lanatus	Baseline (Phylacine)	57.587	20.3013	94.8728	2383
Didelphimorphia	Caluromys lanatus	Baseline (IUCN)	54.6275	19.2342	90.0208	2255
Didelphimorphia	Caluromys lanatus	Habitat loss (HL)	35.6805	12.6013	58.7596	2255
Didelphimorphia	Caluromys lanatus	Overhunting (OH)	76.1827	11.5926	140.773	2255
Didelphimorphia	Caluromys lanatus	Habitat loss + Overhunting (COMB)	43.3926	6.75976	80.0254	2255
Didelphimorphia	Caluromys philander	Baseline (Phylacine)	30.964	0	109.317	1724
Didelphimorphia	Caluromys philander	Baseline (IUCN)	28.6641	0	101.193	1589
Didelphimorphia	Caluromys philander	Habitat loss (HL)	19.8243	0	69.9835	1589
Didelphimorphia	Caluromys philander	Overhunting (OH)	51.2541	0	184.848	1589
Didelphimorphia	Caluromys philander	Habitat loss + Overhunting (COMB)	28.5987	0	103.16	1589
Didelphimorphia	Caluromysiops irrupta	Baseline (Phylacine)	2.22532	0.892074	3.55856	133
Didelphimorphia	Caluromysiops irrupta	Baseline (IUCN)	1.79599	0.720443	2.87155	104
Didelphimorphia	Caluromysiops irrupta	Habitat loss (HL)	1.52301	0.608975	2.43704	104
Didelphimorphia	Caluromysiops irrupta	Overhunting (OH)	2.51232	0.405117	4.61951	104
Didelphimorphia	Caluromysiops irrupta	Habitat loss + Overhunting (COMB)	1.76109	0.283113	3.23907	104
Cingulata	Calyptophractus retusus	Baseline (Phylacine)	0.815576	0.229927	1.40122	164
Cingulata	Calyptophractus retusus	Baseline (IUCN)	0.816766	0.230278	1.40325	138
Cingulata	Calyptophractus retusus	Habitat loss (HL)	0.523415	0.147838	0.898992	138
Cingulata	Calyptophractus retusus	Overhunting (OH)	2.25006	0.045921	4.45477	138
Cingulata	Calyptophractus retusus	Habitat loss + Overhunting (COMB)	0.878019	0.020391	1.73588	138
Carnivora	Canis adustus	Baseline (Phylacine)	5.18894	0	15.6475	2547
Carnivora	Canis adustus	Baseline (IUCN)	4.9501	0	14.9265	2423
Carnivora	Canis adustus	Habitat loss (HL)	4.44284	0	13.3978	2423
Carnivora	Canis adustus	Overhunting (OH)	4.61483	0	14.4806	2423
[truncated: 17,286 more rows]
